# Supplementary material
Source: publisher figshare collection journal article supplement (https://acs.figshare.com/ndownloader/files/25632772)

## **Supporting Information**

# **Regioselective C–H Alkenylation and Unsymmetrical Bis-Olefination of Heteroarene Carboxylic Acids with Ruthenium Catalysis in Water**

Anup Mandal, Ratnadeep Bera, and Mahiuddin Baidya\*

Department of Chemistry, Indian Institute of Technology Madras,

Chennai–600036, Tamil Nadu, India

E-mail: mbaidya@iitm.ac.in

## Table of Contents

|                                                      | Page |
|------------------------------------------------------|------|
| <b>Mechanistic Studies:</b>                          |      |
| H-D Exchange Study                                   | S03  |
| Radical Scavenger Experiment                         | S04  |
| Kinetic Isotope Effect Study via Parallel Experiment | S04  |
| Crystallographic Experimental Section                | S05  |
| NMR Spectra of Synthesized Compounds                 | S15  |

## Mechanistic Studies:

### 1) H-D Exchange Study

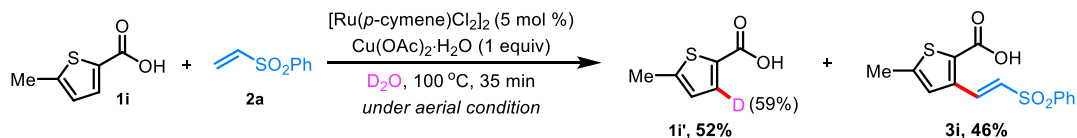

5-Methyl-2-thiophenecarboxylic acid **1i** (0.2 mmol), phenyl vinyl sulfone **2a** (1.1 equiv),  $[\text{Ru}(p\text{-cymene})\text{Cl}_2]_2$  (5 mol %), and  $\text{Cu}(\text{OAc})_2 \cdot \text{H}_2\text{O}$  (1 equiv) were added in an oven-dried screw cap reaction tube with a magnetic stir bar under open-air. Then,  $\text{D}_2\text{O}$  (1 mL) was added with a syringe. The reaction tube was capped and the resulting mixture was heated at 100 °C (in oil-bath) for 35 minutes. After that, it was allowed to cool at room temperature and then quenched with AcOH and diluted with  $\text{NH}_4\text{Cl}$  solution. The mixture was extracted with ethyl acetate (10 mL, two times). The organic layer was dried over anhydrous sodium sulfate and concentrated under reduced pressure. The resulting deuterium incorporated 5-methyl-2-thiophenecarboxylic acid and the olefinated product were purified by silica gel column chromatography. The H/D exchange result was determined by  $^1\text{H}$  NMR spectroscopy.

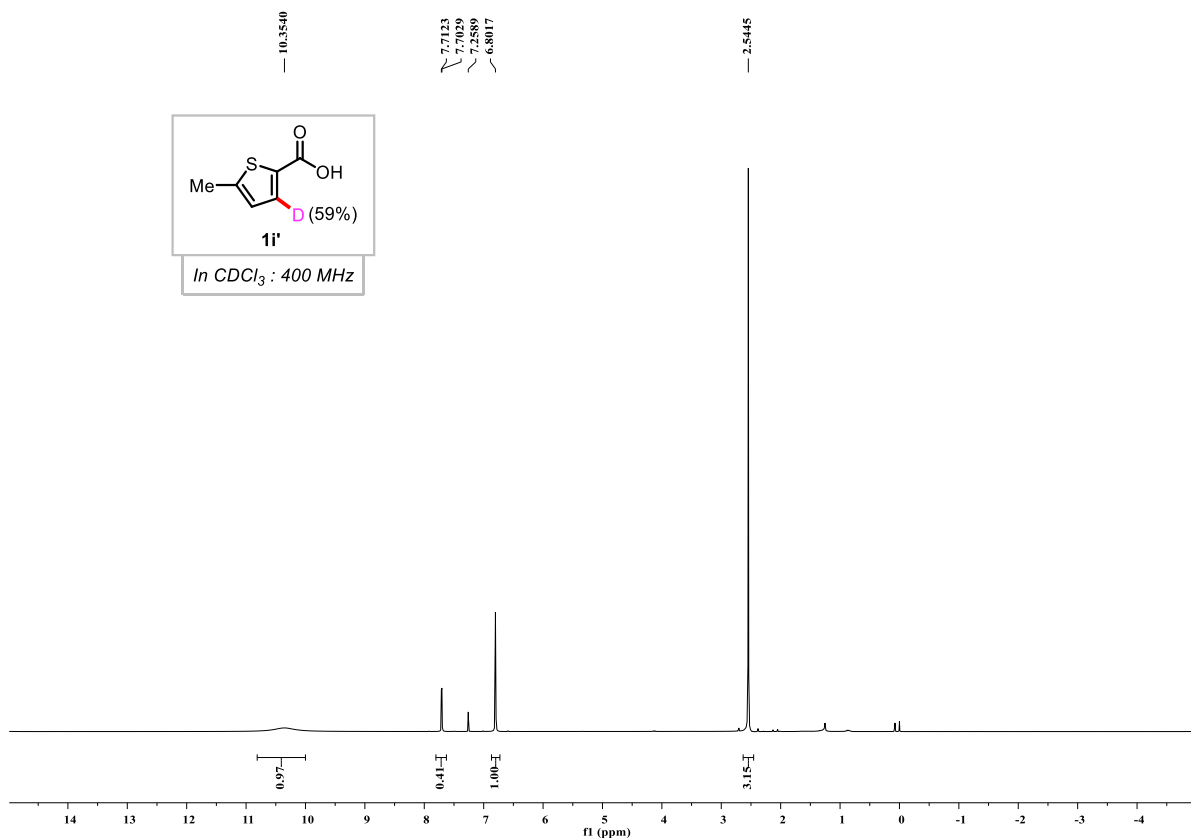

**Figure S1.**  $^1\text{H}$  NMR spectrum of deuterium-incorporated 5-methyl-2-thiophenecarboxylic acid **1i'**.

## 2) Radical Scavenger Experiment

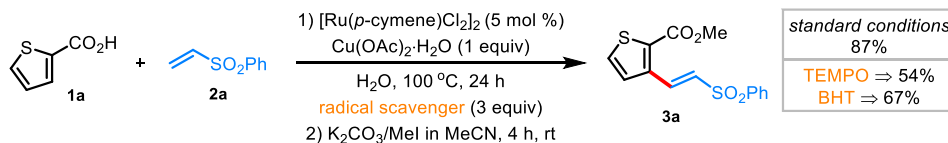

2-Thiophenecarboxylic acid **1a** (0.2 mmol) and phenyl vinyl sulfone **2a** (1.1 equiv), [Ru(*p*-cymene)Cl<sub>2</sub>]<sub>2</sub> (5 mol %), Cu(OAc)<sub>2</sub>·H<sub>2</sub>O (1 equiv), and corresponding radical scavenger (3 equiv) were added in an oven-dried screw cap reaction tube with a magnetic stir bar under open-air. Then, H<sub>2</sub>O (1 mL) was added with a syringe. The reaction tube was capped and the resulting mixture was heated at 100 °C (in oil-bath) for 24 h. After that, it was allowed to cool at room temperature and then quenched with AcOH and diluted with NH<sub>4</sub>Cl solution. The mixture was extracted with ethyl acetate (10 mL, two times). The organic layer was dried over anhydrous sodium sulfate and concentrated under reduced pressure. The crude product was treated with K<sub>2</sub>CO<sub>3</sub> (2 equiv), MeI (3 equiv) in MeCN (1 mL) at room temperature for 4 h and then concentrated under reduced pressure. The resulting residue was purified by silica gel column chromatography.

## 3) Kinetic Isotope Effect Study via Parallel Experiment

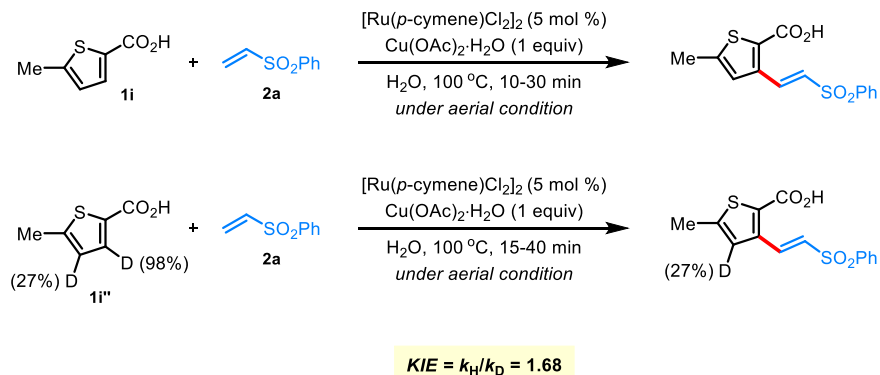

5-Methyl-2-thiophenecarboxylic acid **1i** and deuterated-5-methyl-2-thiophenecarboxylic acid **1i''** were independently reacted with **2a** for five different time intervals (10-40 minutes) under the standard reaction conditions [**1i** (0.2 mmol) or **1i''** (0.2 mmol), phenyl vinyl sulfone **2a** (1.1 equiv), [Ru(*p*-cymene)Cl<sub>2</sub>]<sub>2</sub> (5 mol %), and Cu(OAc)<sub>2</sub>·H<sub>2</sub>O (1 equiv), H<sub>2</sub>O (1 mL)]. The product distributions were analyzed from the worked-up crude reaction mixture by <sup>1</sup>H NMR spectroscopy using dibromomethane as an internal standard.



| time (min)                | 10 min | 15 min | 20 min | 25 min | 30 min | 35 min | 40 min |
|---------------------------|--------|--------|--------|--------|--------|--------|--------|
| <b>1i</b> → Product (%)   | 27.1   | 33.2   | 36.3   | 41.2   | 43.2   | -      | -      |
| <b>1i''</b> → Product (%) | -      | 17.4   | 20.9   | -      | 24.2   | 26.7   | 30.3   |

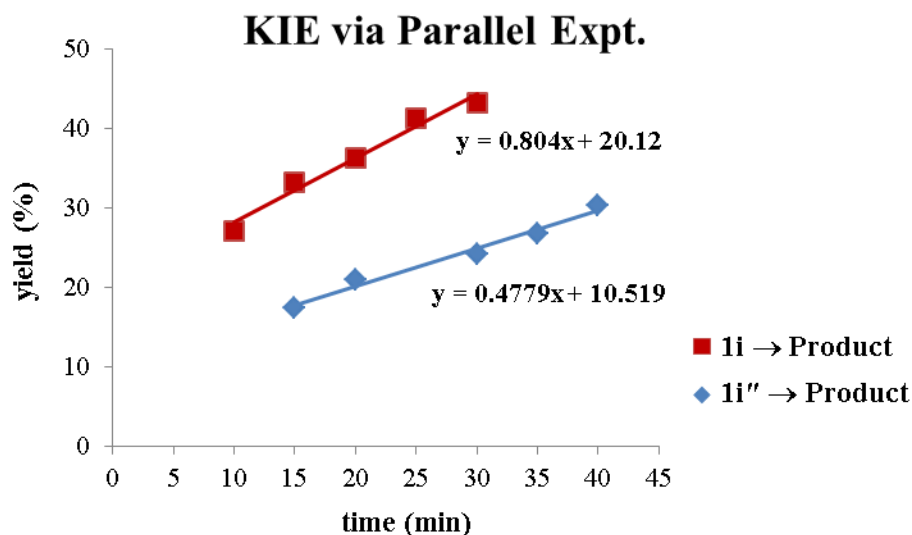

**Figure S2.** Time vs yield plot for KIE determination.

### Crystallographic Experimental Section:

**Single Crystal X-ray Crystallography:** X-ray data of the crystals were collected and integrated using a Bruker Axs (Kappa Apex 2) CCD diffractometer equipped with graphite monochromatic Mo ( $K\alpha$ ) radiation. Crystals were mounted over fine nylon loop which was attached to the copper mounting pin held on by a magnetic base. The APEX 3 and APEX 3-SAINT/Bruker SAINT programs were used for the data collection and unit-cell determination, respectively. The crystal structures were solved by direct methods using SHELXL-2014/4 or SHELXS-97 and refined by full-matrix least-squares on  $F^2$  method using program SHELXL-2014/7 or SHELXL-2018/3.

**Method of Crystallization:** All the single crystals were grown in a small glass vial by slow evaporation technique from DCM/Hexane solvent system at room temperature over a period of 1-2 weeks.

**Crystal Structure of Compound 3c:** ORTEP representation (40% ellipsoids probability) of **3c** (CCDC 1975675).

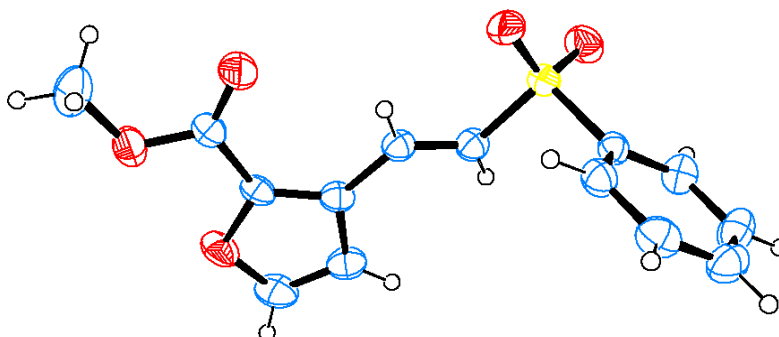

**Table S1.** Crystal data and structure refinement for **3c** (CCDC 1975675).

|                                   |                                                                                                     |
|-----------------------------------|-----------------------------------------------------------------------------------------------------|
| Identification code               | 532                                                                                                 |
| Empirical formula                 | C <sub>14</sub> H <sub>12</sub> O <sub>5</sub> S                                                    |
| Formula weight                    | 292.30                                                                                              |
| Temperature                       | 296(2) K                                                                                            |
| Wavelength                        | 0.71073 Å                                                                                           |
| Crystal system, space group       | Orthorhombic, Pbca                                                                                  |
| Unit cell dimensions              | a = 7.6046(2) Å $\alpha$ = 90°<br>b = 15.5125(5) Å $\beta$ = 90°<br>c = 23.2195(7) Å $\gamma$ = 90° |
| Volume                            | 2739.12(14) Å <sup>3</sup>                                                                          |
| Z, Calculated density             | 8, 1.418 Mg/m <sup>3</sup>                                                                          |
| Absorption coefficient            | 0.252 mm <sup>-1</sup>                                                                              |
| F(000)                            | 1216                                                                                                |
| Crystal size                      | 0.250 x 0.220 x 0.100 mm                                                                            |
| Theta range for data collection   | 2.769 to 24.999 deg.                                                                                |
| Limiting indices                  | -7 ≤ h ≤ 9, -18 ≤ k ≤ 15, -27 ≤ l ≤ 27                                                              |
| Reflections collected / unique    | 15544 / 2406 [R(int) = 0.0244]                                                                      |
| Completeness to theta = 25.000    | 99.9 %                                                                                              |
| Absorption correction             | None                                                                                                |
| Refinement method                 | Full-matrix least-squares on F <sup>2</sup>                                                         |
| Data / restraints / parameters    | 2406 / 0 / 182                                                                                      |
| Goodness-of-fit on F <sup>2</sup> | 1.054                                                                                               |

|                                      |                                    |
|--------------------------------------|------------------------------------|
| Final R indices [ $I > 2\sigma(I)$ ] | R1 = 0.0352, wR2 = 0.0837          |
| R indices (all data)                 | R1 = 0.0445, wR2 = 0.0916          |
| Extinction coefficient               | n/a                                |
| Largest diff. peak and hole          | 0.184 and -0.305 e.Å <sup>-3</sup> |

**Crystal Structure of Compound 3f:** ORTEP representation (40% ellipsoids probability) of **3f** (CCDC 1975672).

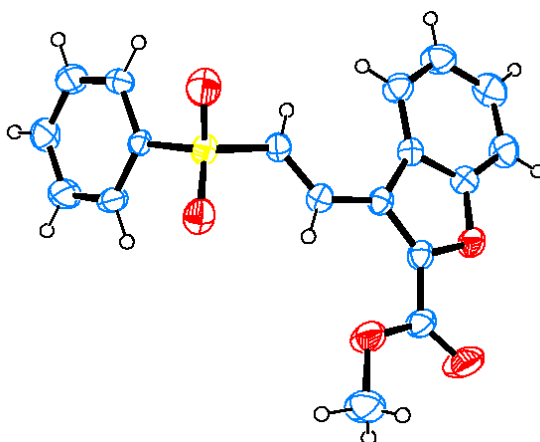

**Table S2.** Crystal data and structure refinement for **3f** (CCDC 1975672).

|                                 |                                                                                                      |
|---------------------------------|------------------------------------------------------------------------------------------------------|
| Identification code             | 787                                                                                                  |
| Empirical formula               | C <sub>18</sub> H <sub>14</sub> O <sub>5</sub> S                                                     |
| Formula weight                  | 342.35                                                                                               |
| Temperature                     | 296(2) K                                                                                             |
| Wavelength                      | 0.71073 Å                                                                                            |
| Crystal system, space group     | Orthorhombic, Pbca                                                                                   |
| Unit cell dimensions            | a = 17.7265(7) Å $\alpha$ = 90°<br>b = 11.8090(4) Å $\beta$ = 90°<br>c = 15.2926(4) Å $\gamma$ = 90° |
| Volume                          | 3201.23(19) Å <sup>3</sup>                                                                           |
| Z, Calculated density           | 8, 1.421 Mg/m <sup>3</sup>                                                                           |
| Absorption coefficient          | 0.227 mm <sup>-1</sup>                                                                               |
| F(000)                          | 1424                                                                                                 |
| Crystal size                    | 0.250 x 0.220 x 0.100 mm                                                                             |
| Theta range for data collection | 2.072 to 24.998 deg.                                                                                 |

|                                   |                                             |
|-----------------------------------|---------------------------------------------|
| Limiting indices                  | -13<=h<=21, -13<=k<=14, -18<=l<=12          |
| Reflections collected / unique    | 10818 / 2815 [R(int) = 0.0224]              |
| Completeness to theta = 25.000    | 99.9 %                                      |
| Absorption correction             | None                                        |
| Refinement method                 | Full-matrix least-squares on F <sup>2</sup> |
| Data / restraints / parameters    | 2815 / 0 / 218                              |
| Goodness-of-fit on F <sup>2</sup> | 1.053                                       |
| Final R indices [I>2sigma(I)]     | R1 = 0.0403, wR2 = 0.0959                   |
| R indices (all data)              | R1 = 0.0531, wR2 = 0.1040                   |
| Extinction coefficient            | n/a                                         |
| Largest diff. peak and hole       | 0.277 and -0.301 e.Å <sup>-3</sup>          |

**Crystal Structure of Compound 3h:** ORTEP representation (40% ellipsoids probability) of **3h** (CCDC 1975673).

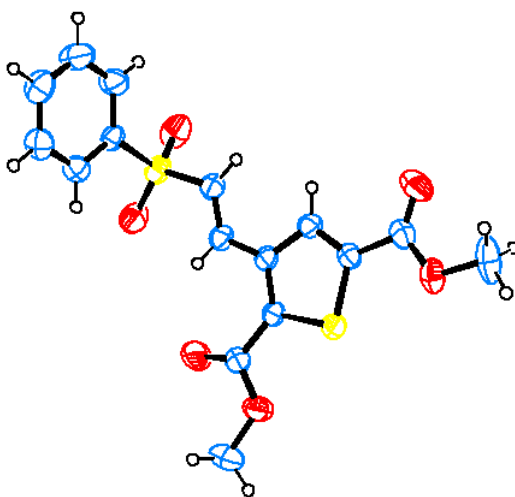

**Table S3.** Crystal data and structure refinement for **3h** (CCDC 1975673).

|                             |                         |
|-----------------------------|-------------------------|
| Identification code         | 28                      |
| Empirical formula           | C16 H14 O6 S2           |
| Formula weight              | 366.39                  |
| Temperature                 | 296(2) K                |
| Wavelength                  | 0.71073 Å               |
| Crystal system, space group | Orthorhombic, Pbca      |
| Unit cell dimensions        | a = 8.0160(2) Å α = 90° |

|                                      |                                                                                                     |
|--------------------------------------|-----------------------------------------------------------------------------------------------------|
|                                      | $b = 19.6309(8) \text{ \AA}$ $\beta = 90^\circ$<br>$c = 21.6558(8) \text{ \AA}$ $\gamma = 90^\circ$ |
| Volume                               | $3407.8(2) \text{ \AA}^3$                                                                           |
| Z, Calculated density                | 8, $1.428 \text{ Mg/m}^3$                                                                           |
| Absorption coefficient               | $0.341 \text{ mm}^{-1}$                                                                             |
| F(000)                               | 1520                                                                                                |
| Crystal size                         | $0.250 \times 0.220 \times 0.100 \text{ mm}$                                                        |
| Theta range for data collection      | $1.881$ to $24.996 \text{ deg.}$                                                                    |
| Limiting indices                     | $-9 \leq h \leq 9$ , $-21 \leq k \leq 23$ , $-25 \leq l \leq 19$                                    |
| Reflections collected / unique       | 7967 / 2995 [ $R(\text{int}) = 0.0402$ ]                                                            |
| Completeness to $\theta = 25.000$    | 99.9 %                                                                                              |
| Absorption correction                | None                                                                                                |
| Refinement method                    | Full-matrix least-squares on $F^2$                                                                  |
| Data / restraints / parameters       | 2995 / 0 / 219                                                                                      |
| Goodness-of-fit on $F^2$             | 1.009                                                                                               |
| Final R indices [ $I > 2\sigma(I)$ ] | $R1 = 0.0486$ , $wR2 = 0.0978$                                                                      |
| R indices (all data)                 | $R1 = 0.0957$ , $wR2 = 0.1207$                                                                      |
| Extinction coefficient               | n/a                                                                                                 |
| Largest diff. peak and hole          | $0.243$ and $-0.300 \text{ e.\AA}^{-3}$                                                             |

**Crystal Structure of Compound 4g:** ORTEP representation (40% ellipsoids probability) of **4g** (CCDC 1975676).

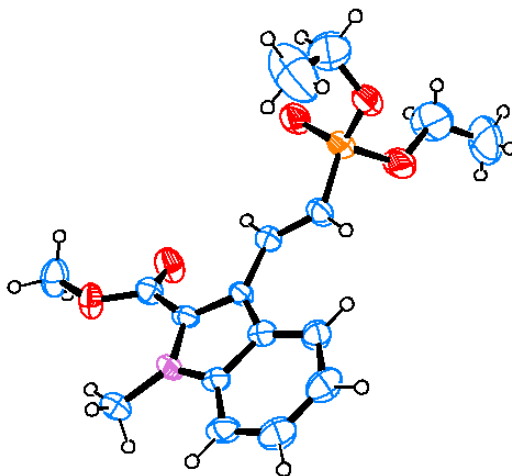

**Table S4.** Crystal data and structure refinement for **4g** (CCDC 1975676).

|                                   |                                                                                                                         |
|-----------------------------------|-------------------------------------------------------------------------------------------------------------------------|
| Identification code               | 891                                                                                                                     |
| Empirical formula                 | C <sub>17</sub> H <sub>22</sub> N O <sub>5</sub> P                                                                      |
| Formula weight                    | 351.32                                                                                                                  |
| Temperature                       | 296(2) K                                                                                                                |
| Wavelength                        | 0.71073 Å                                                                                                               |
| Crystal system, space group       | Triclinic, P-1                                                                                                          |
| Unit cell dimensions              | a = 7.4902(15) Å $\alpha$ = 88.249(6)°<br>b = 10.012(2) Å $\beta$ = 82.343(6)°<br>c = 25.476(5) Å $\gamma$ = 71.214(6)° |
| Volume                            | 1792.4(6) Å <sup>3</sup>                                                                                                |
| Z, Calculated density             | 4, 1.302 Mg/m <sup>3</sup>                                                                                              |
| Absorption coefficient            | 0.179 mm <sup>-1</sup>                                                                                                  |
| F(000)                            | 744                                                                                                                     |
| Crystal size                      | 0.200 x 0.150 x 0.150 mm <sup>3</sup>                                                                                   |
| Theta range for data collection   | 0.807 to 24.997 deg.                                                                                                    |
| Limiting indices                  | -8<=h<=8, -11<=k<=11, -30<=l<=30                                                                                        |
| Reflections collected / unique    | 32648 / 32648 [R(int) = ?]                                                                                              |
| Completeness to theta = 25.000    | 99.9 %                                                                                                                  |
| Absorption correction             | Semi-empirical from equivalents                                                                                         |
| Max. and min. transmission        | 0.7452 and 0.5243                                                                                                       |
| Refinement method                 | Full-matrix least-squares on F <sup>2</sup>                                                                             |
| Data / restraints / parameters    | 32648 / 39 / 454                                                                                                        |
| Goodness-of-fit on F <sup>2</sup> | 1.107                                                                                                                   |
| Final R indices [I>2sigma(I)]     | R1 = 0.1044, wR2 = 0.2823                                                                                               |
| R indices (all data)              | R1 = 0.1436, wR2 = 0.3062                                                                                               |
| Extinction coefficient            | 0.017(3)                                                                                                                |
| Largest diff. peak and hole       | 0.470 and -0.495 e.Å <sup>-3</sup>                                                                                      |

**Crystal Structure of Compound 5g:** ORTEP representation (40% ellipsoids probability) of **5g** (CCDC 1975674).

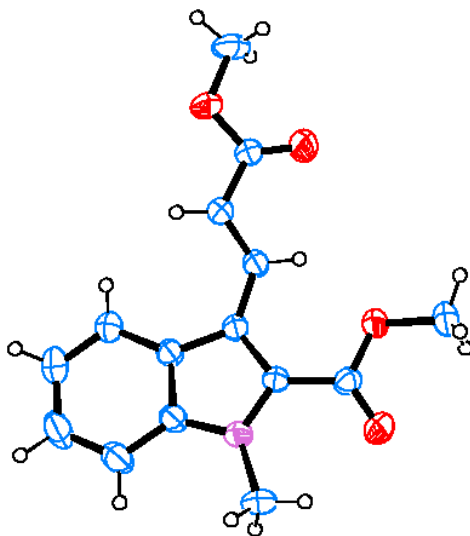

**Table S5.** Crystal data and structure refinement for **5g** (CCDC 1975674).

|                                 |                                                                                                                                   |
|---------------------------------|-----------------------------------------------------------------------------------------------------------------------------------|
| Identification code             | 21                                                                                                                                |
| Empirical formula               | C <sub>15</sub> H <sub>15</sub> N O <sub>4</sub>                                                                                  |
| Formula weight                  | 546.56                                                                                                                            |
| Temperature                     | 296(2) K                                                                                                                          |
| Wavelength                      | 0.71073 Å                                                                                                                         |
| Crystal system, space group     | Triclinic, P-1                                                                                                                    |
| Unit cell dimensions            | a = 10.9033(4) Å $\alpha$ = 100.1998(15)°<br>b = 11.1118(4) Å $\beta$ = 92.2428(17)°<br>c = 13.1220(4) Å $\gamma$ = 118.6290(14)° |
| Volume                          | 1359.16(8) Å <sup>3</sup>                                                                                                         |
| Z, Calculated density           | 2, 1.336 Mg/m <sup>3</sup>                                                                                                        |
| Absorption coefficient          | 0.098 mm <sup>-1</sup>                                                                                                            |
| F(000)                          | 576                                                                                                                               |
| Crystal size                    | 0.250 x 0.220 x 0.100 mm                                                                                                          |
| Theta range for data collection | 1.593 to 24.999 deg.                                                                                                              |
| Limiting indices                | -12 ≤ h ≤ 12, -13 ≤ k ≤ 12, -15 ≤ l ≤ 15                                                                                          |
| Reflections collected / unique  | 20423 / 4779 [R(int) = 0.0272]                                                                                                    |

|                                   |                                             |
|-----------------------------------|---------------------------------------------|
| Completeness to theta = 25.000    | 99.6 %                                      |
| Absorption correction             | None                                        |
| Refinement method                 | Full-matrix least-squares on F <sup>2</sup> |
| Data / restraints / parameters    | 4779 / 0 / 368                              |
| Goodness-of-fit on F <sup>2</sup> | 1.026                                       |
| Final R indices [I>2sigma(I)]     | R1 = 0.0453, wR2 = 0.1172                   |
| R indices (all data)              | R1 = 0.0625, wR2 = 0.1333                   |
| Extinction coefficient            | 0.014(2)                                    |
| Largest diff. peak and hole       | 0.305 and -0.264 e.Å <sup>-3</sup>          |

**Crystal Structure of Compound 6b:** ORTEP representation (40% ellipsoids probability) of **6b** (CCDC 2017084).

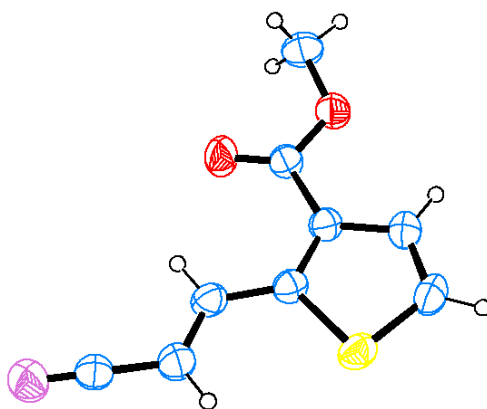

**Table S6.** Crystal data and structure refinement for **6b** (CCDC 2017084).

|                      |                                                  |          |
|----------------------|--------------------------------------------------|----------|
| Identification code  | 999                                              |          |
| Empirical formula    | C <sub>9</sub> H <sub>7</sub> N O <sub>2</sub> S |          |
| Formula weight       | 193.22                                           |          |
| Temperature          | 296(2) K                                         |          |
| Wavelength           | 0.71073 Å                                        |          |
| Crystal system       | Orthorhombic                                     |          |
| Space group          | F d d 2                                          |          |
| Unit cell dimensions | a = 21.3018(14) Å                                | α = 90°. |
|                      | b = 43.351(3) Å                                  | β = 90°. |
|                      | c = 3.9547(3) Å                                  | γ = 90°. |



|                                   |                                             |
|-----------------------------------|---------------------------------------------|
| Volume                            | 3652.0(4) Å <sup>3</sup>                    |
| Z                                 | 16                                          |
| Density (calculated)              | 1.406 Mg/m <sup>3</sup>                     |
| Absorption coefficient            | 0.317 mm <sup>-1</sup>                      |
| F(000)                            | 1600                                        |
| Crystal size                      | 0.300 x 0.250 x 0.200 mm <sup>3</sup>       |
| Theta range for data collection   | 3.407 to 28.310°.                           |
| Index ranges                      | -28<=h<=28, -56<=k<=56, -5<=l<=5            |
| Reflections collected             | 11871                                       |
| Independent reflections           | 2267 [R(int) = 0.0603]                      |
| Completeness to theta = 25.242°   | 99.4 %                                      |
| Absorption correction             | Semi-empirical from equivalents             |
| Max. and min. transmission        | 0.7457 and 0.5387                           |
| Refinement method                 | Full-matrix least-squares on F <sup>2</sup> |
| Data / restraints / parameters    | 2267 / 1 / 119                              |
| Goodness-of-fit on F <sup>2</sup> | 1.119                                       |
| Final R indices [I>2sigma(I)]     | R1 = 0.0433, wR2 = 0.0983                   |
| R indices (all data)              | R1 = 0.0560, wR2 = 0.1076                   |
| Absolute structure parameter      | 0.04(4)                                     |
| Extinction coefficient            | n/a                                         |
| Largest diff. peak and hole       | 0.219 and -0.277 e.Å <sup>-3</sup>          |

**Crystal Structure of Compound 8p:** ORTEP representation (40% ellipsoids probability) of **8p** (CCDC 2017085).

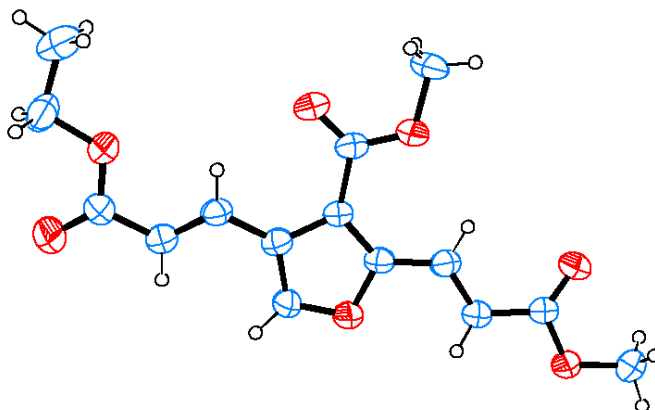

**Table S7.** Crystal data and structure refinement for **8p** (CCDC 2017085).

|                                   |                                                |                   |
|-----------------------------------|------------------------------------------------|-------------------|
| Identification code               | 1013                                           |                   |
| Empirical formula                 | C <sub>15</sub> H <sub>16</sub> O <sub>7</sub> |                   |
| Formula weight                    | 308.28                                         |                   |
| Temperature                       | 293(2) K                                       |                   |
| Wavelength                        | 0.71073 Å                                      |                   |
| Crystal system                    | Triclinic                                      |                   |
| Space group                       | P -1                                           |                   |
| Unit cell dimensions              | a = 4.03230(10) Å                              | α = 94.501(2)°.   |
|                                   | b = 12.1406(2) Å                               | β = 91.3350(10)°. |
|                                   | c = 15.7776(2) Å                               | γ = 93.6930(10)°. |
| Volume                            | 768.09(2) Å <sup>3</sup>                       |                   |
| Z                                 | 2                                              |                   |
| Density (calculated)              | 1.333 Mg/m <sup>3</sup>                        |                   |
| Absorption coefficient            | 0.107 mm <sup>-1</sup>                         |                   |
| F(000)                            | 324                                            |                   |
| Crystal size                      | 0.300 x 0.250 x 0.200 mm <sup>3</sup>          |                   |
| Theta range for data collection   | 2.976 to 24.997°.                              |                   |
| Index ranges                      | -4 ≤ h ≤ 4, -14 ≤ k ≤ 14, -18 ≤ l ≤ 18         |                   |
| Reflections collected             | 23407                                          |                   |
| Independent reflections           | 2695 [R(int) = 0.0939]                         |                   |
| Completeness to theta = 24.997°   | 99.8 %                                         |                   |
| Absorption correction             | Semi-empirical from equivalents                |                   |
| Max. and min. transmission        | 0.7454 and 0.4080                              |                   |
| Refinement method                 | Full-matrix least-squares on F <sup>2</sup>    |                   |
| Data / restraints / parameters    | 2695 / 0 / 202                                 |                   |
| Goodness-of-fit on F <sup>2</sup> | 1.047                                          |                   |
| Final R indices [I > 2σ(I)]       | R1 = 0.0599, wR2 = 0.1440                      |                   |
| R indices (all data)              | R1 = 0.0911, wR2 = 0.1702                      |                   |
| Extinction coefficient            | n/a                                            |                   |
| Largest diff. peak and hole       | 0.192 and -0.207 e.Å <sup>-3</sup>             |                   |

### Analytical Data:

Compounds **5a**,<sup>S1</sup> (**5b,g**),<sup>S2</sup> **6a**,<sup>S3</sup> (**7b**, and **8a,n**)<sup>S4</sup> are known in literature and thus only <sup>1</sup>H NMR data of these compounds are provided.

### References:

(S1) Oger, N.; Grogne, E. L.; Felpin, F.-X. *J. Org. Chem.* **2014**, 79, 8255.

(S2) Padala, K.; Pimparkar, S.; Madasamy, P.; Jeganmohan, M. *Chem. Commun.* **2012**, 48, 7140.

(S3) Ueyama, T.; Mochida, S.; Fukutani, T.; Hirano, K.; Satoh, T.; Miura, M. *Org. Lett.* **2011**, 13, 706.

(S4) Mandal, A.; Mehta, G.; Dana, S.; Baidya, M. *Org. Lett.* **2019**, 21, 5879.

## NMR Spectra of Synthesized Compounds

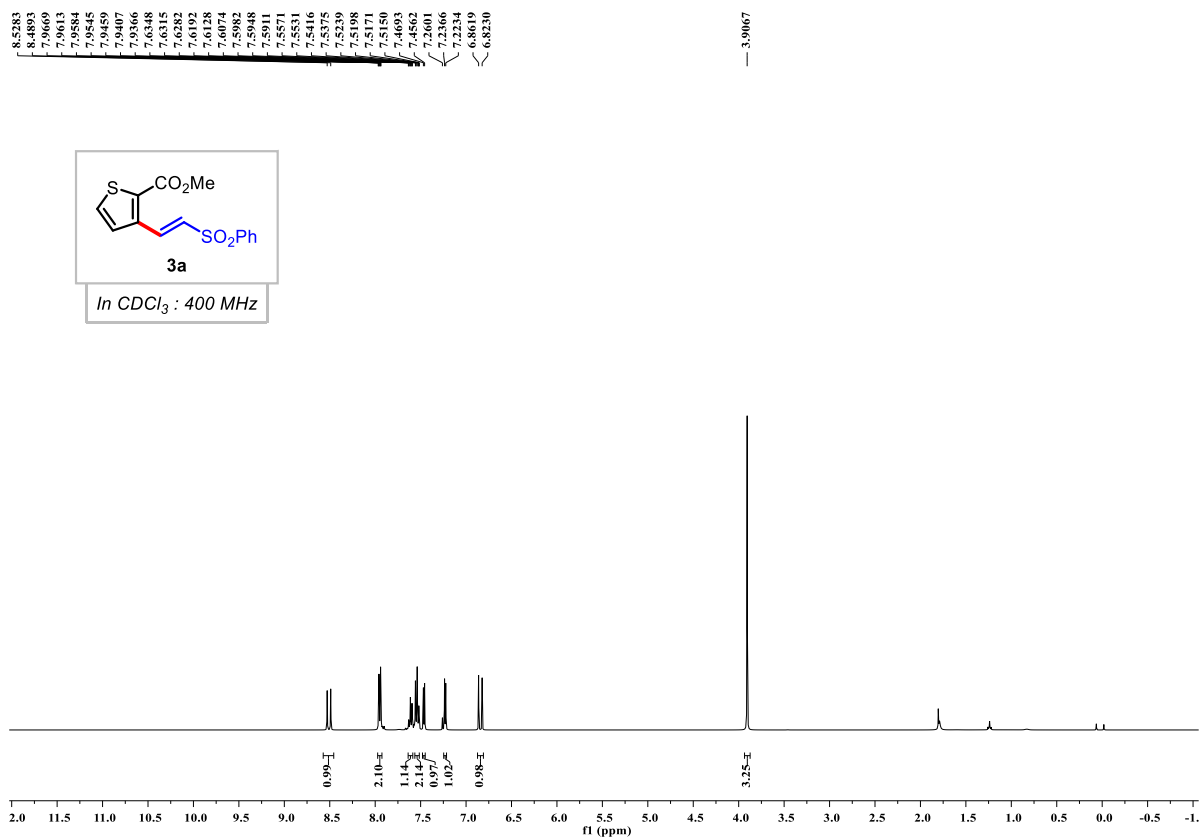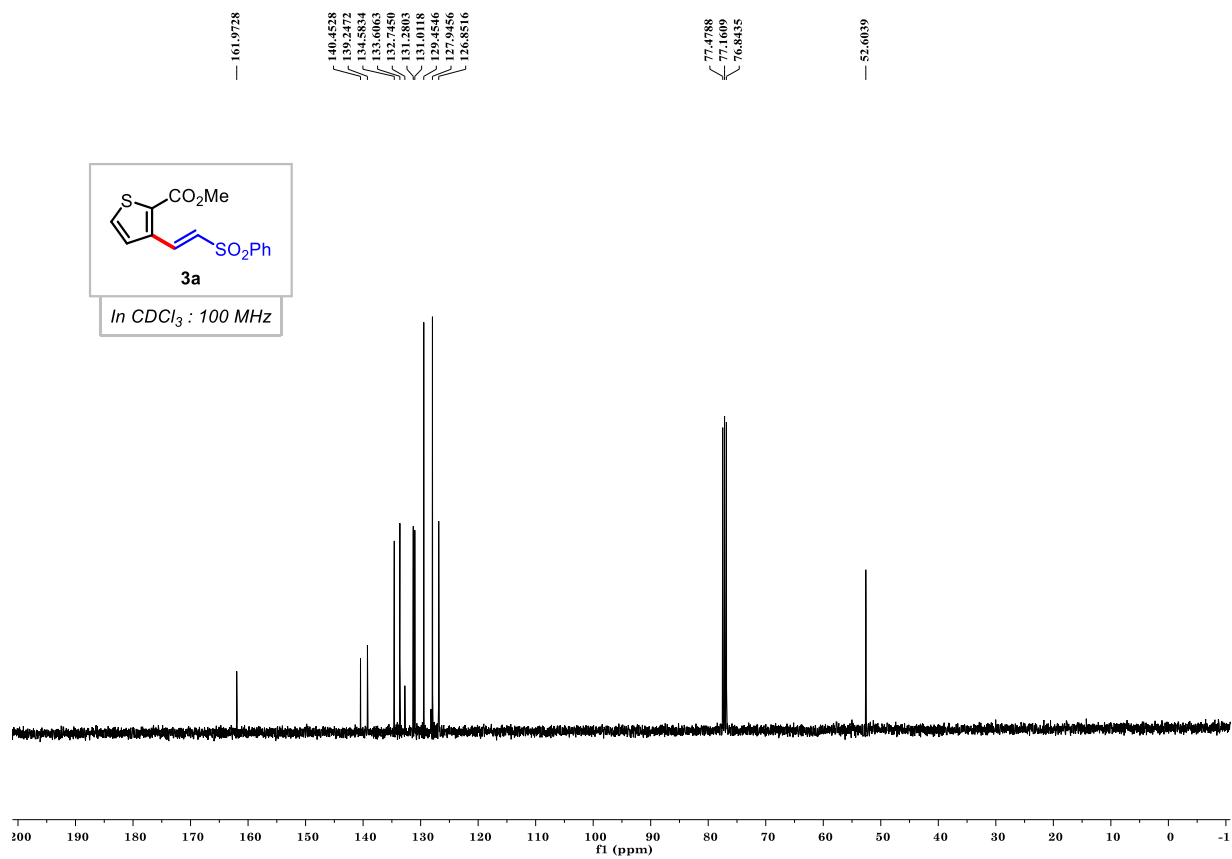

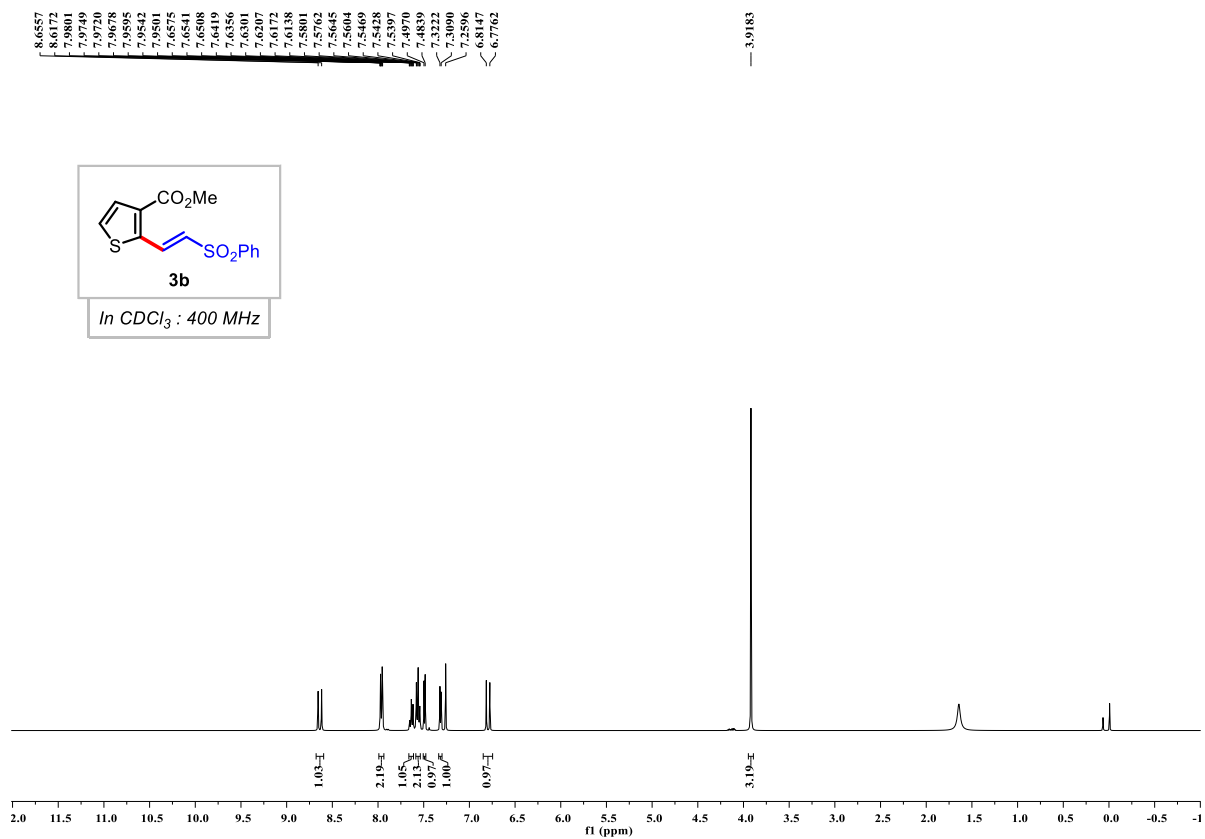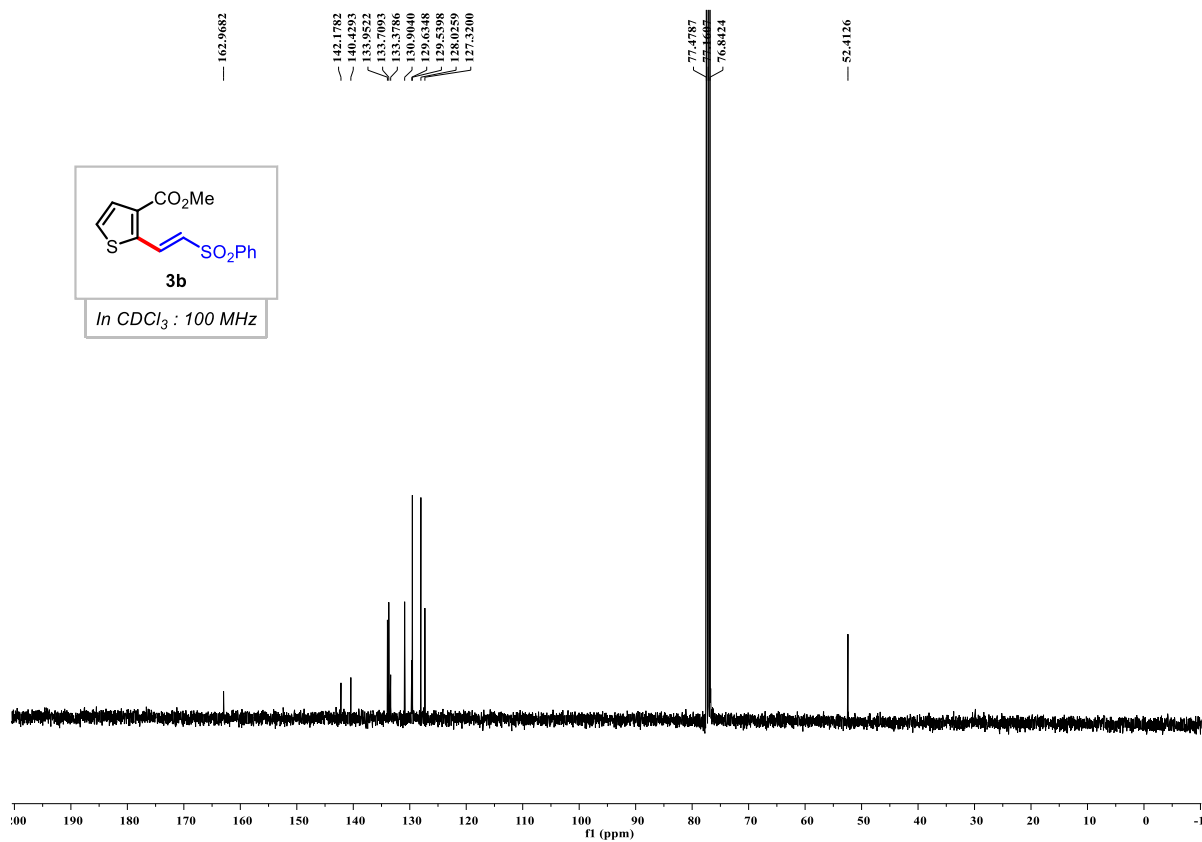

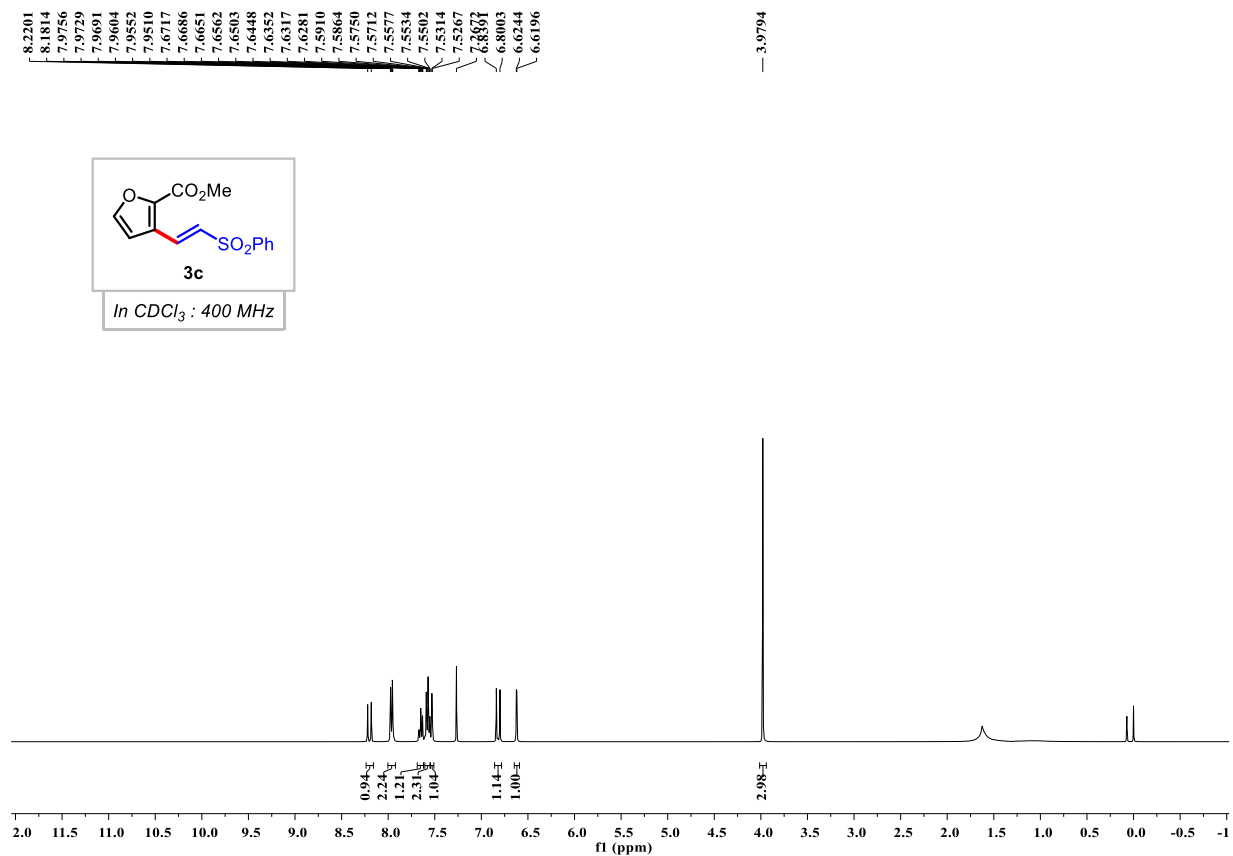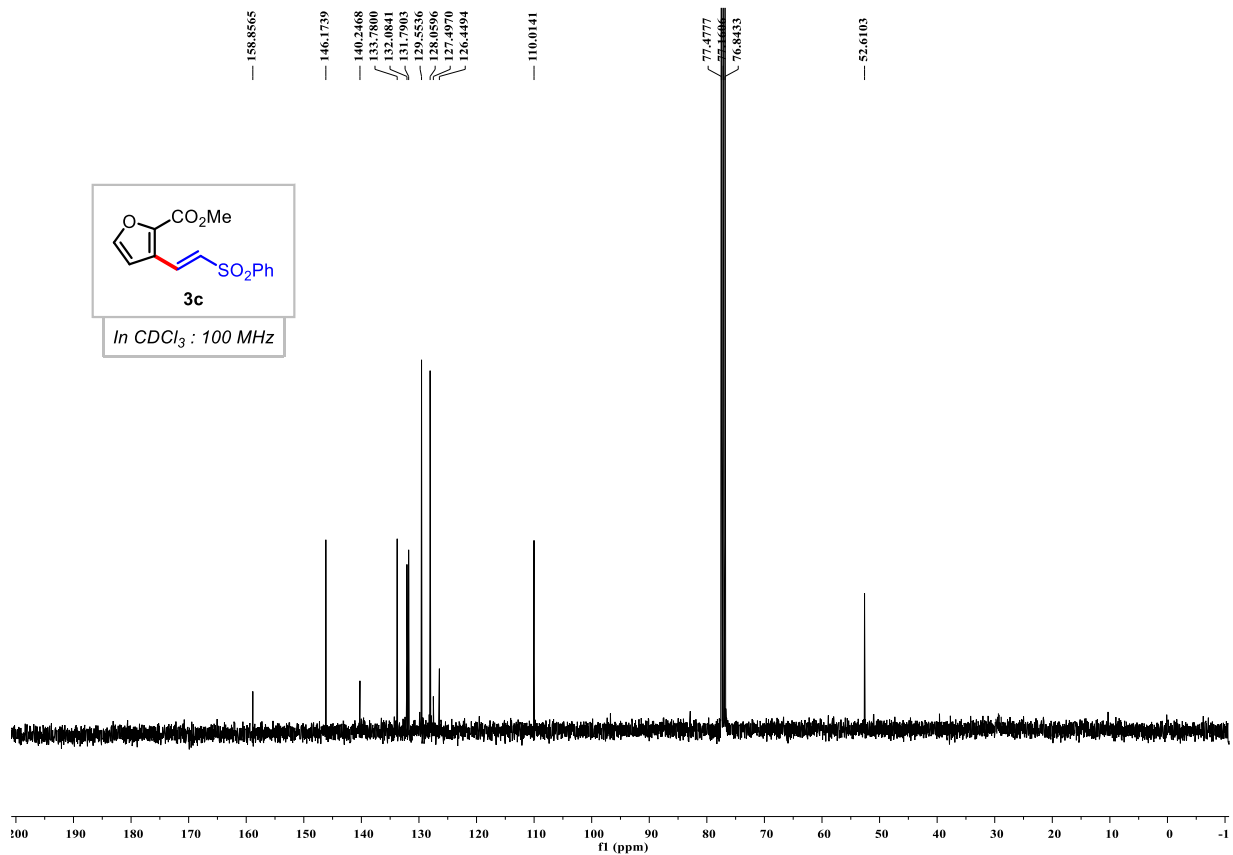

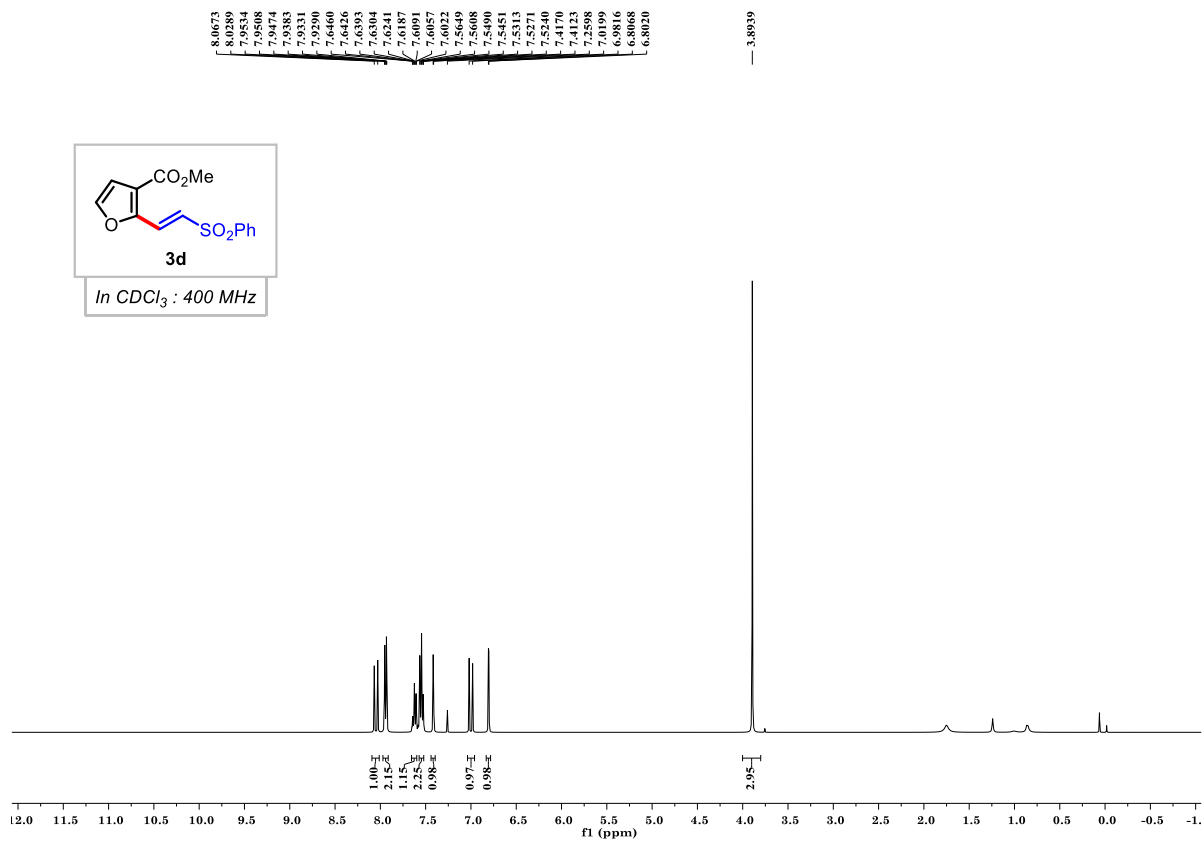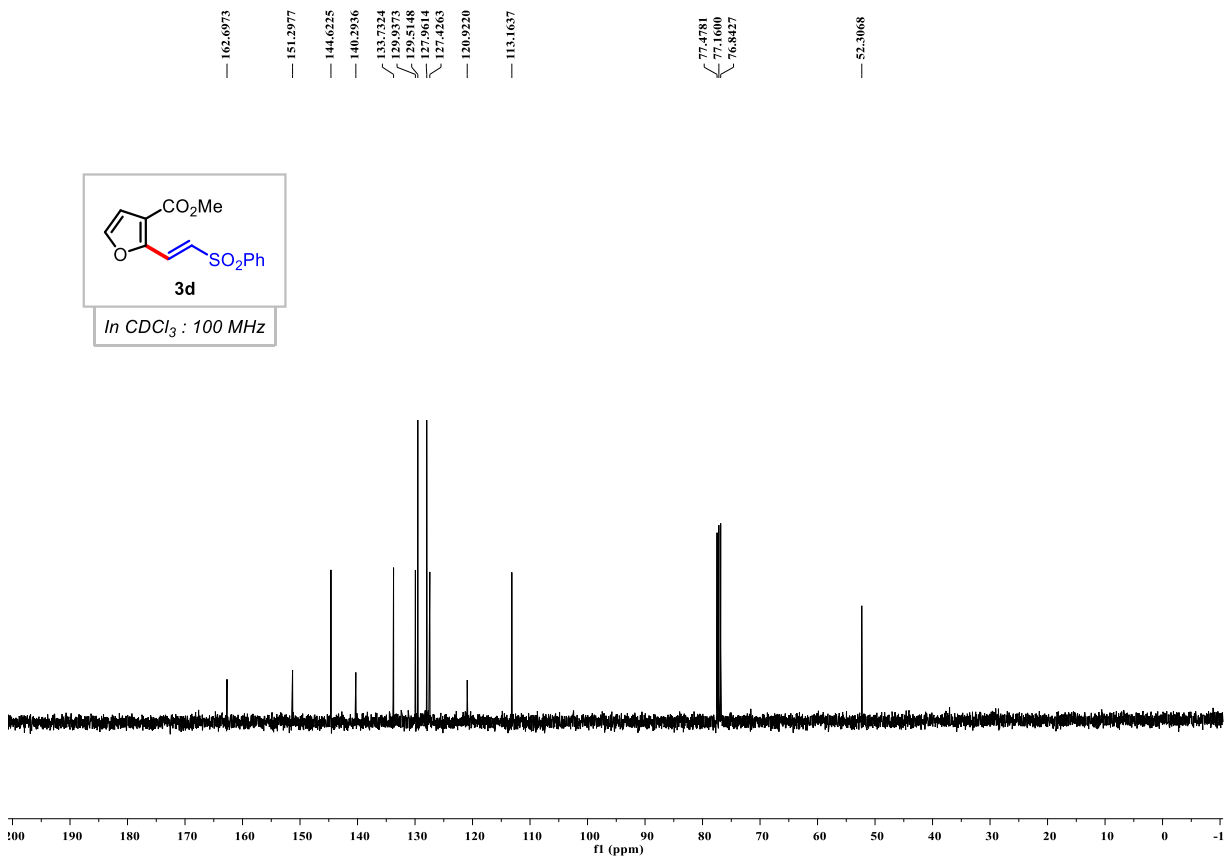

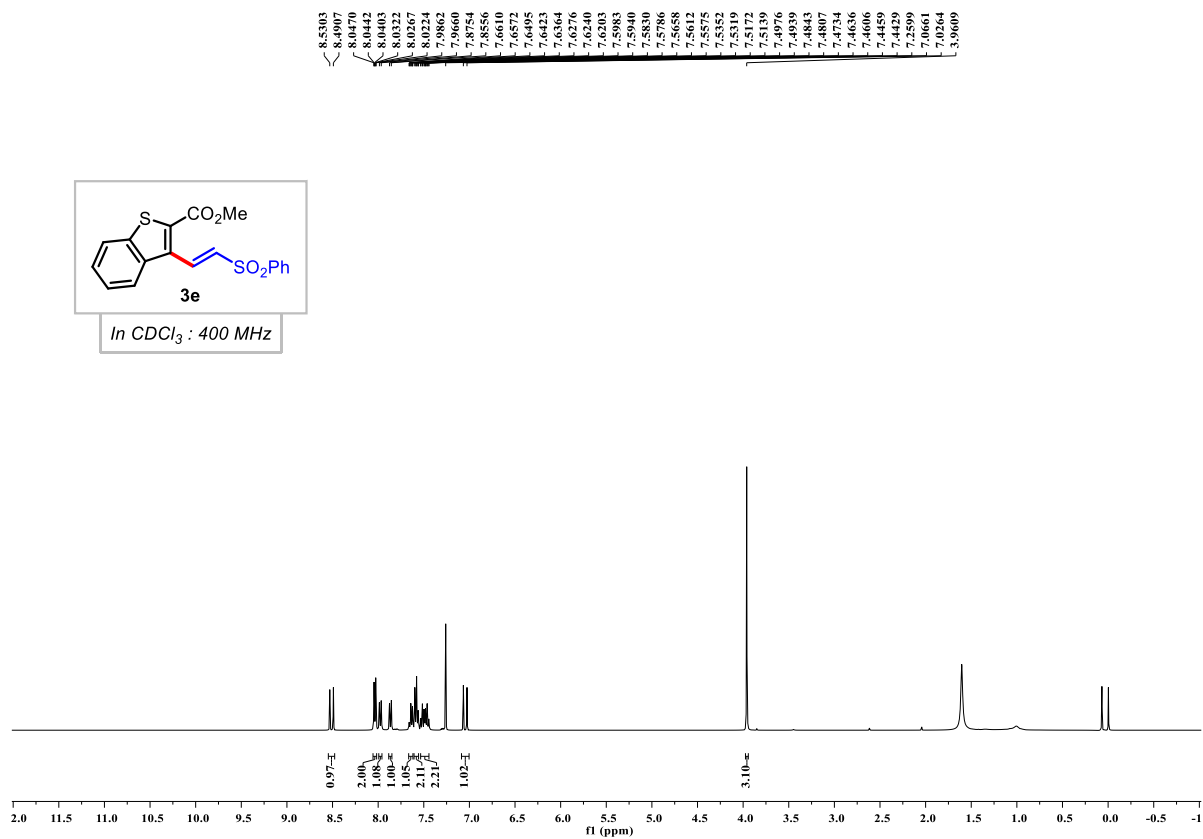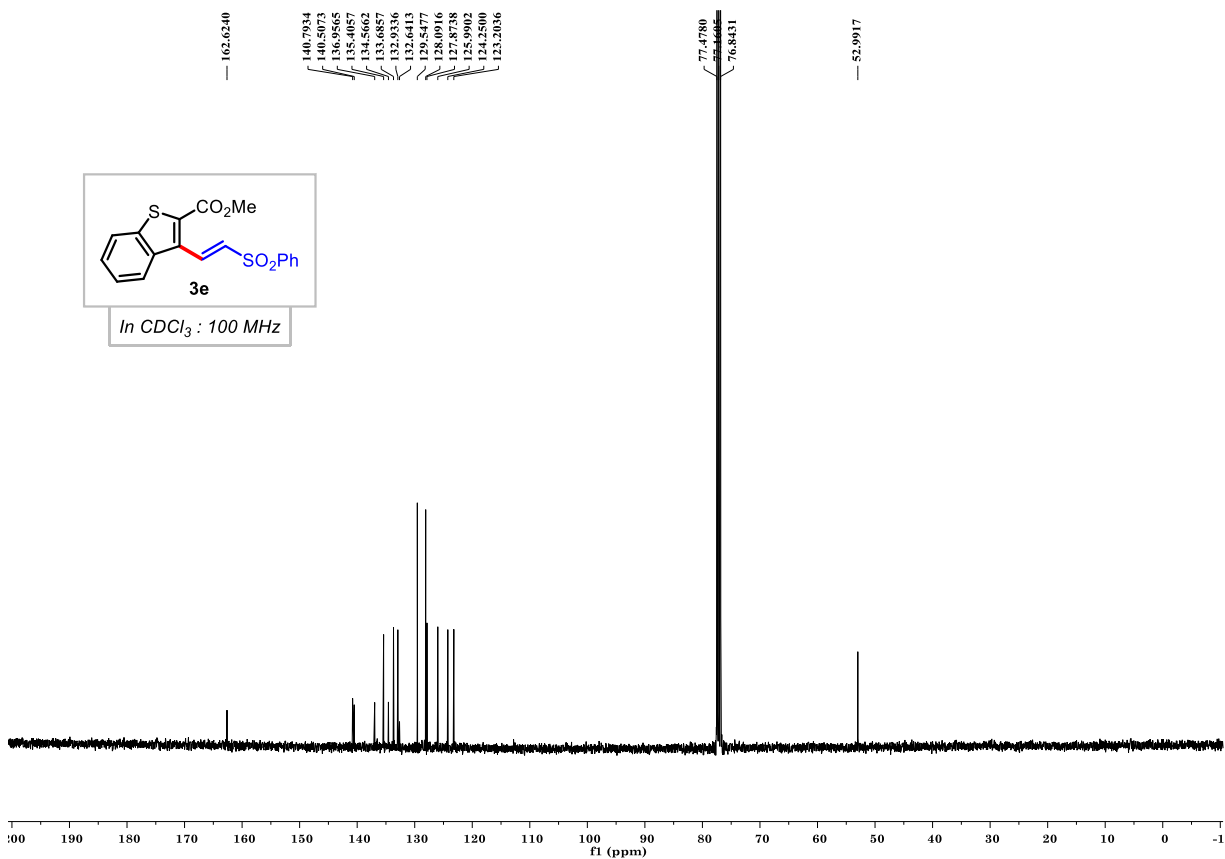



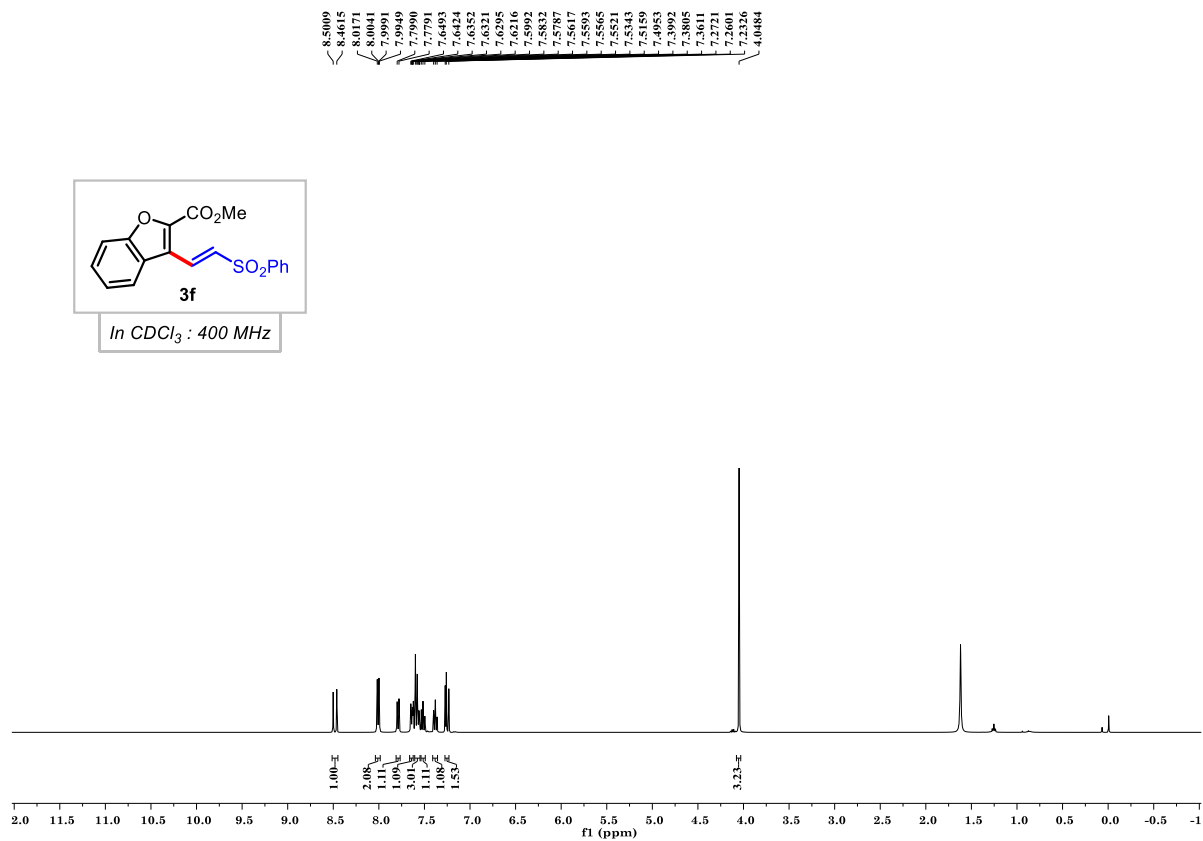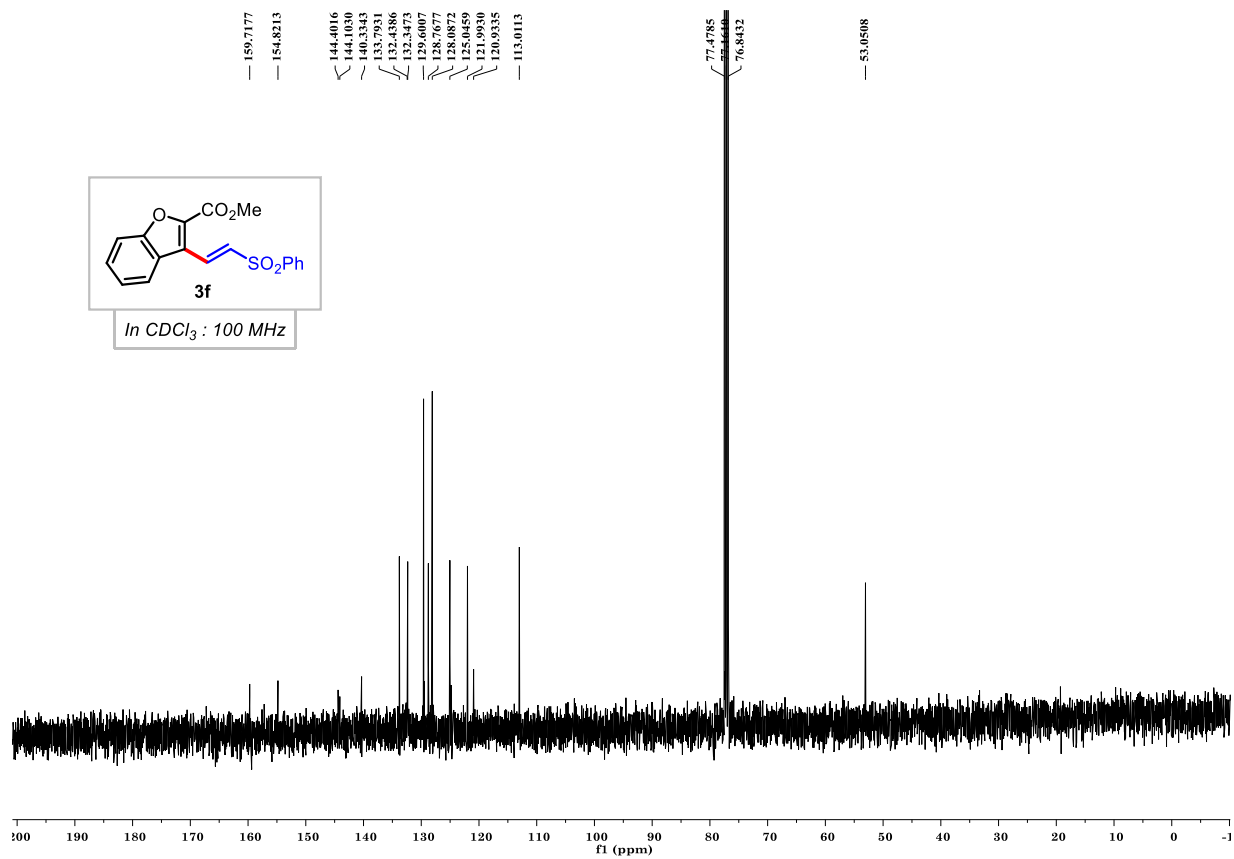

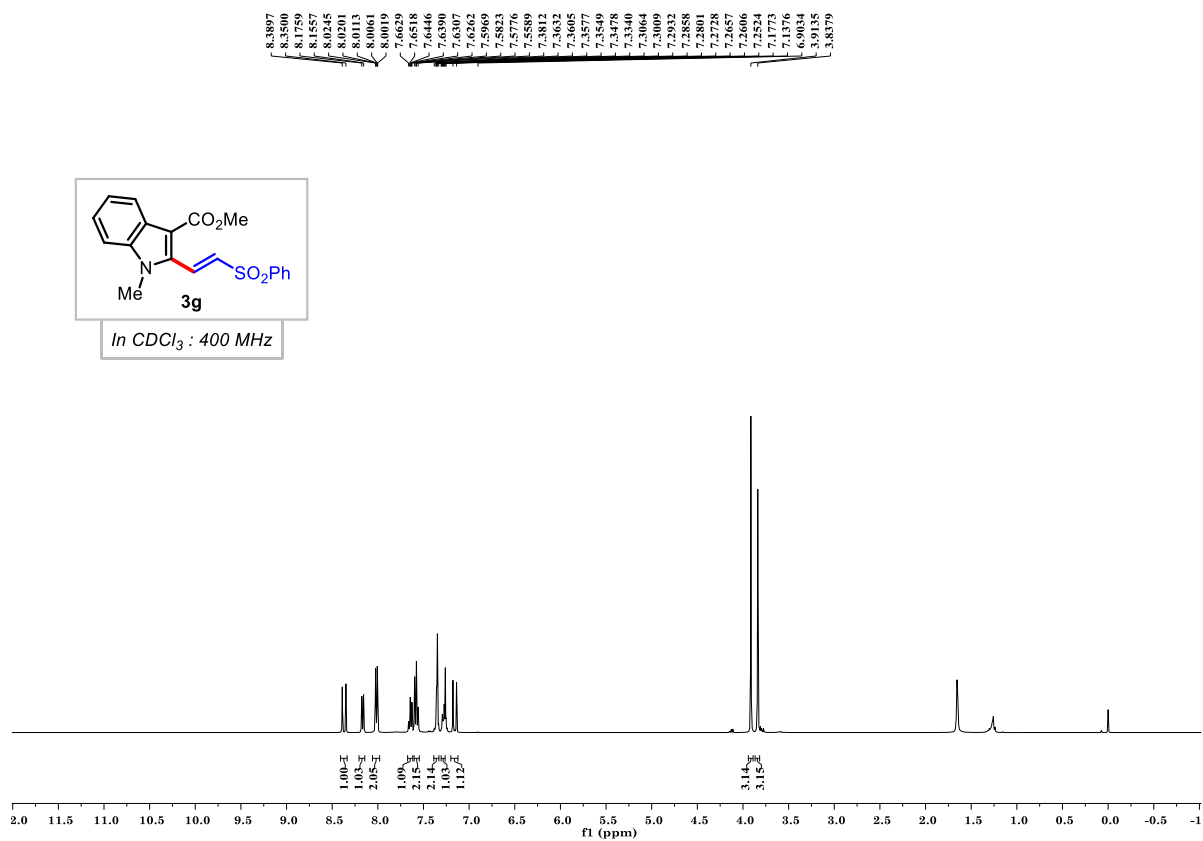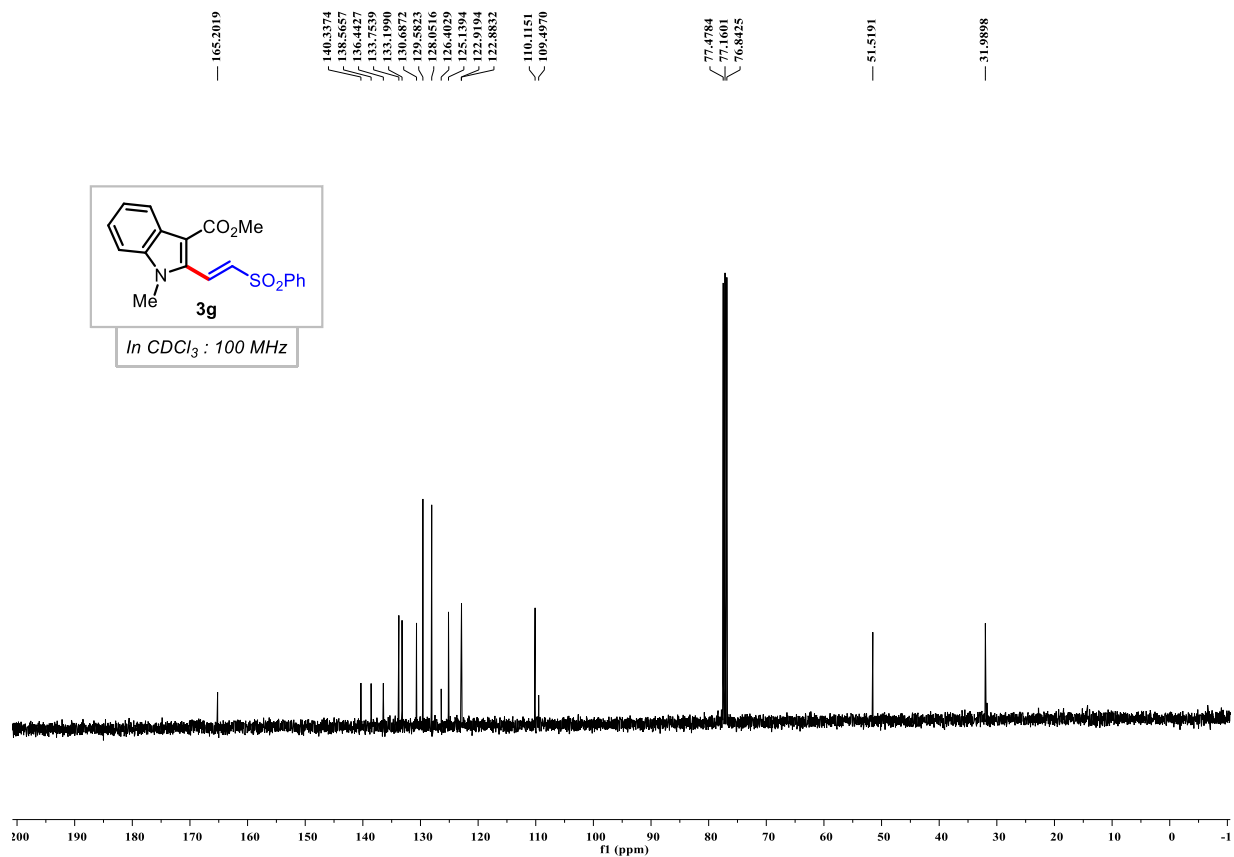

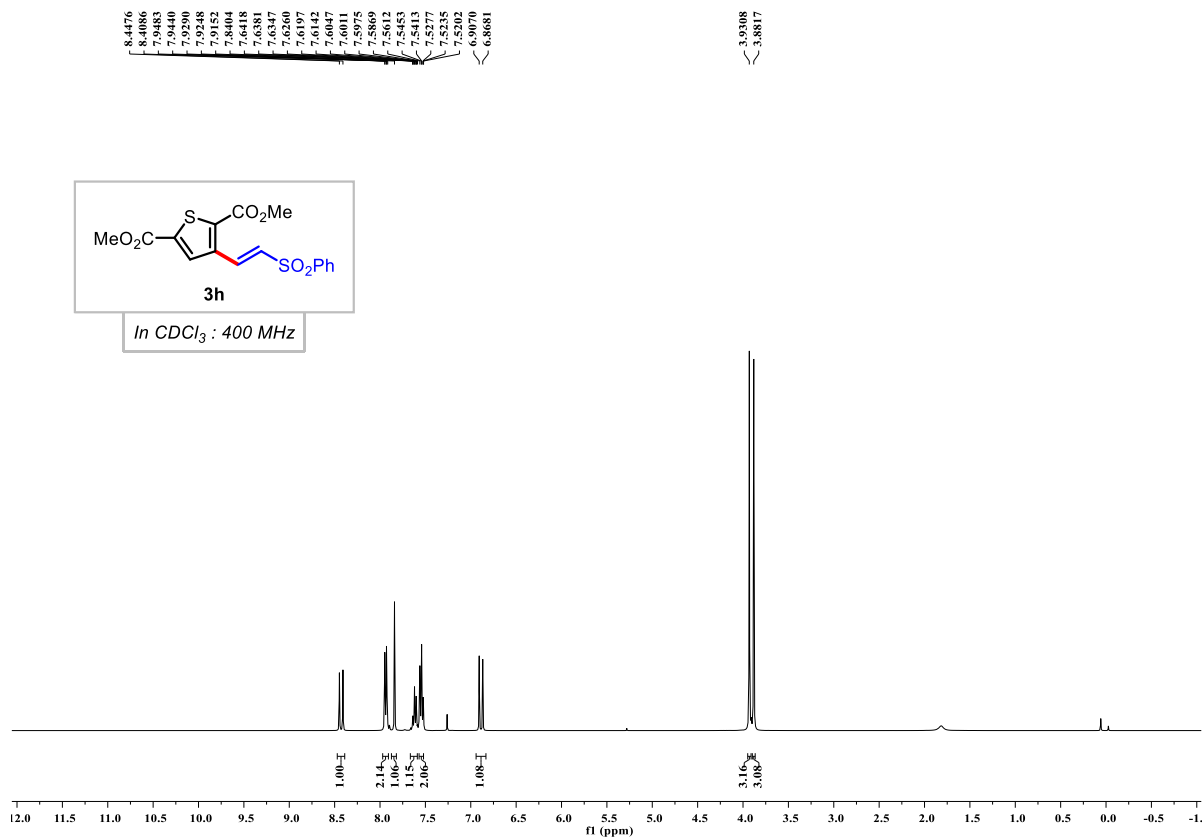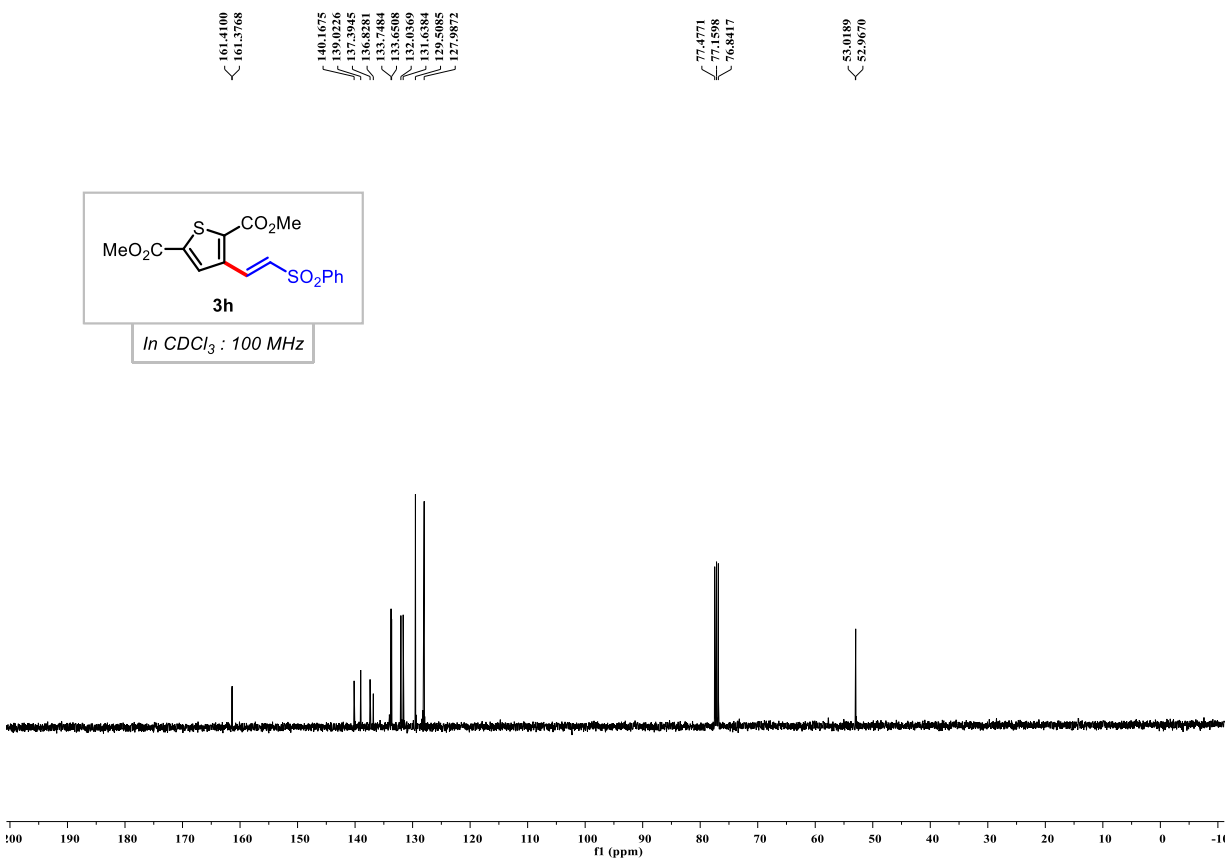

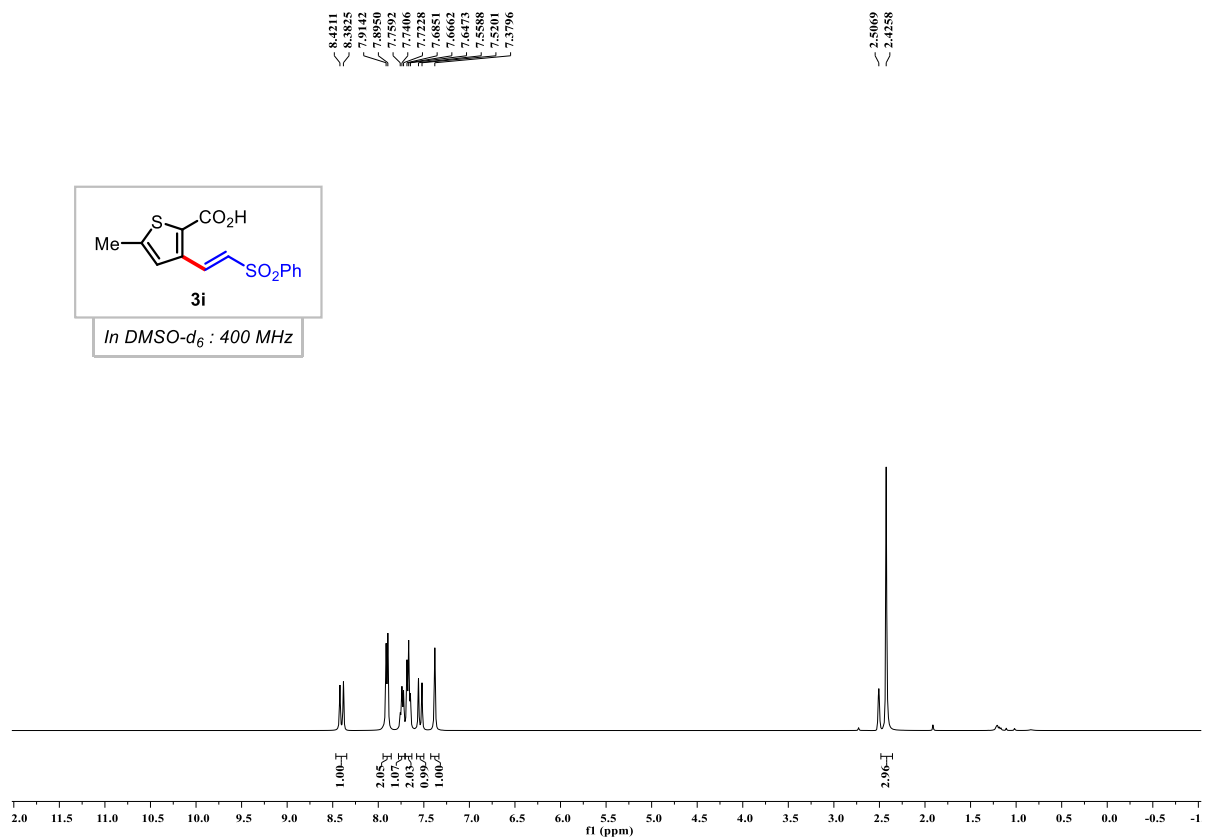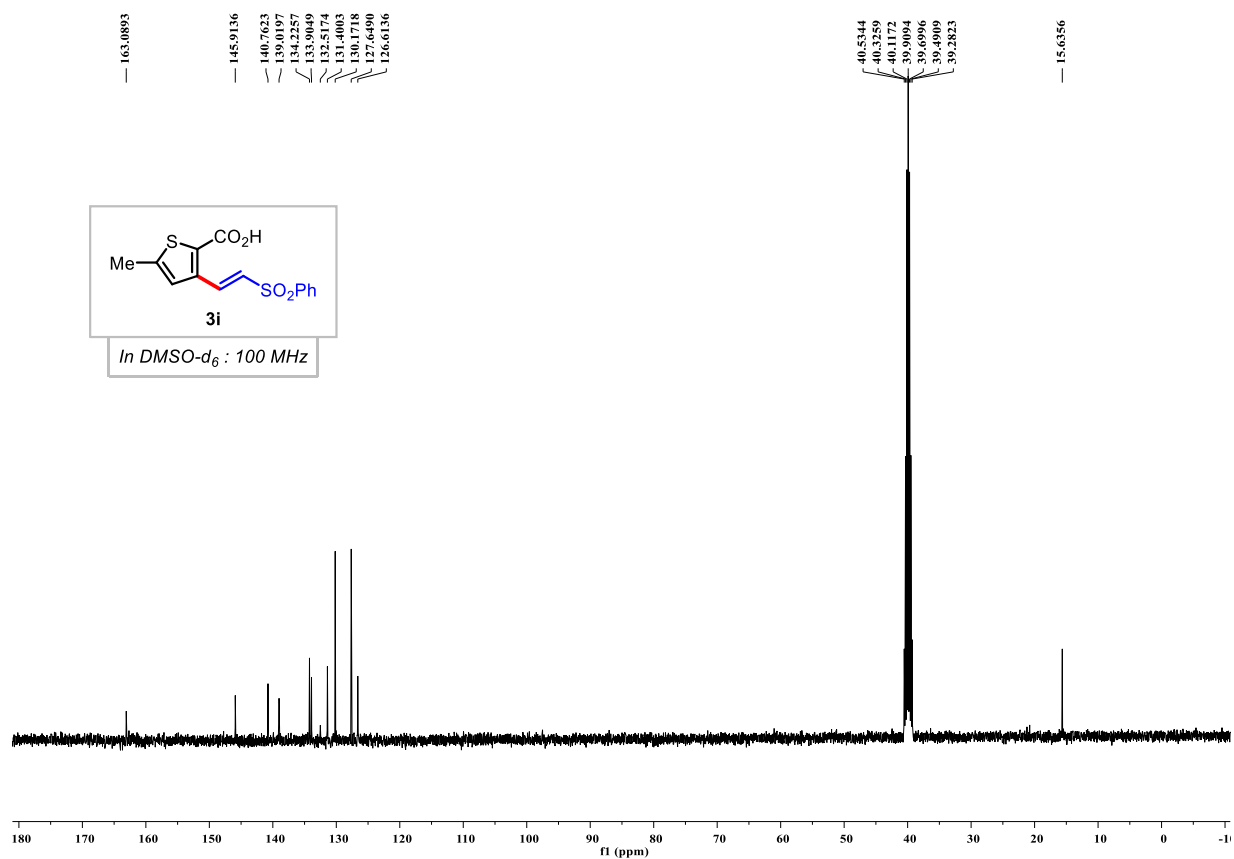

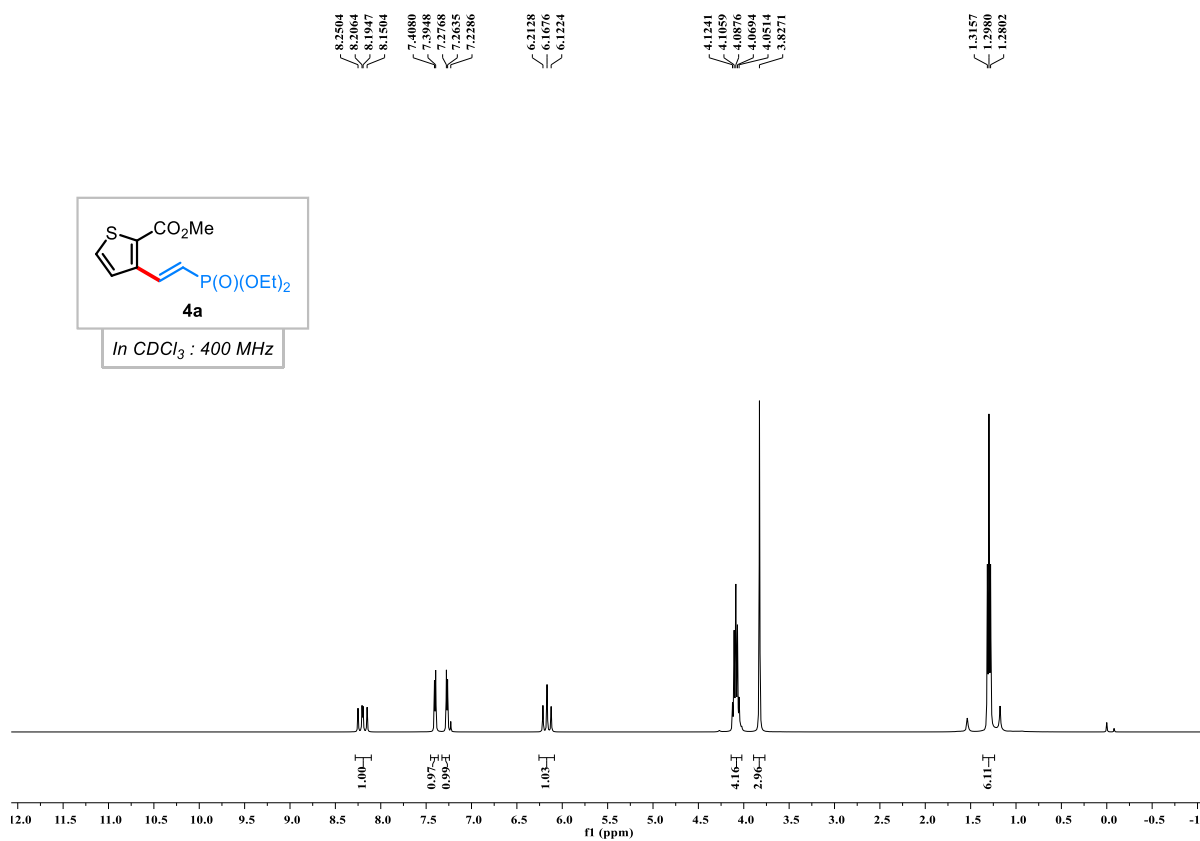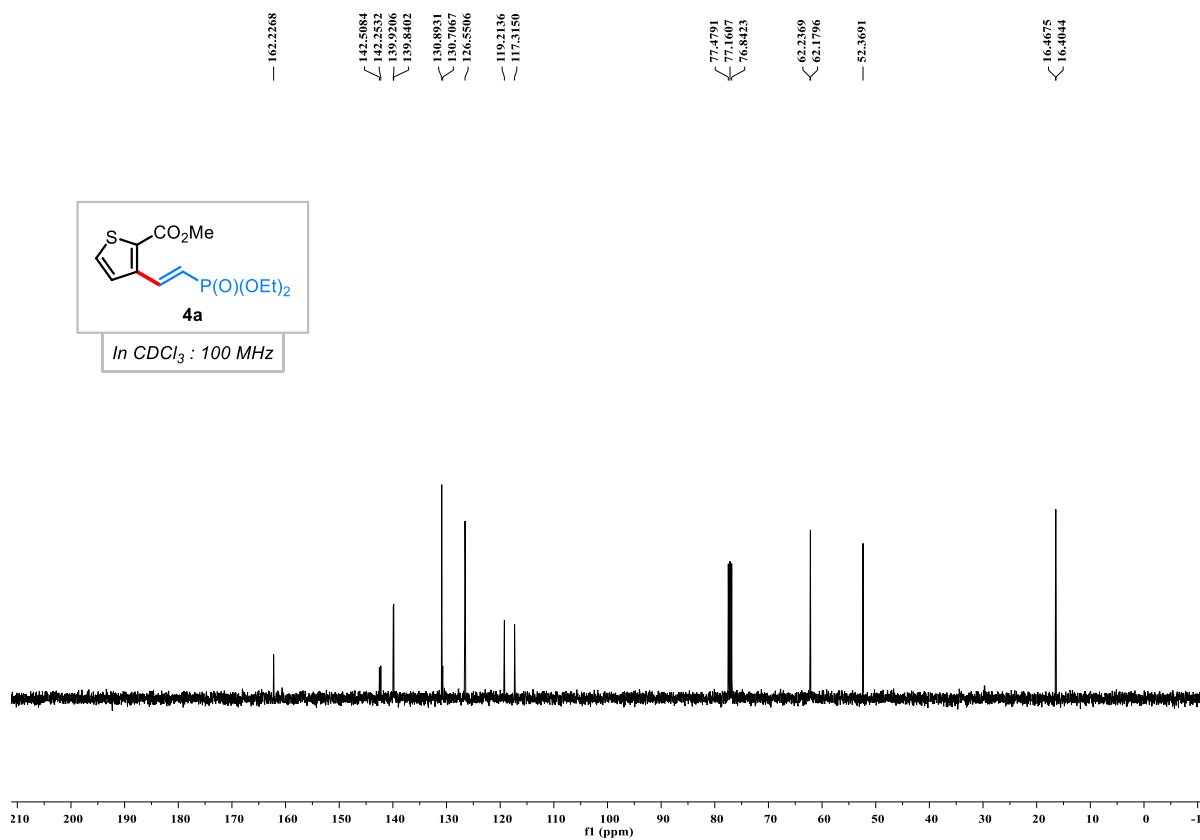

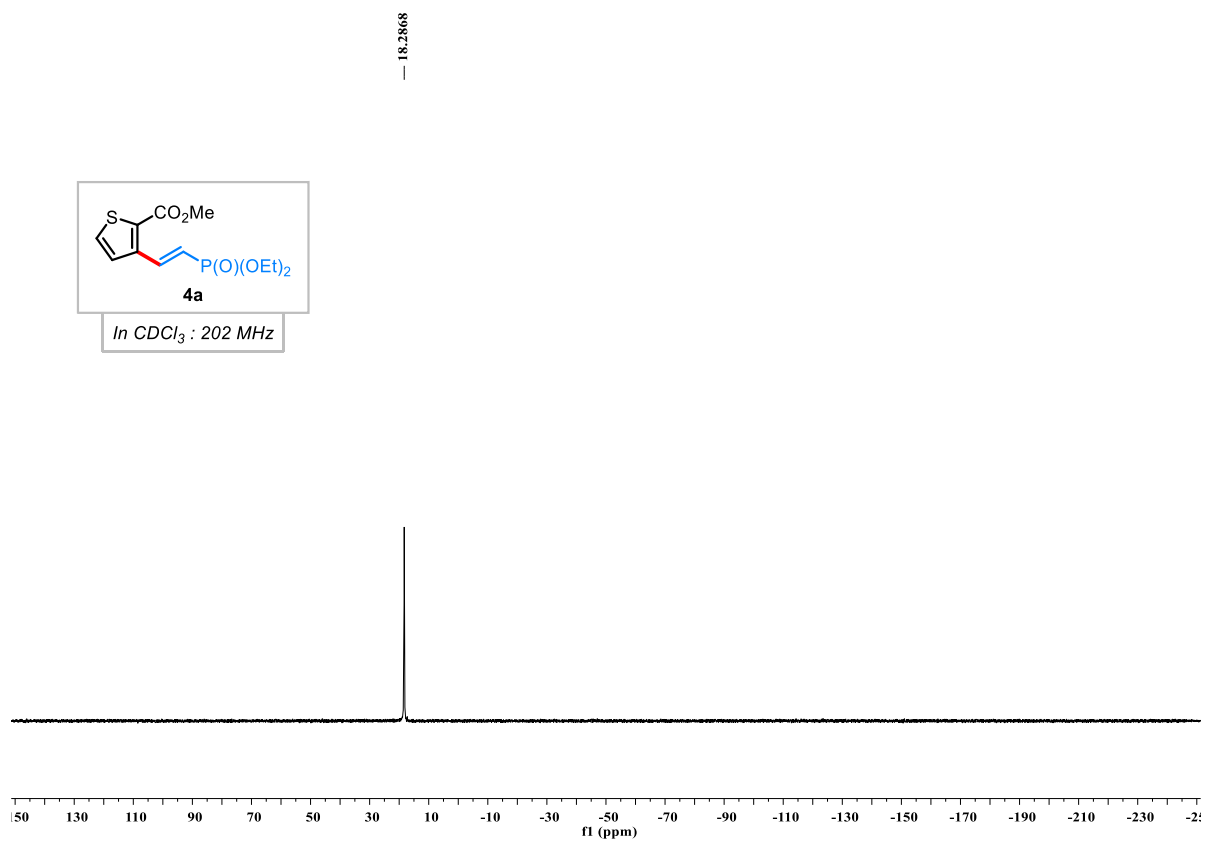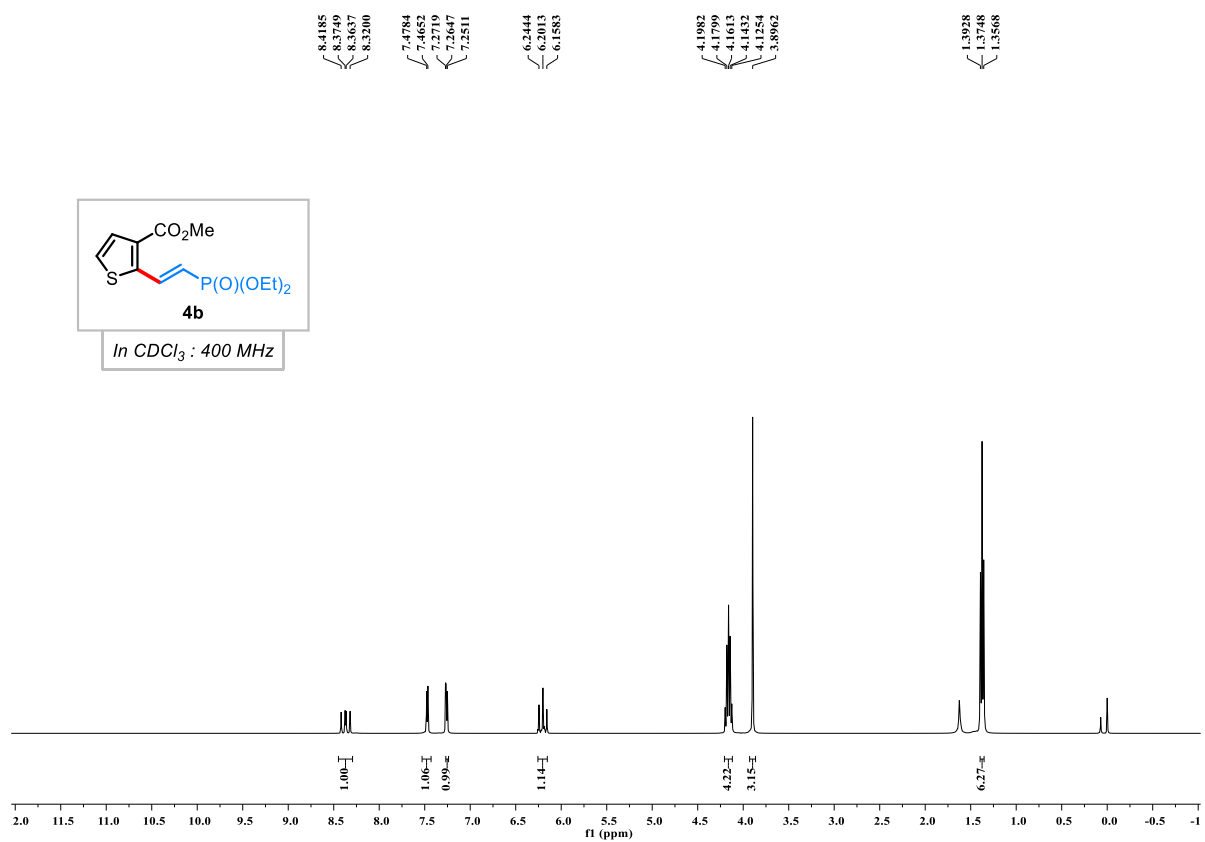

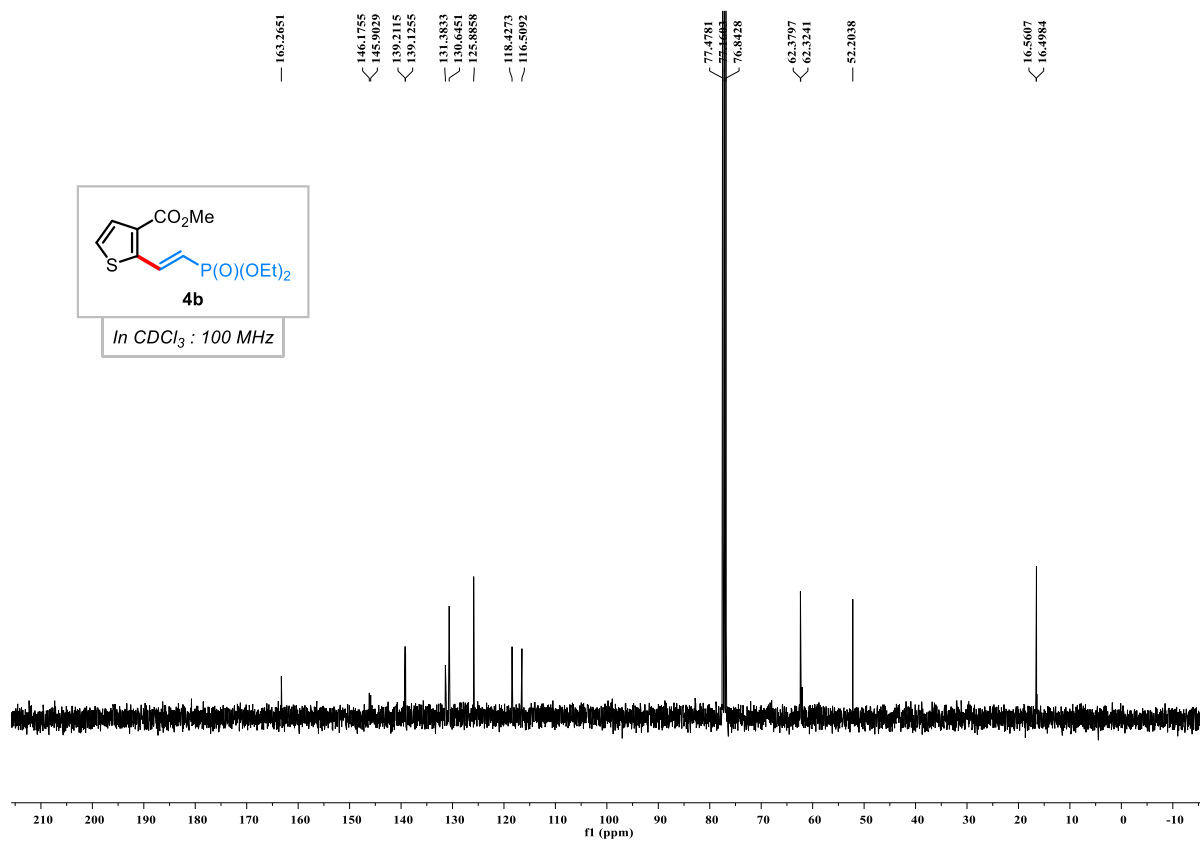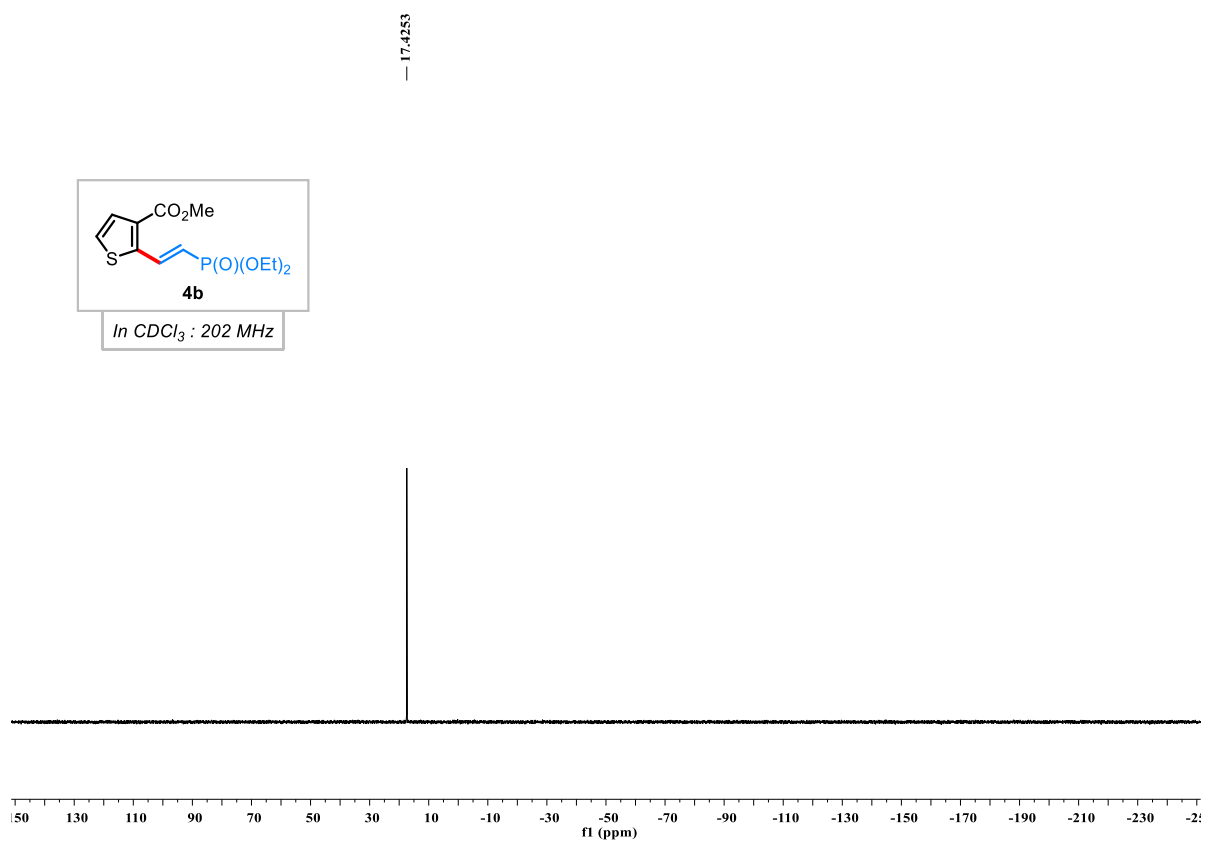

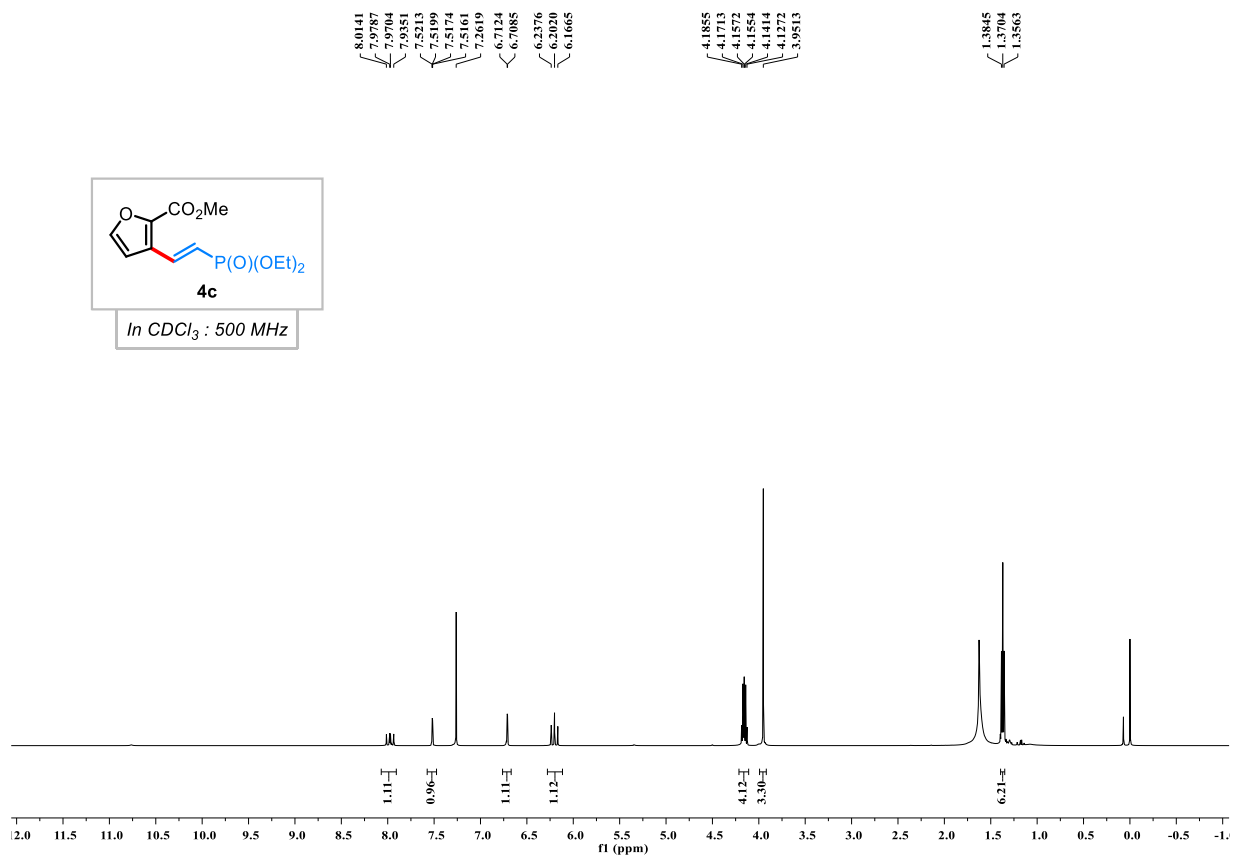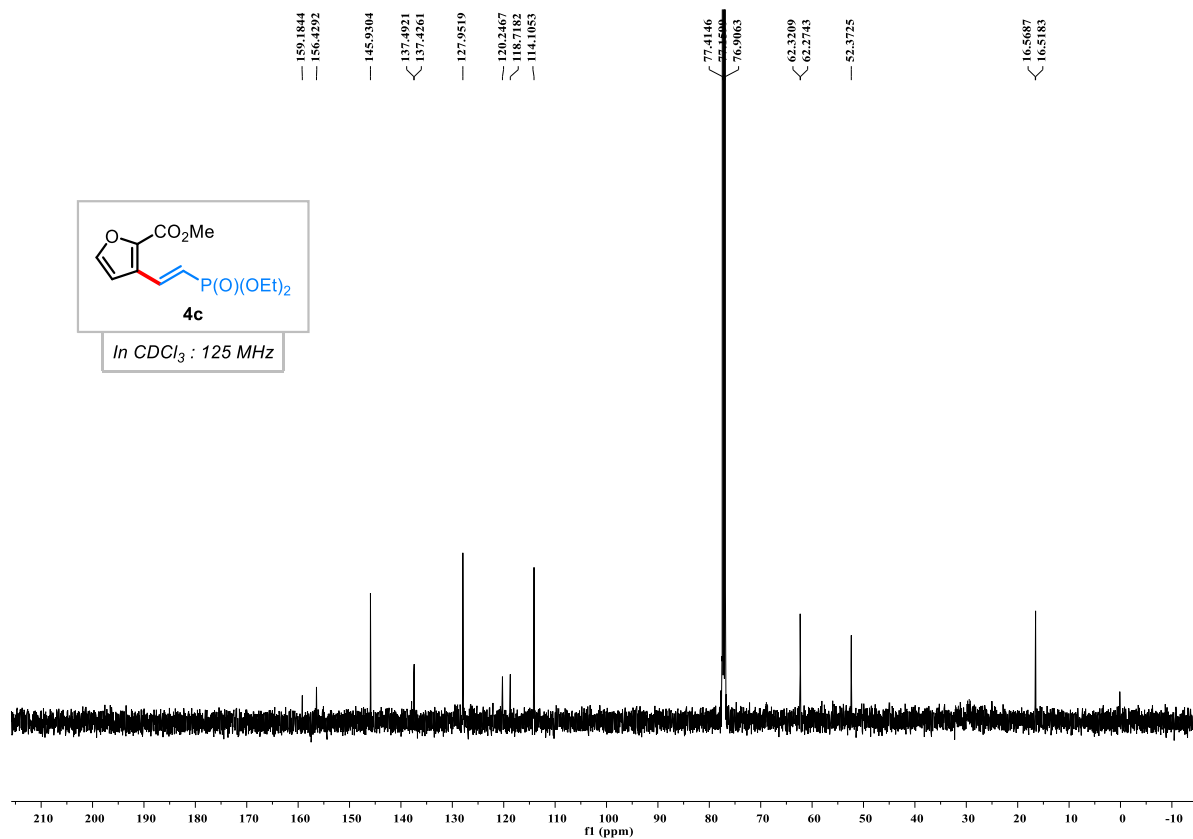



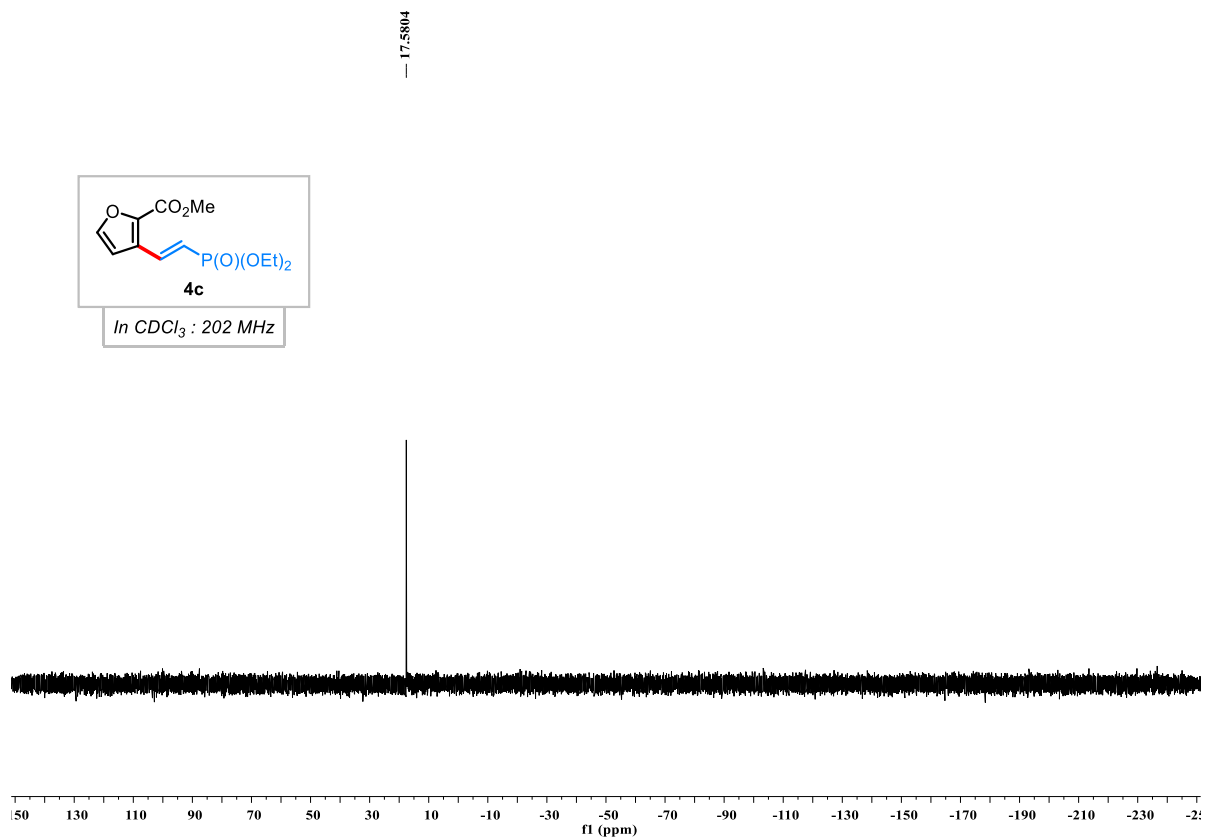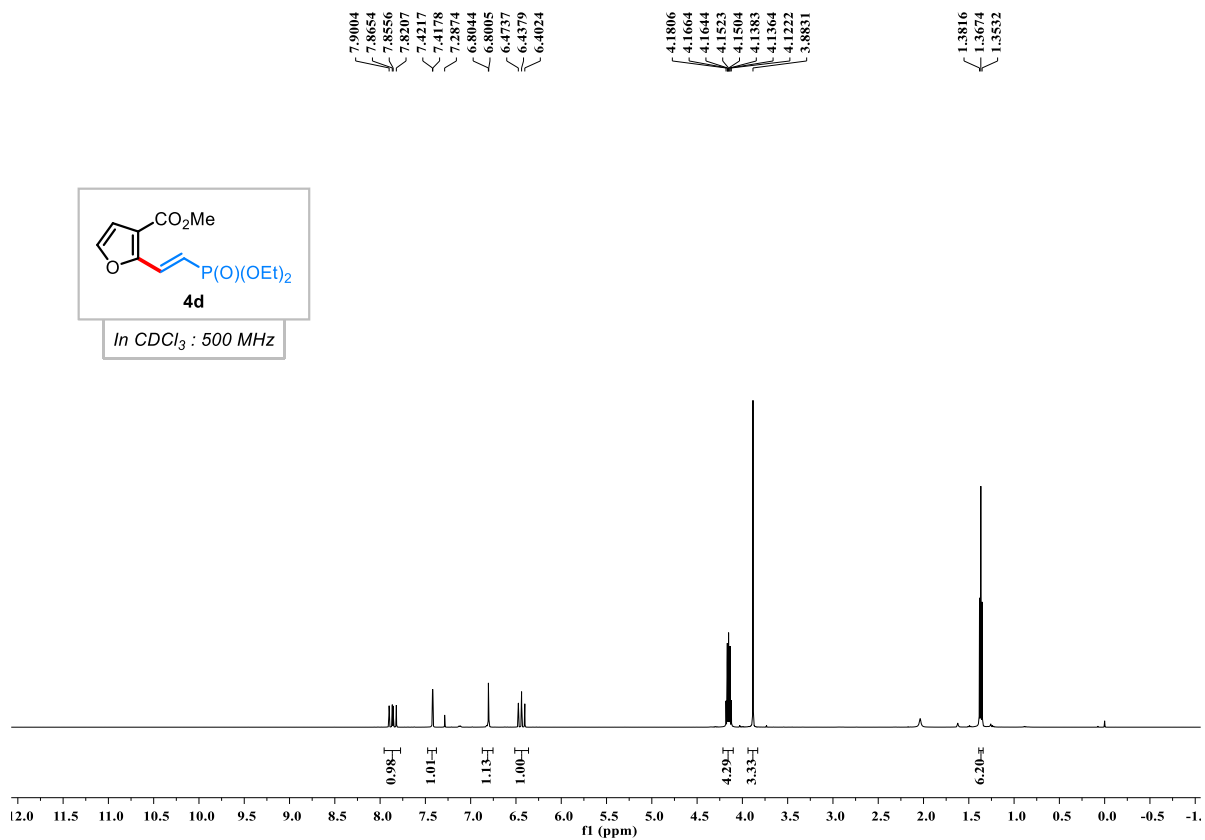

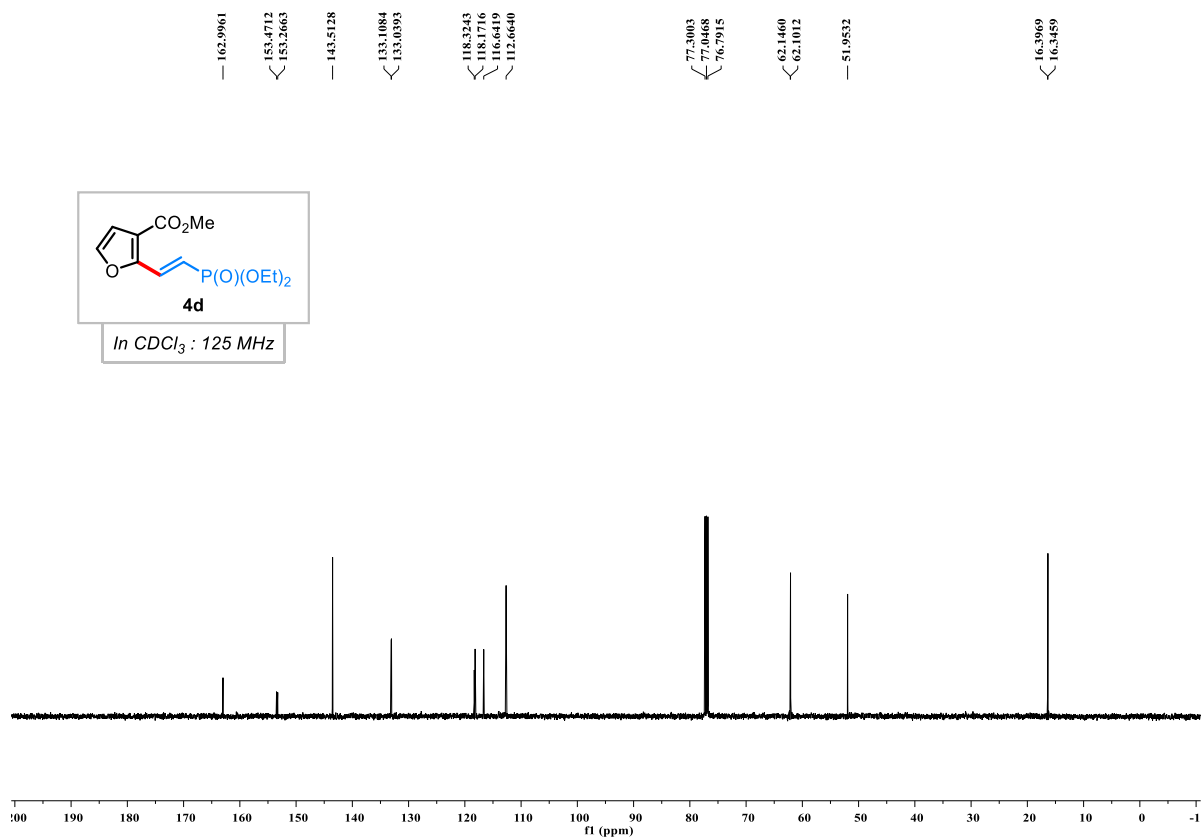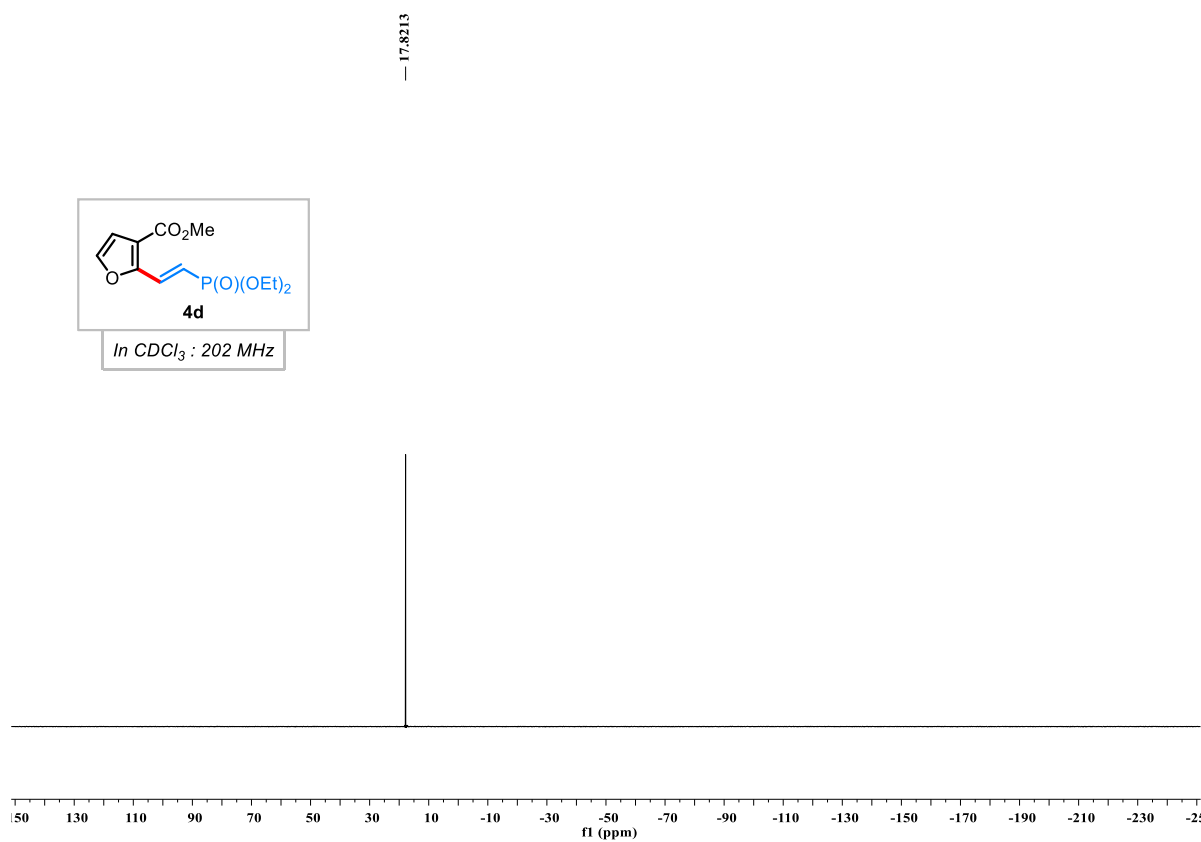

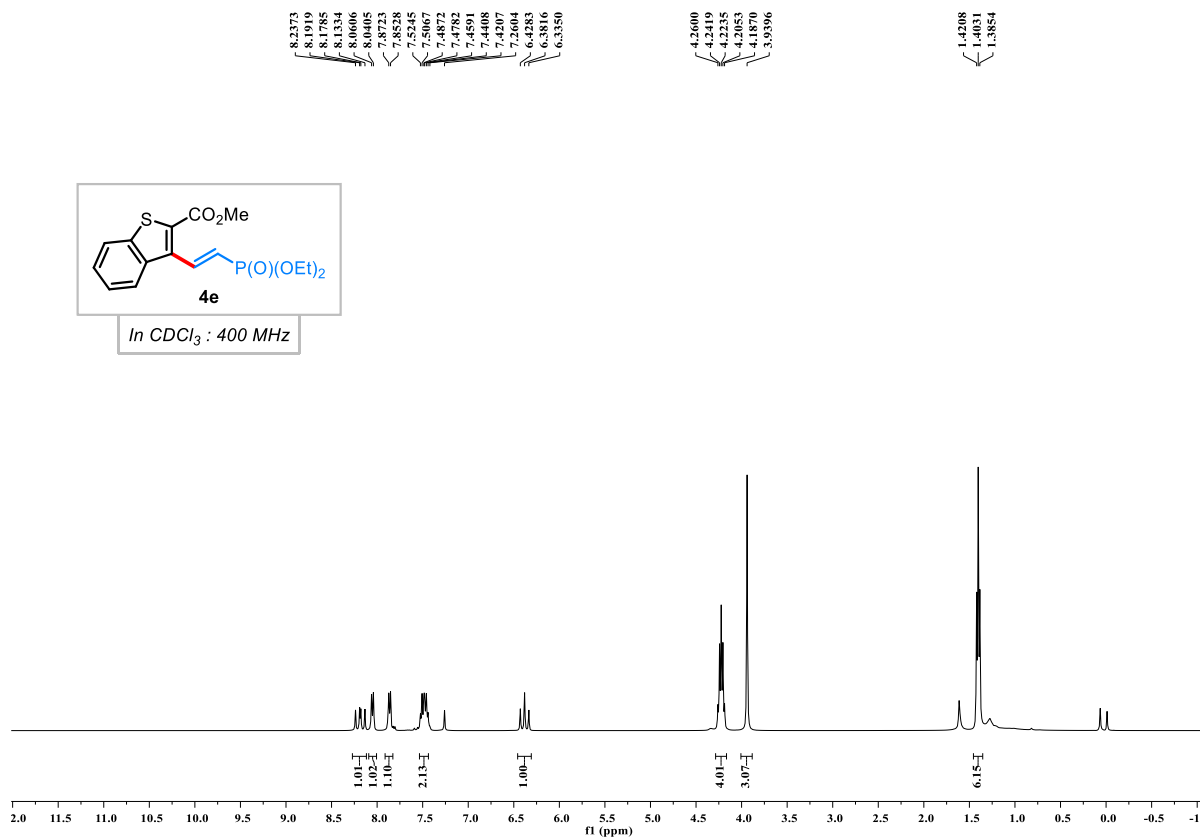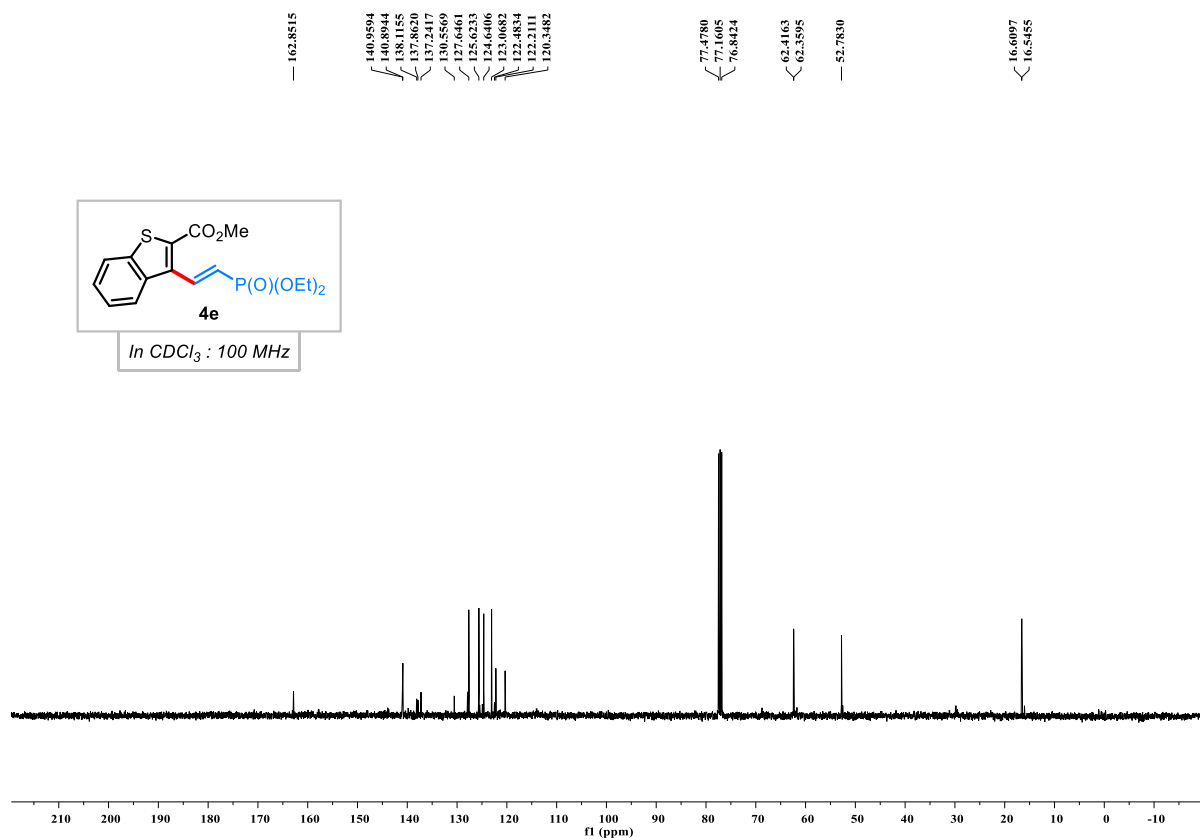

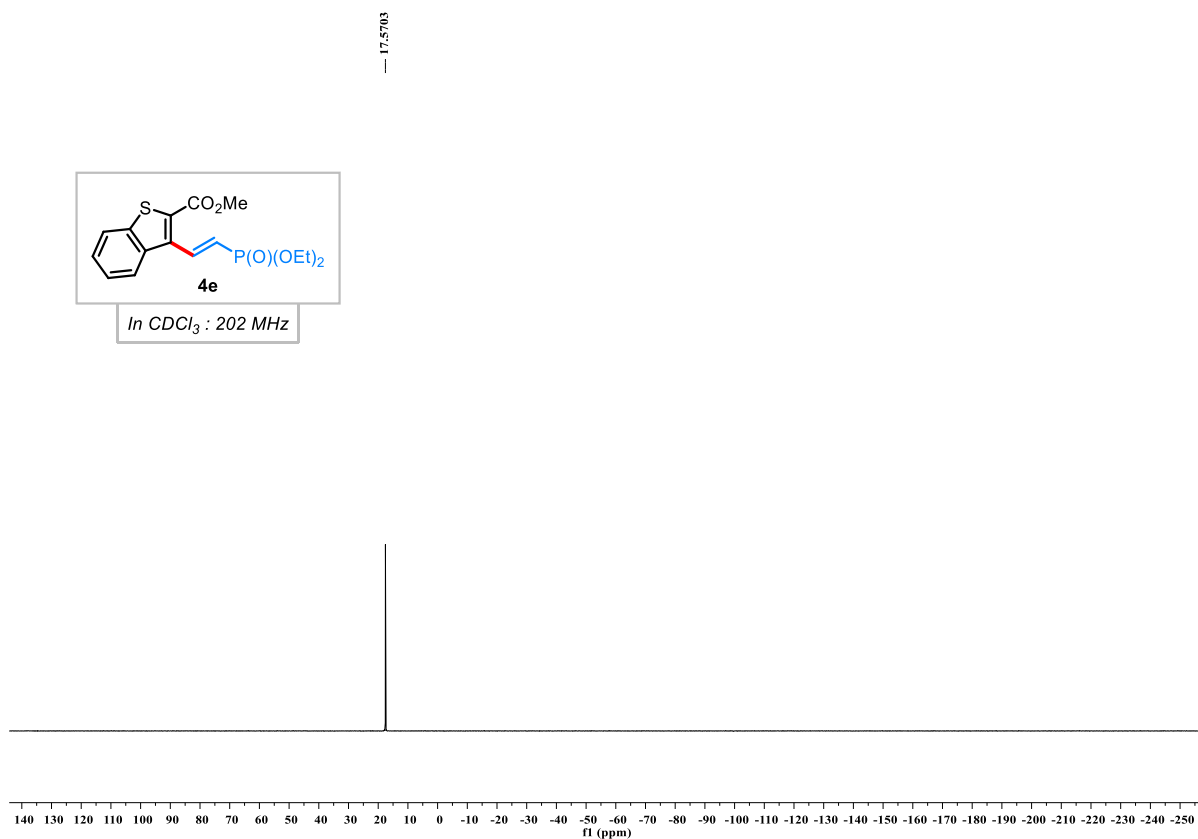

8.2733  
 8.2284  
 8.1752  
 8.1703  
 7.9309  
 7.9109  
 7.6216  
 7.6006  
 7.5341  
 7.5310  
 7.5161  
 7.5129  
 7.5096  
 7.4950  
 7.4918  
 7.4118  
 7.4091  
 7.3918  
 7.3890  
 7.3737  
 7.3711  
 7.2598  
 6.6881  
 6.6430  
 6.5979

4.2333  
 4.2150  
 4.1970  
 4.1752  
 4.1604  
 4.0226

1.4112  
 1.3935  
 1.3758

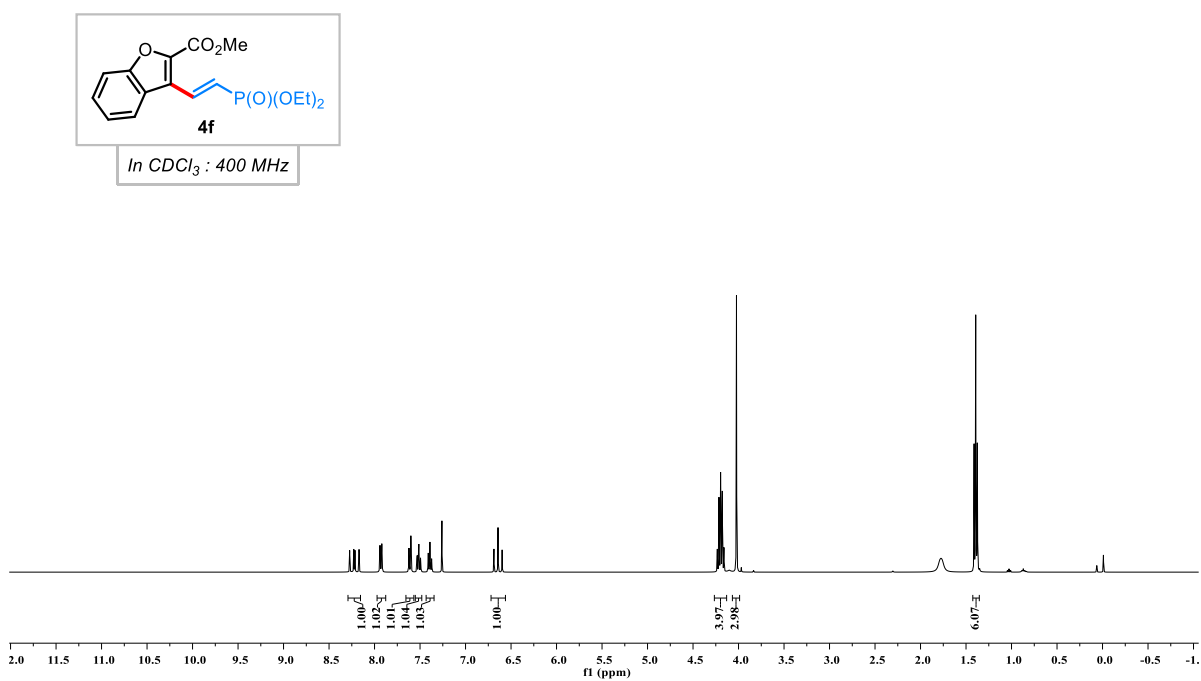

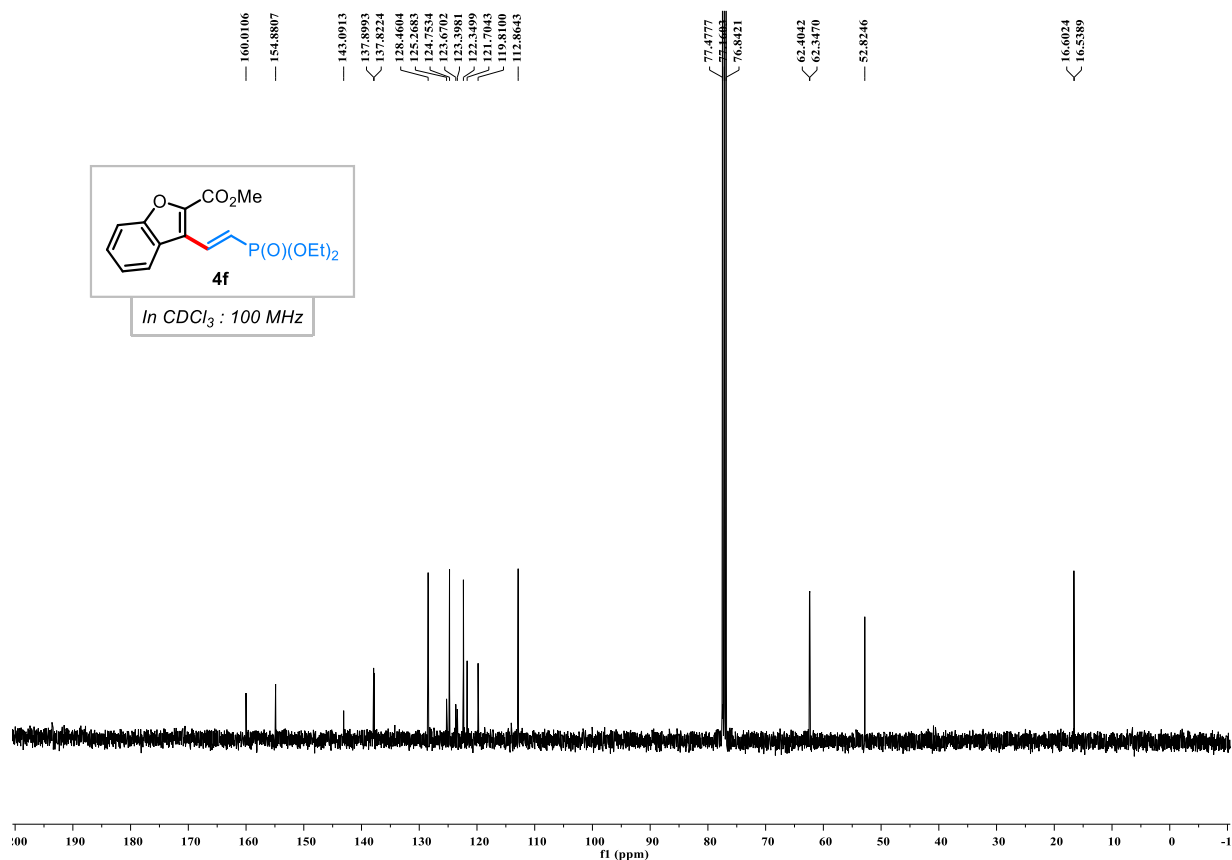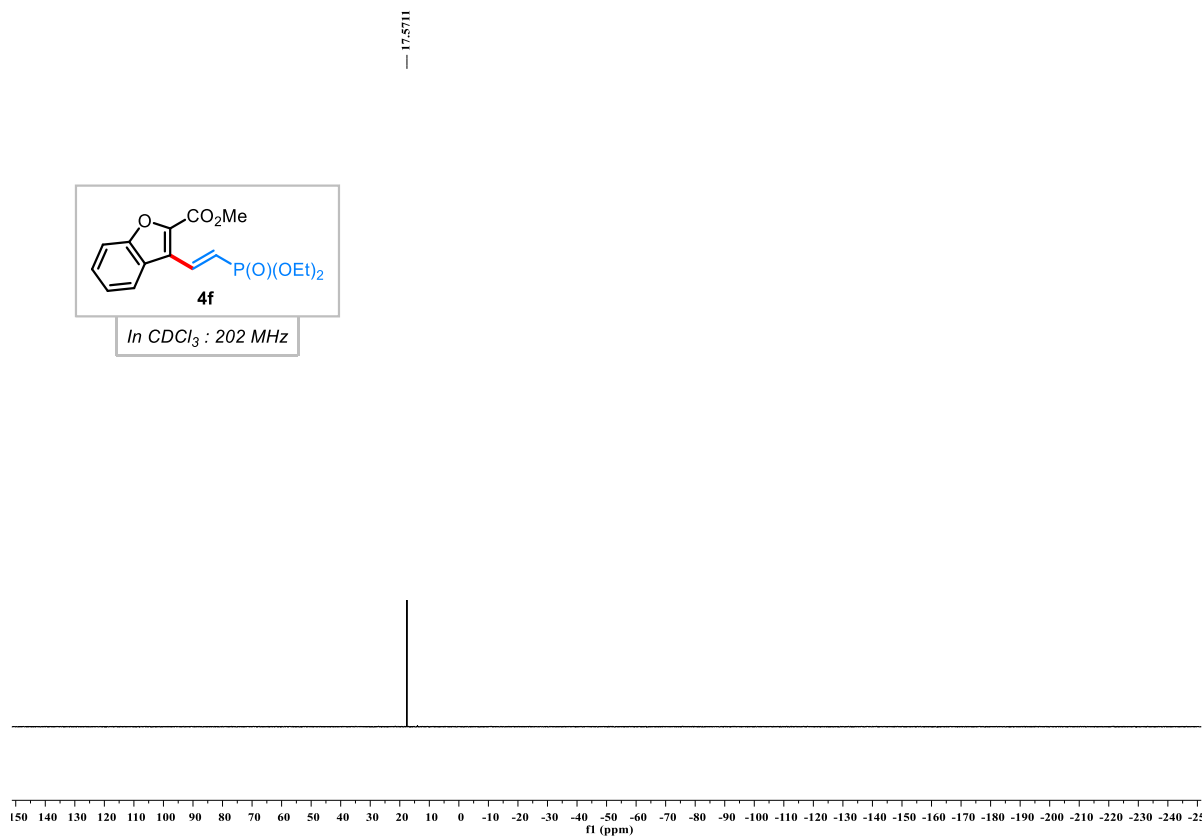

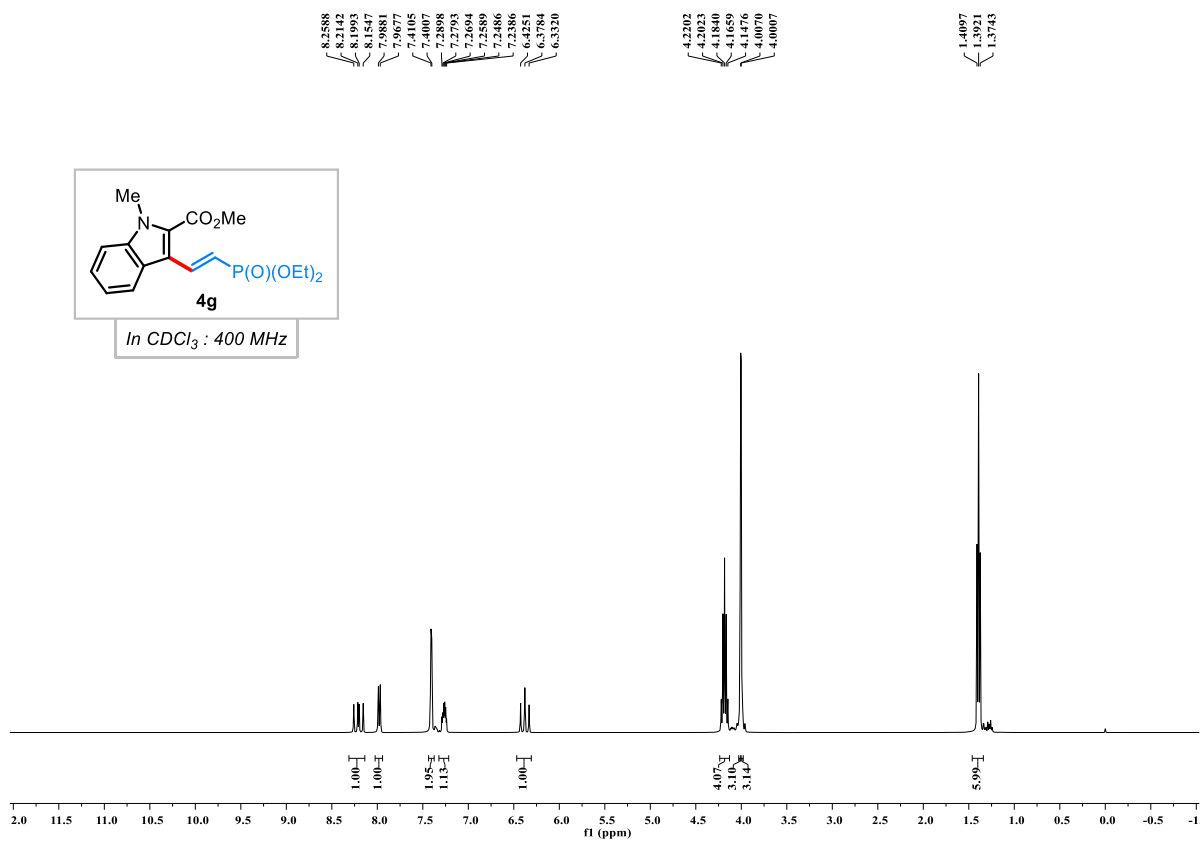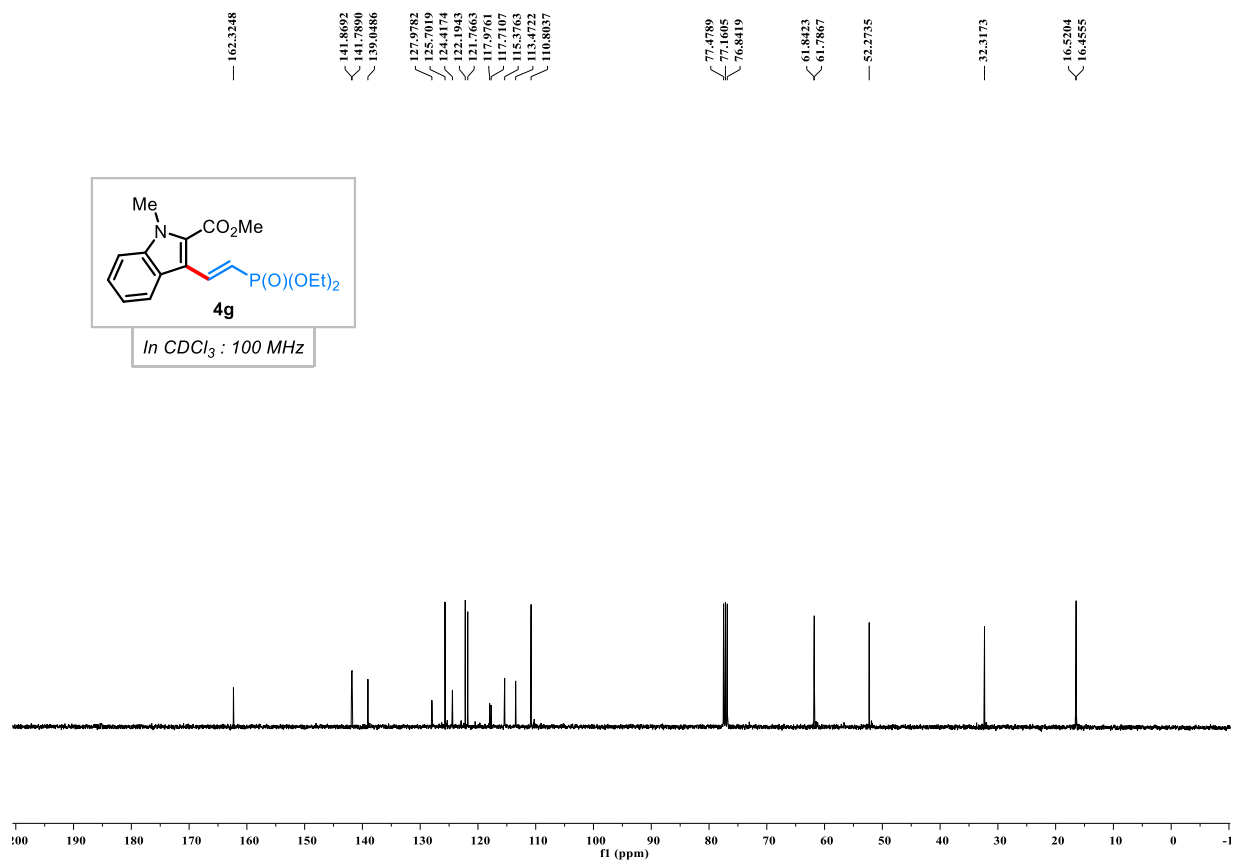

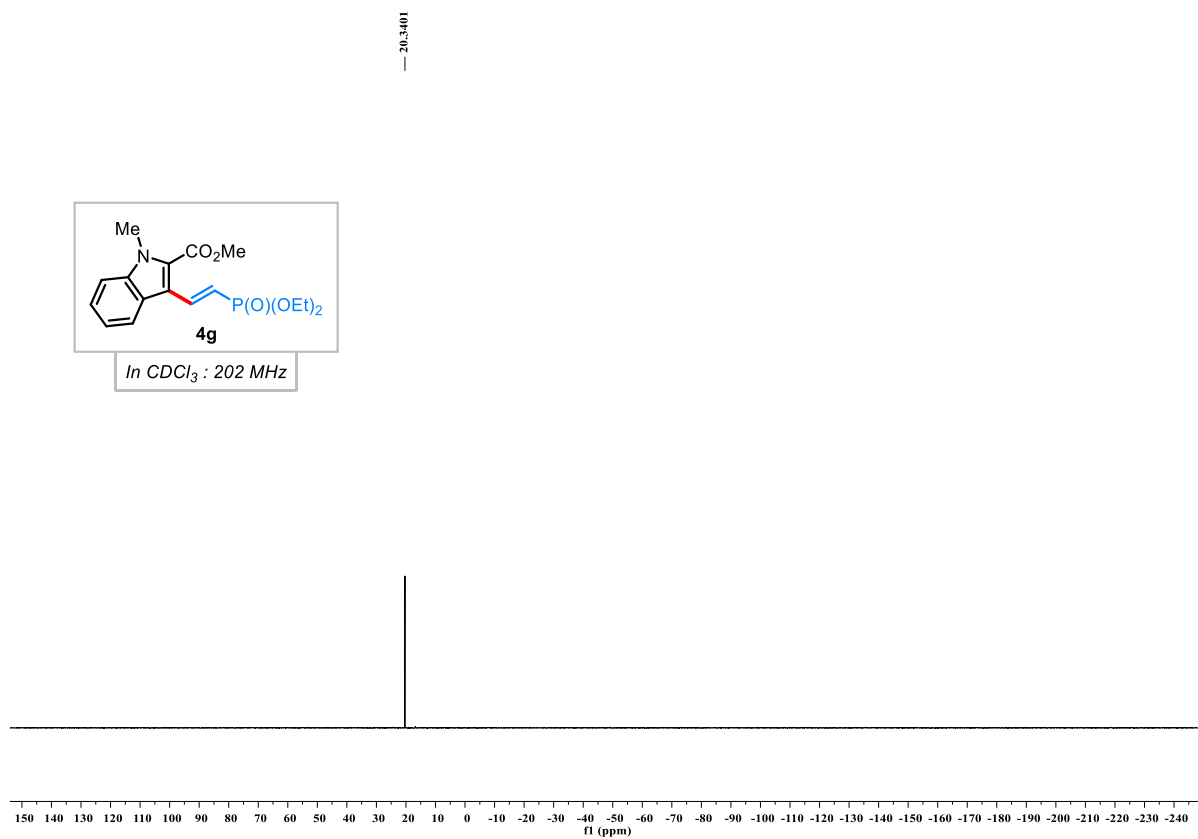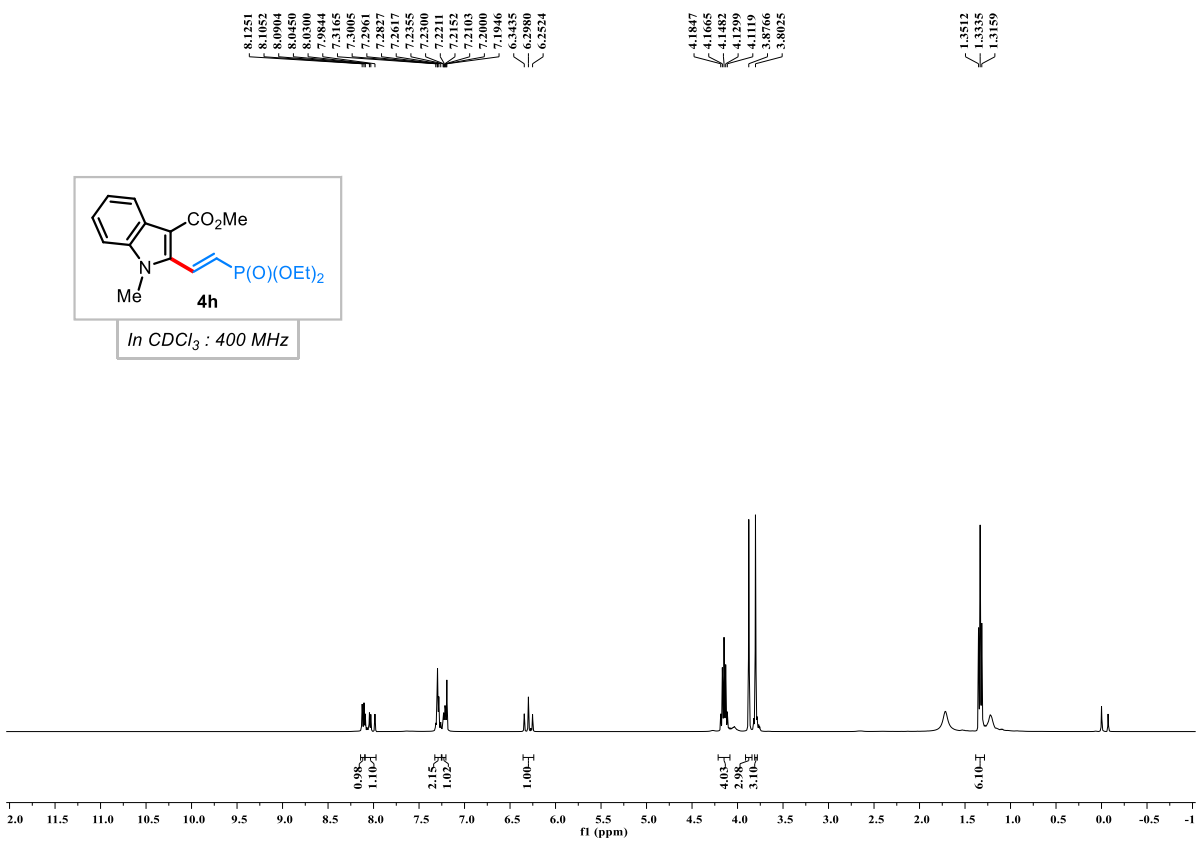

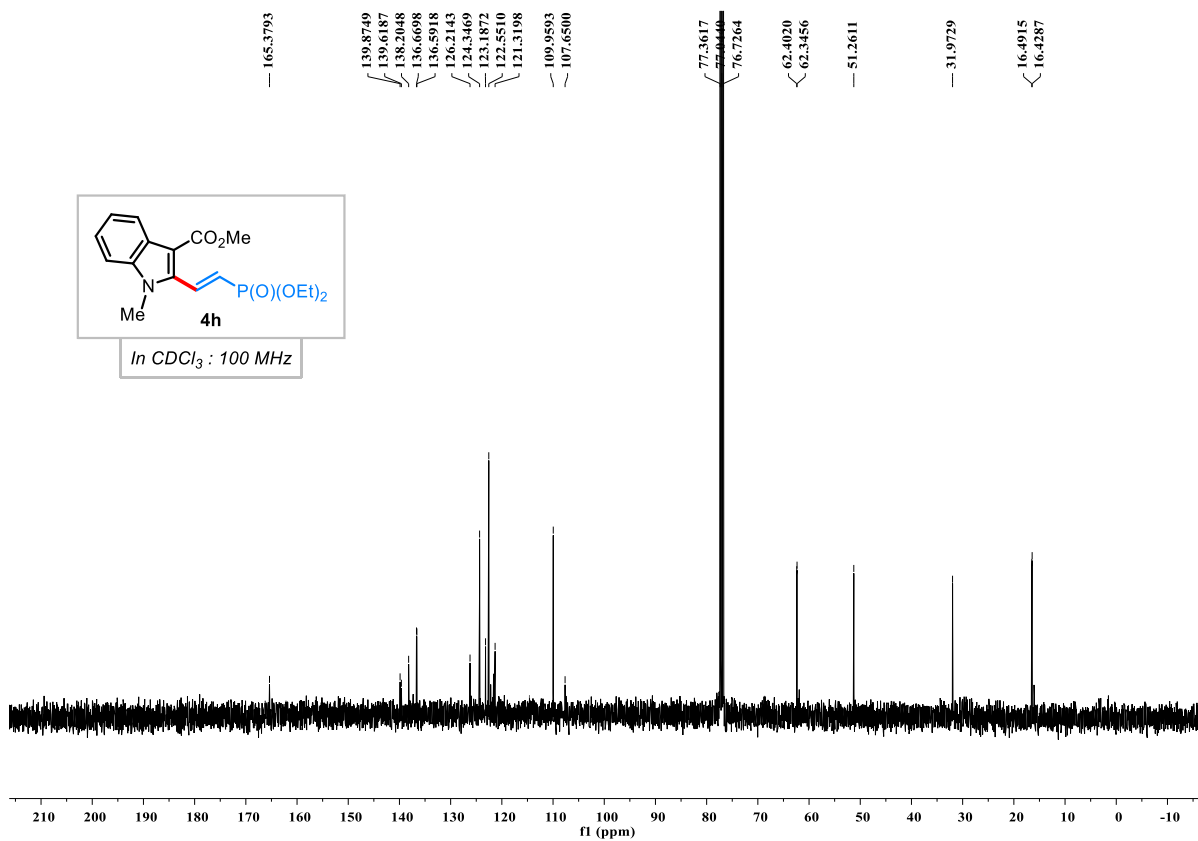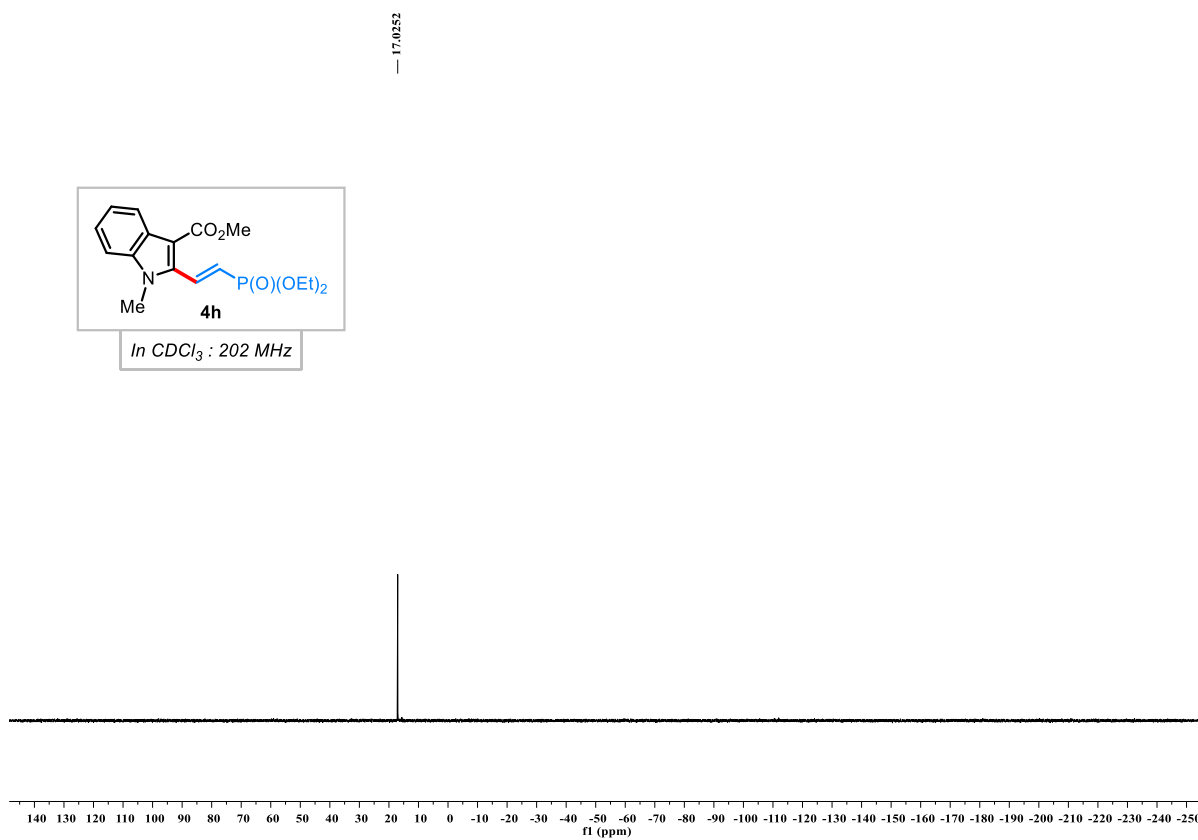



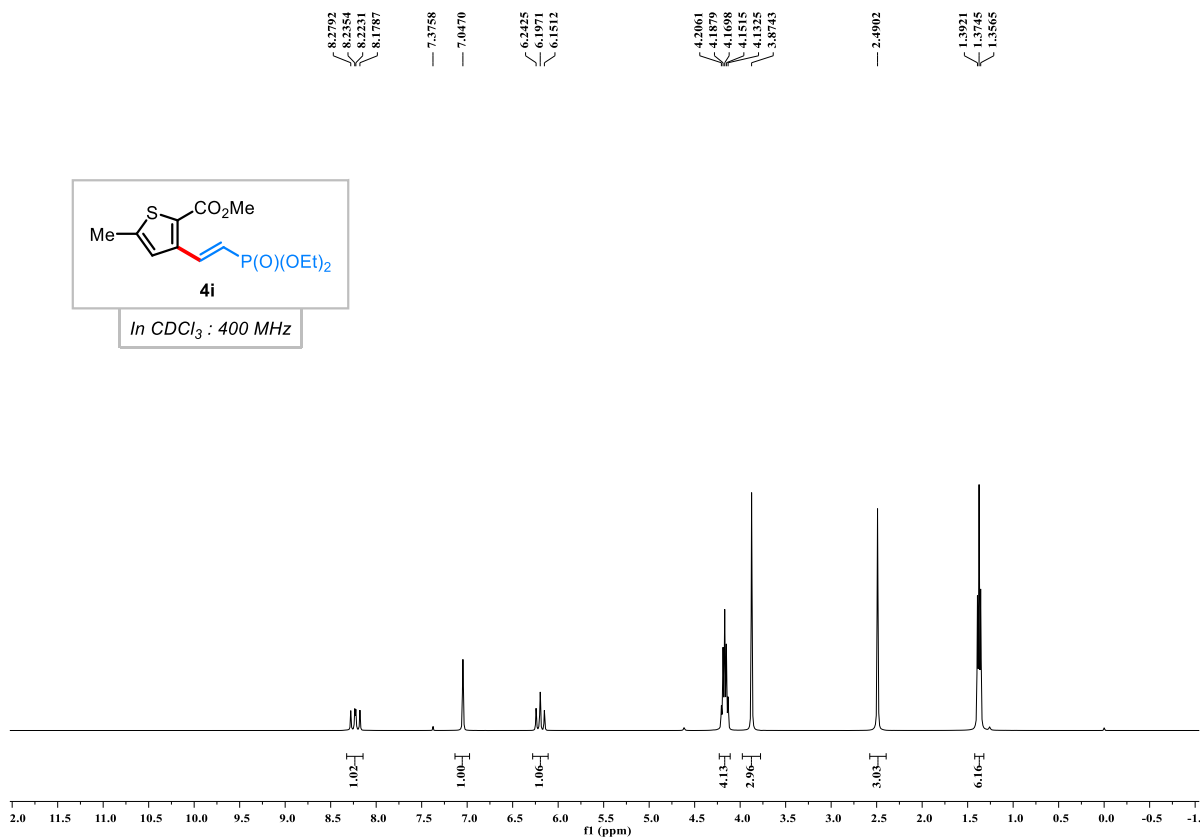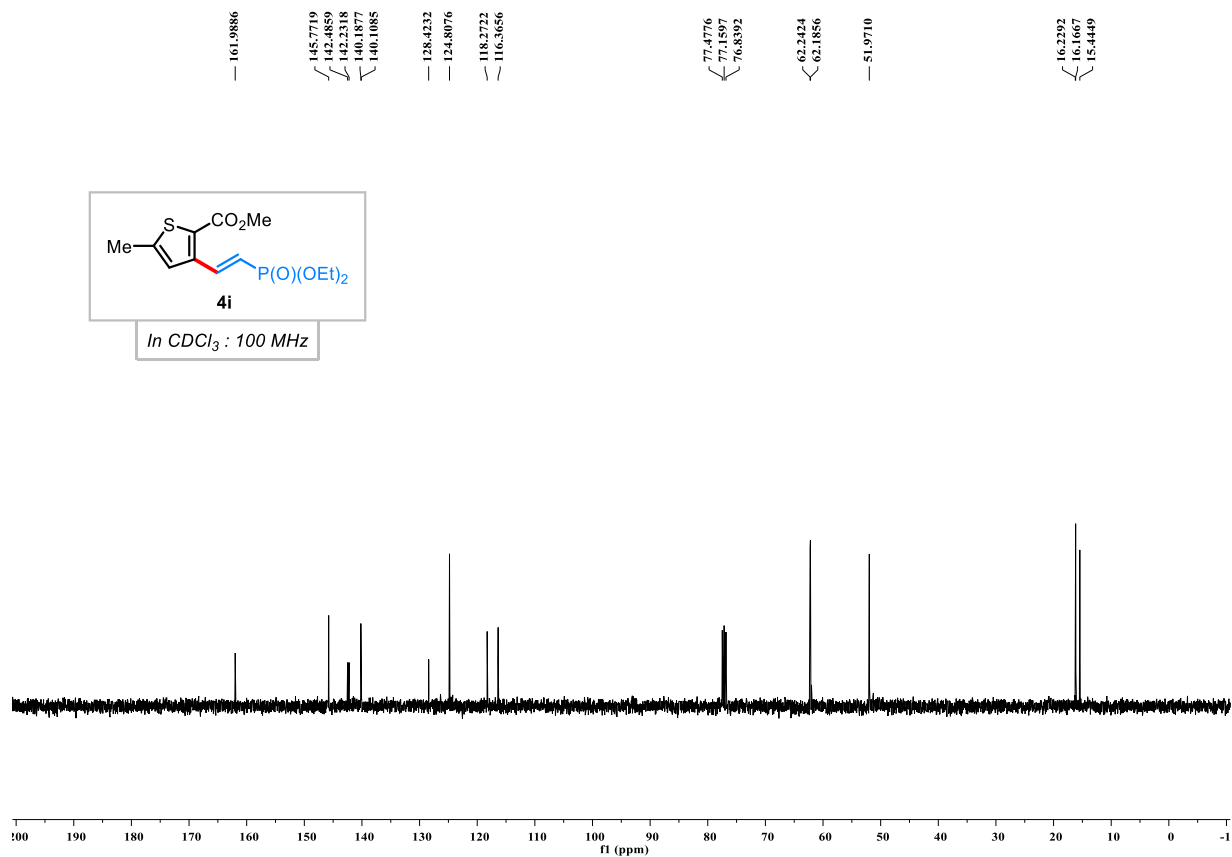

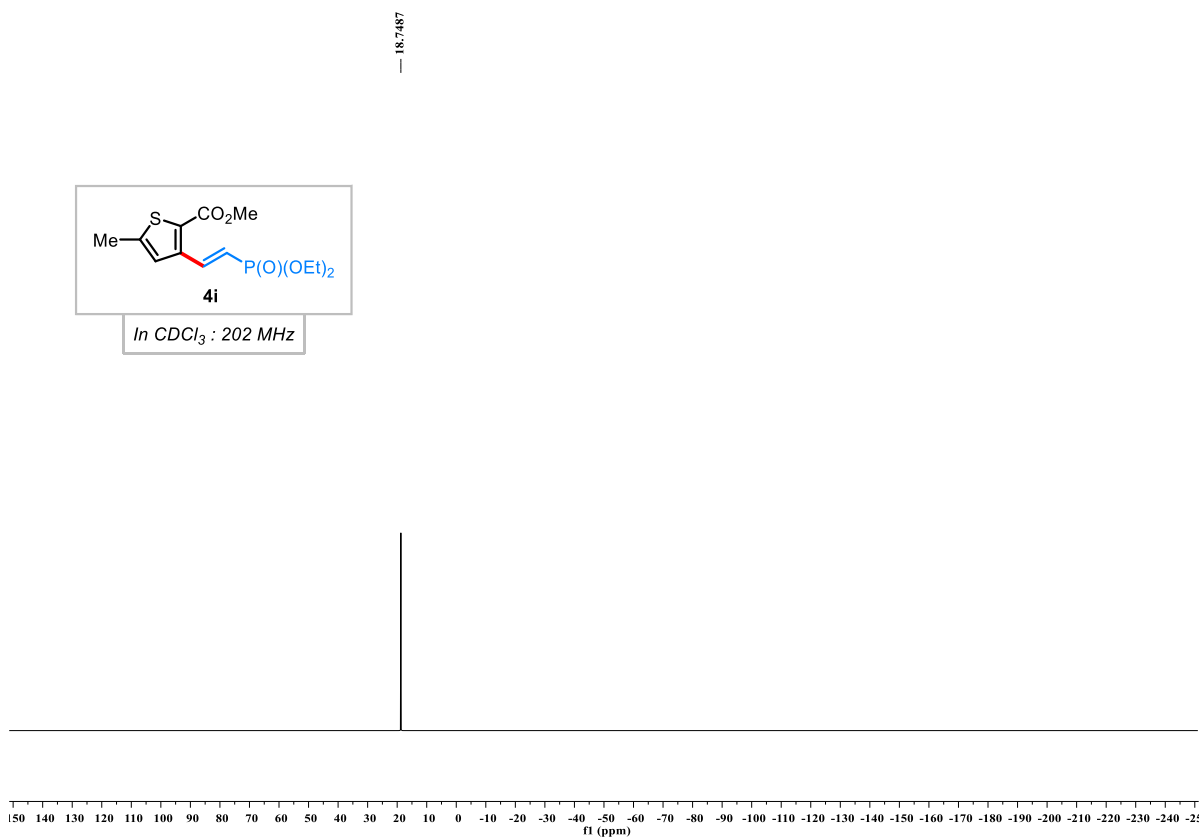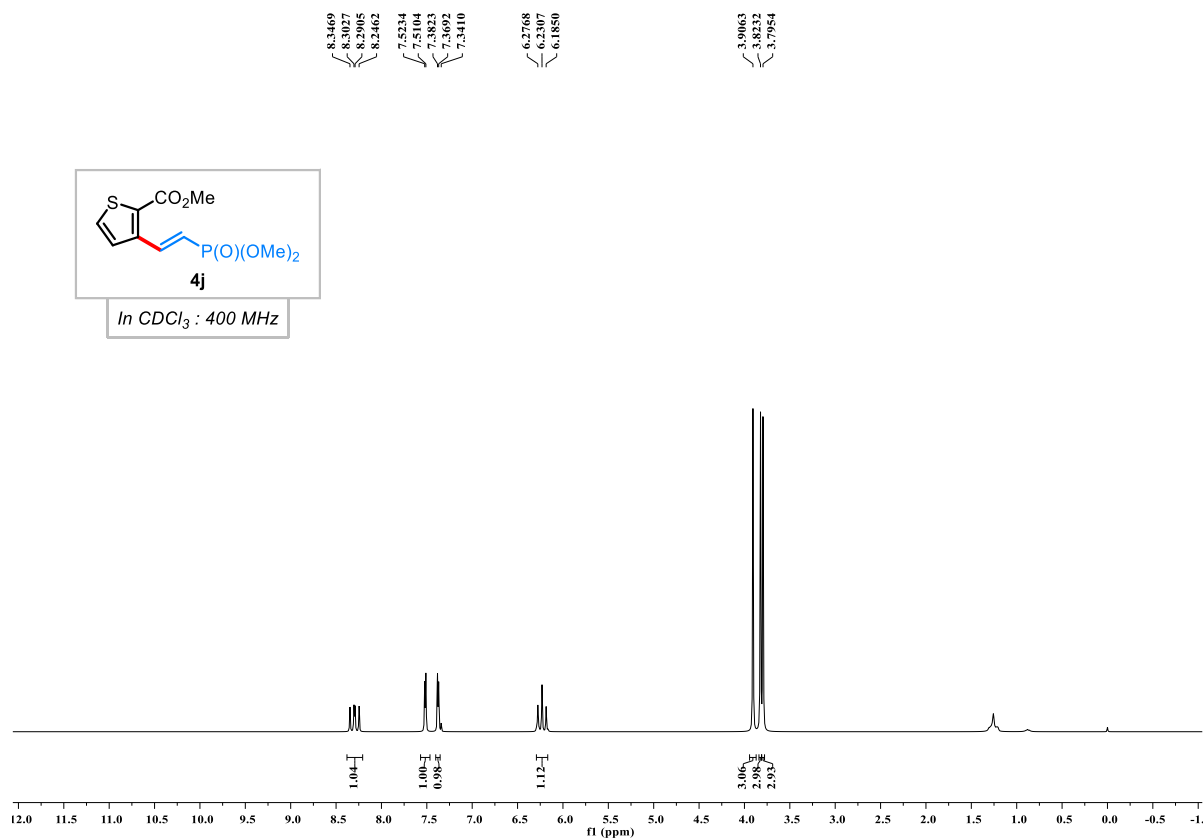

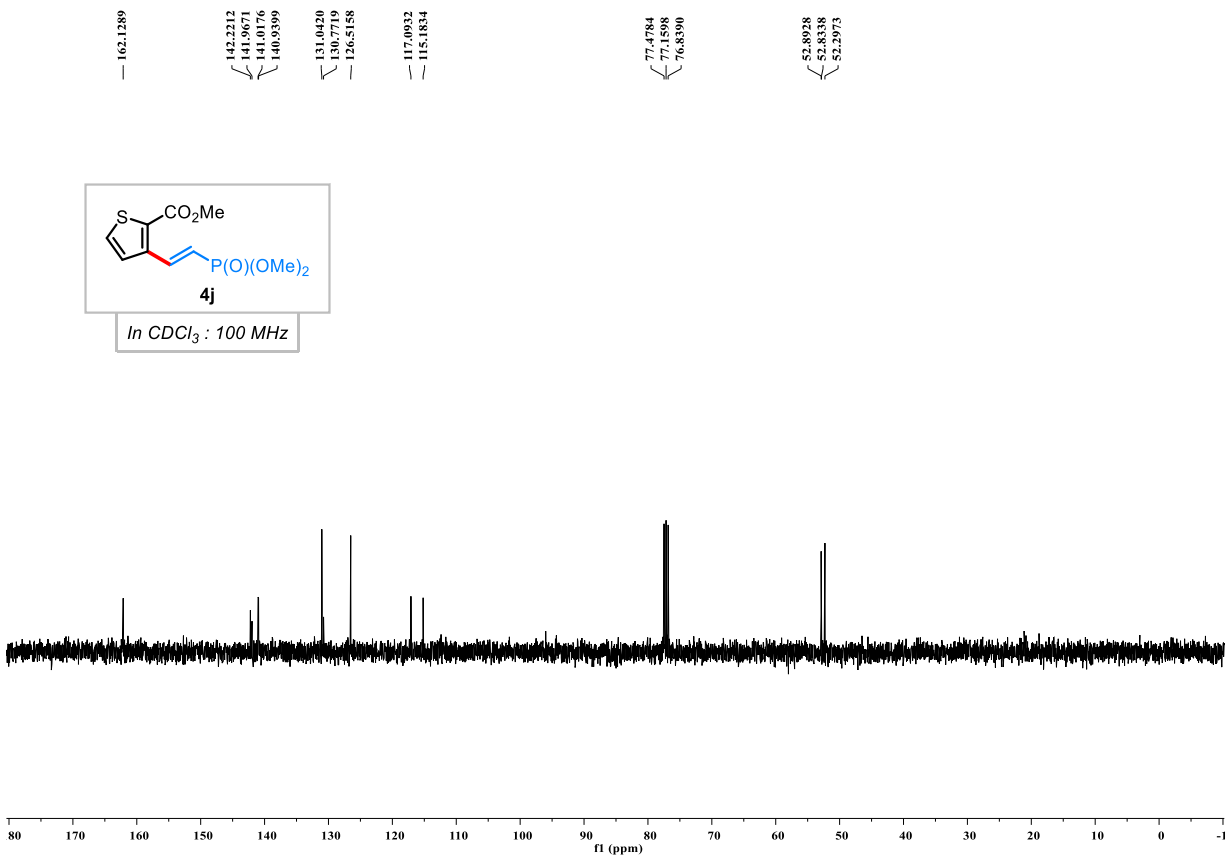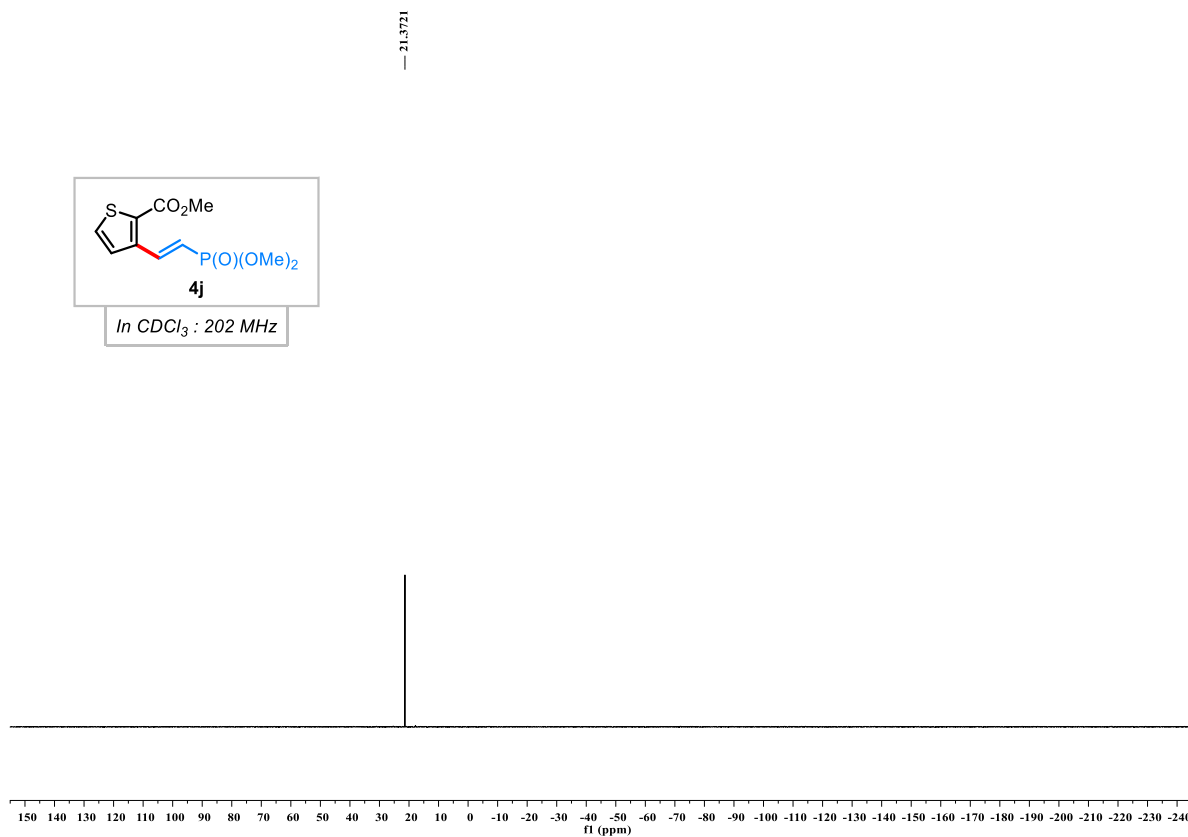

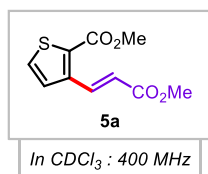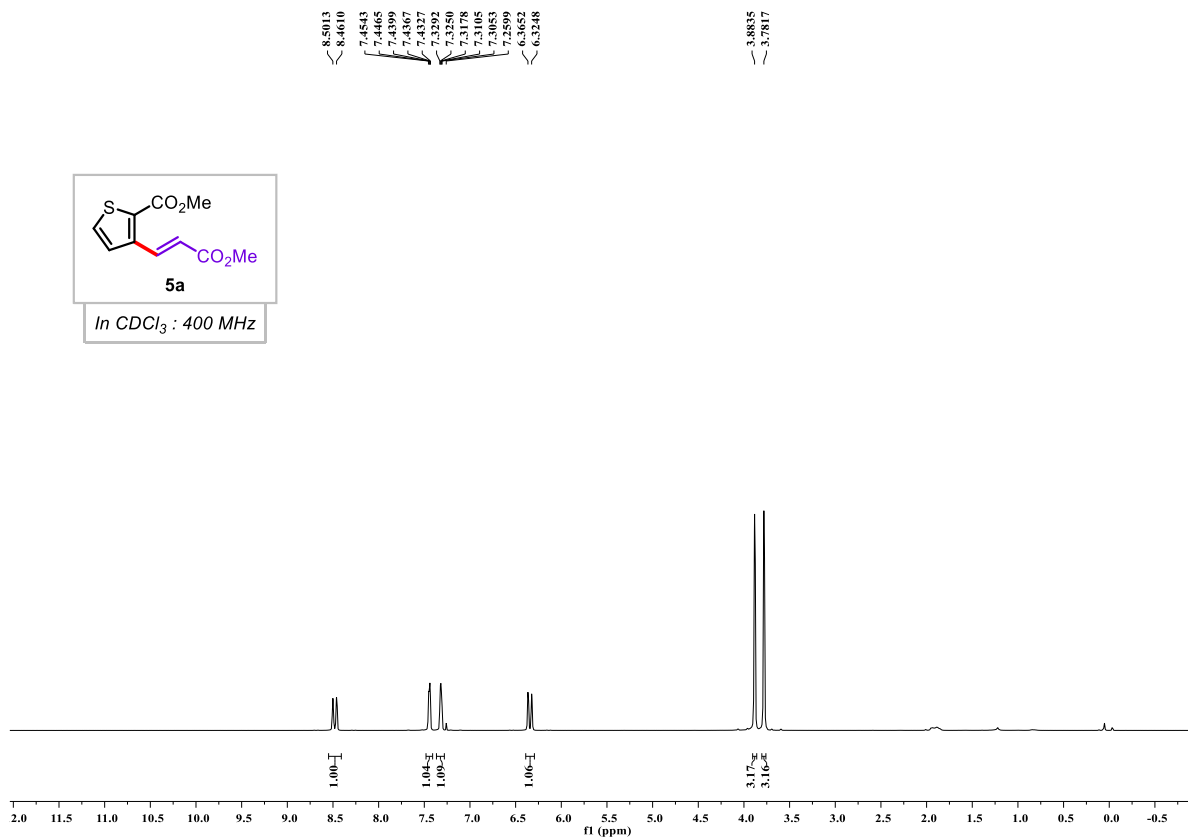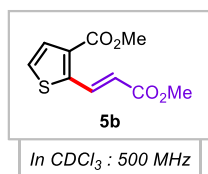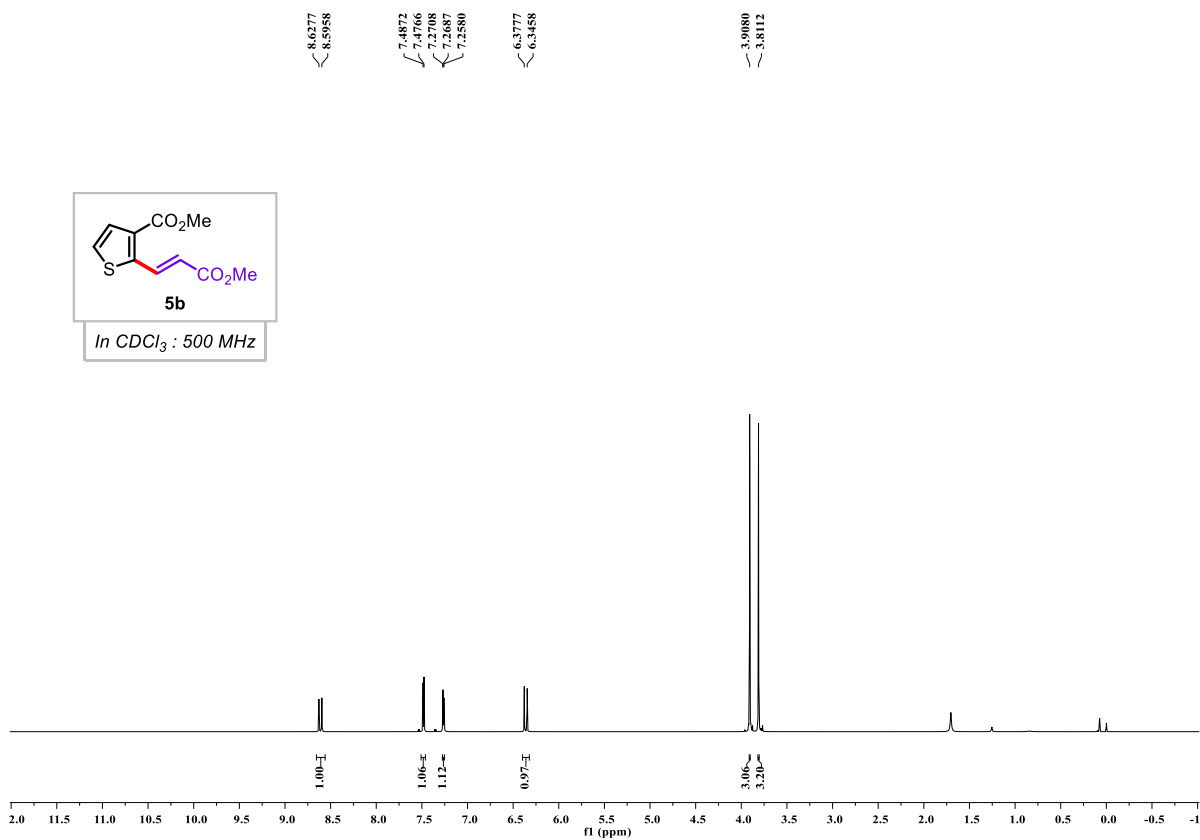

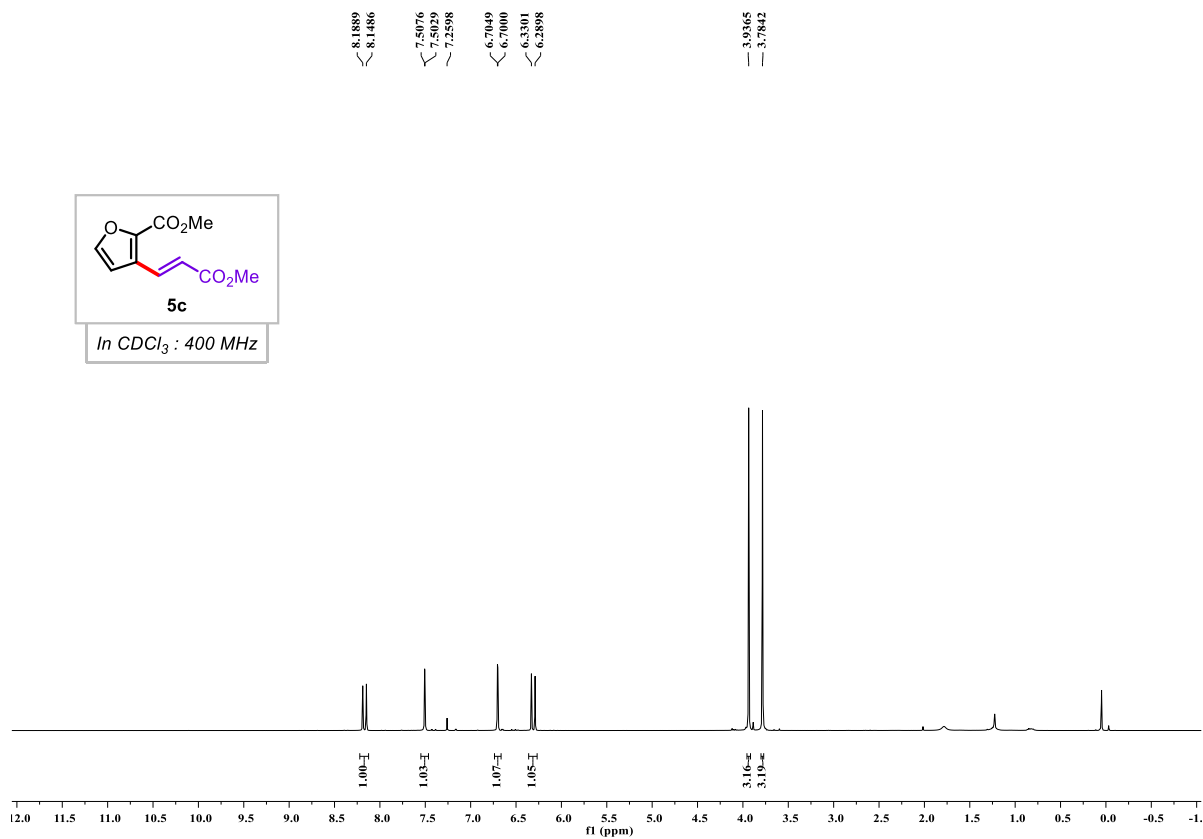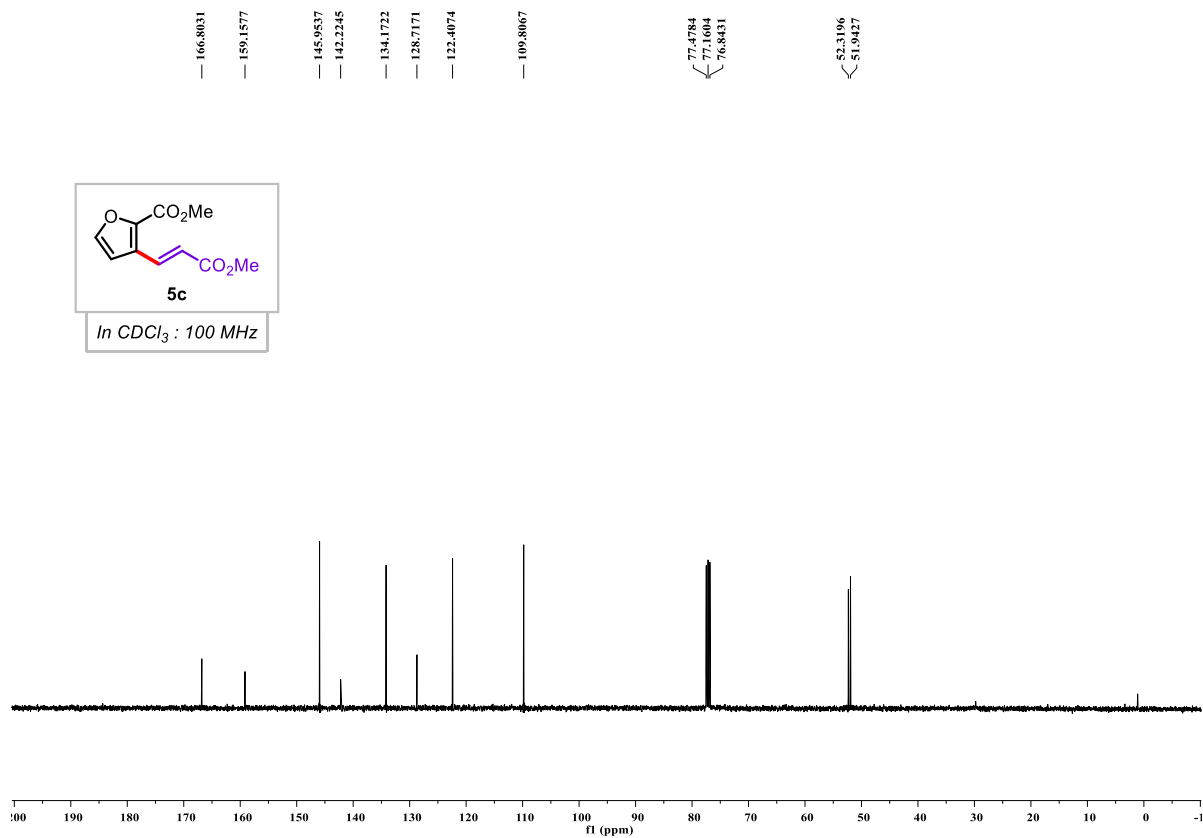

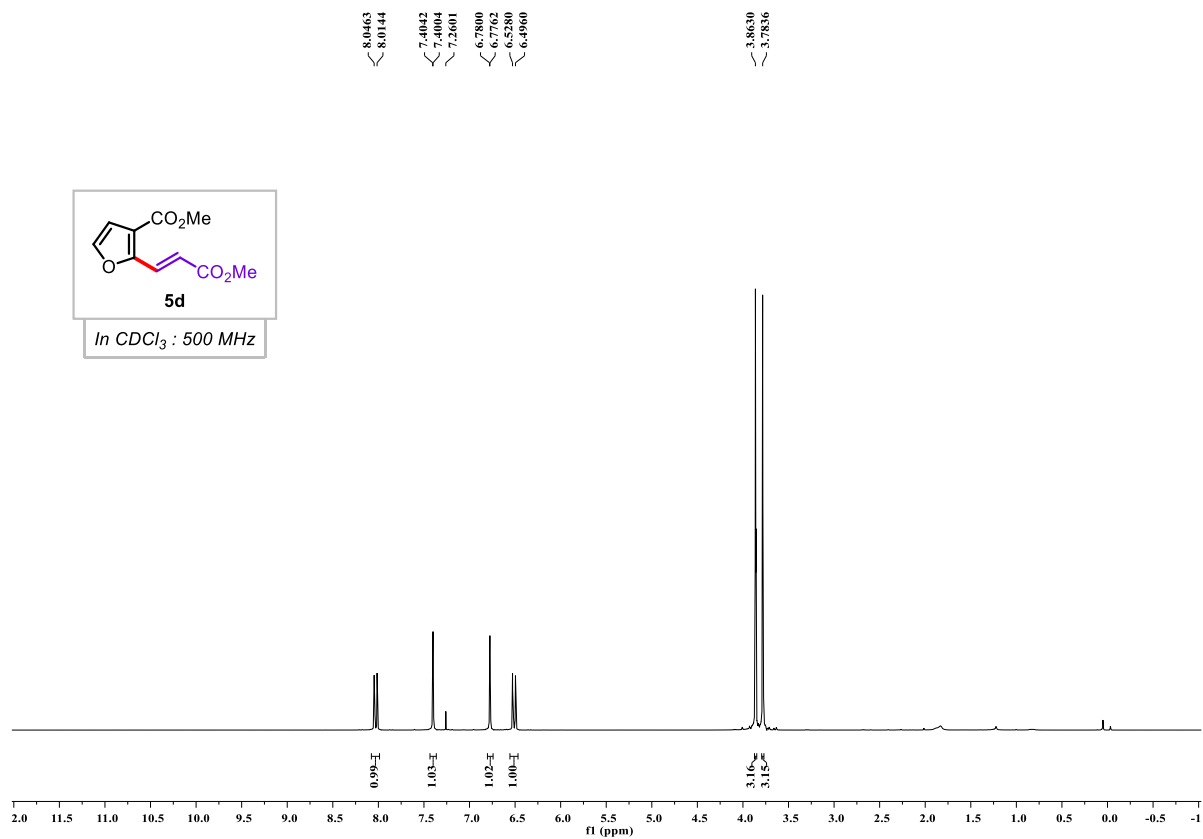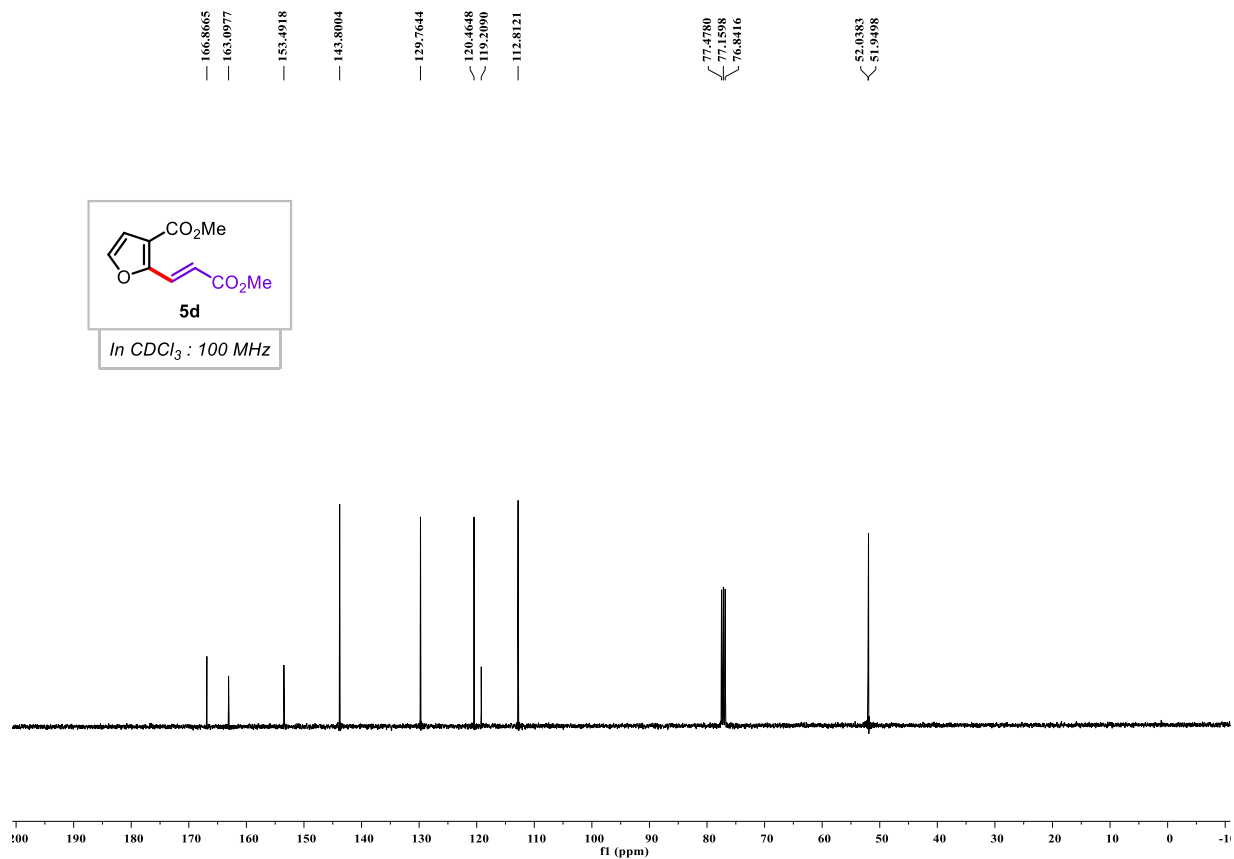

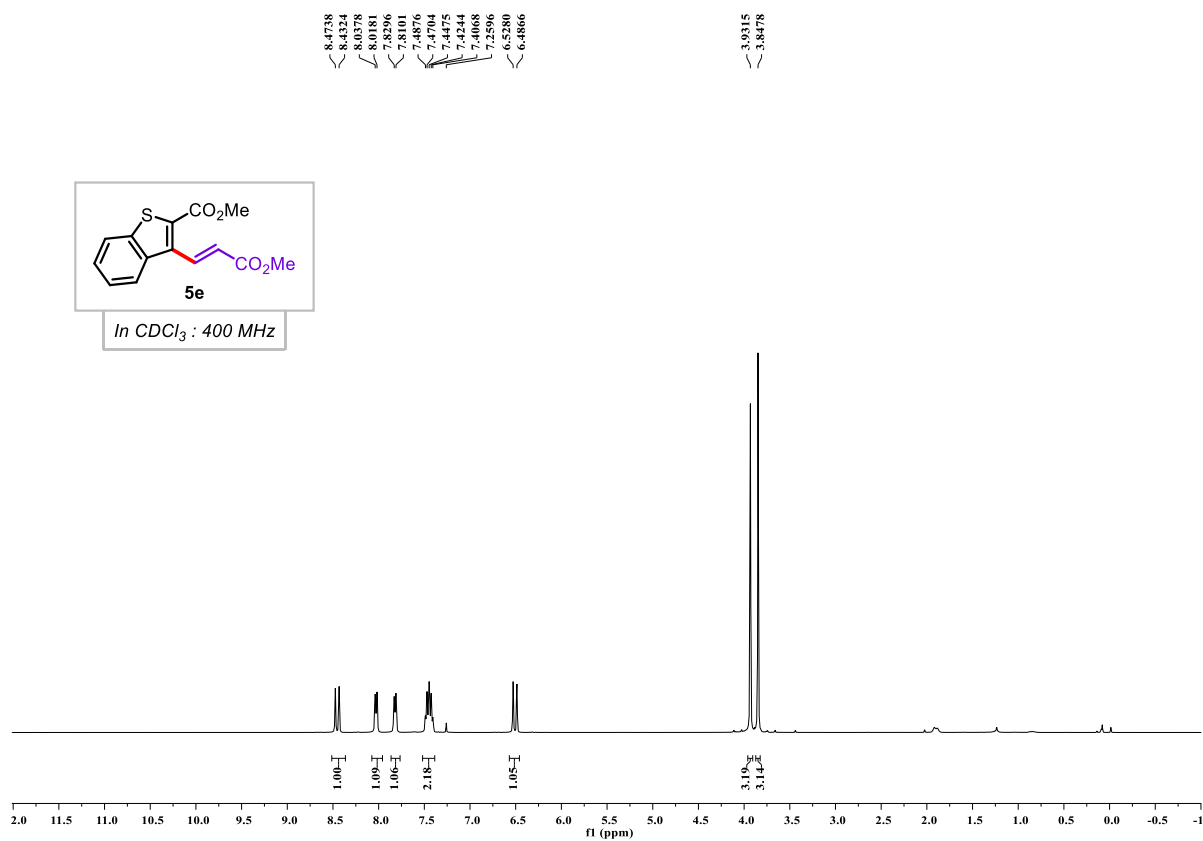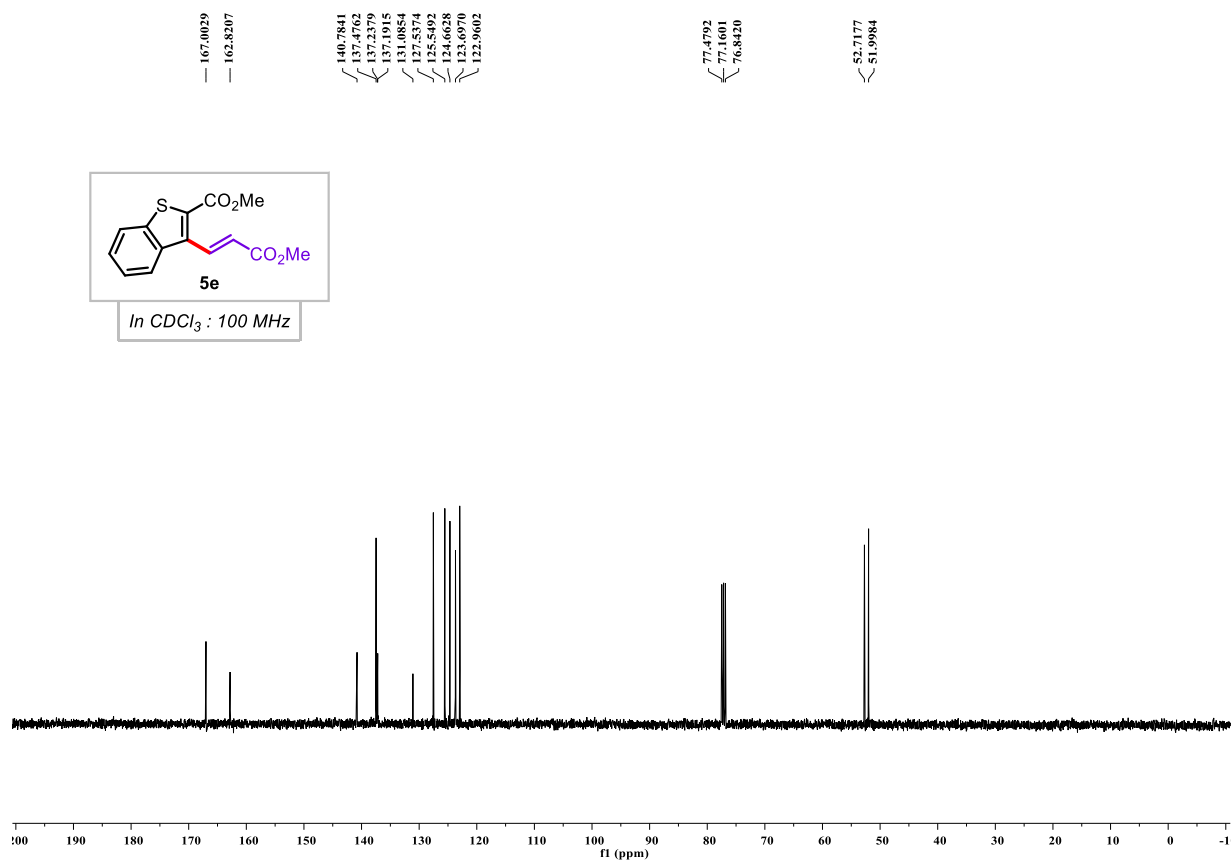

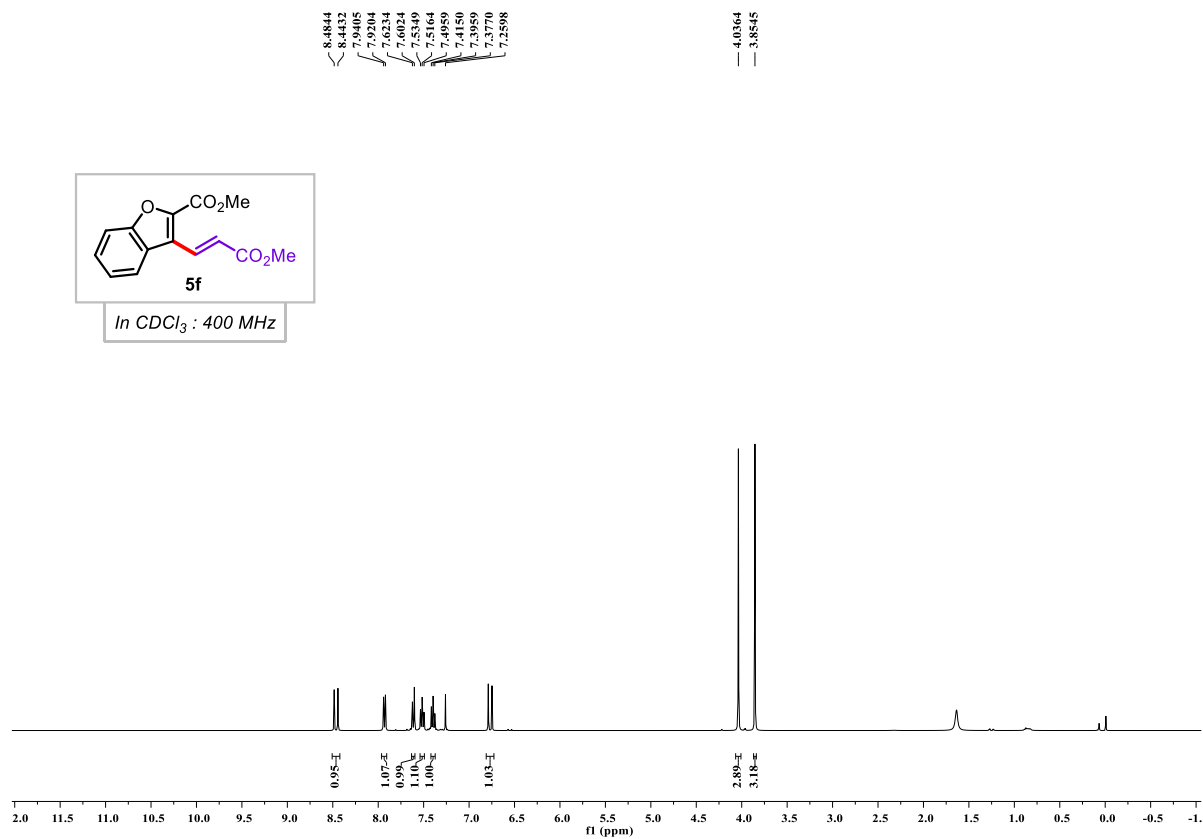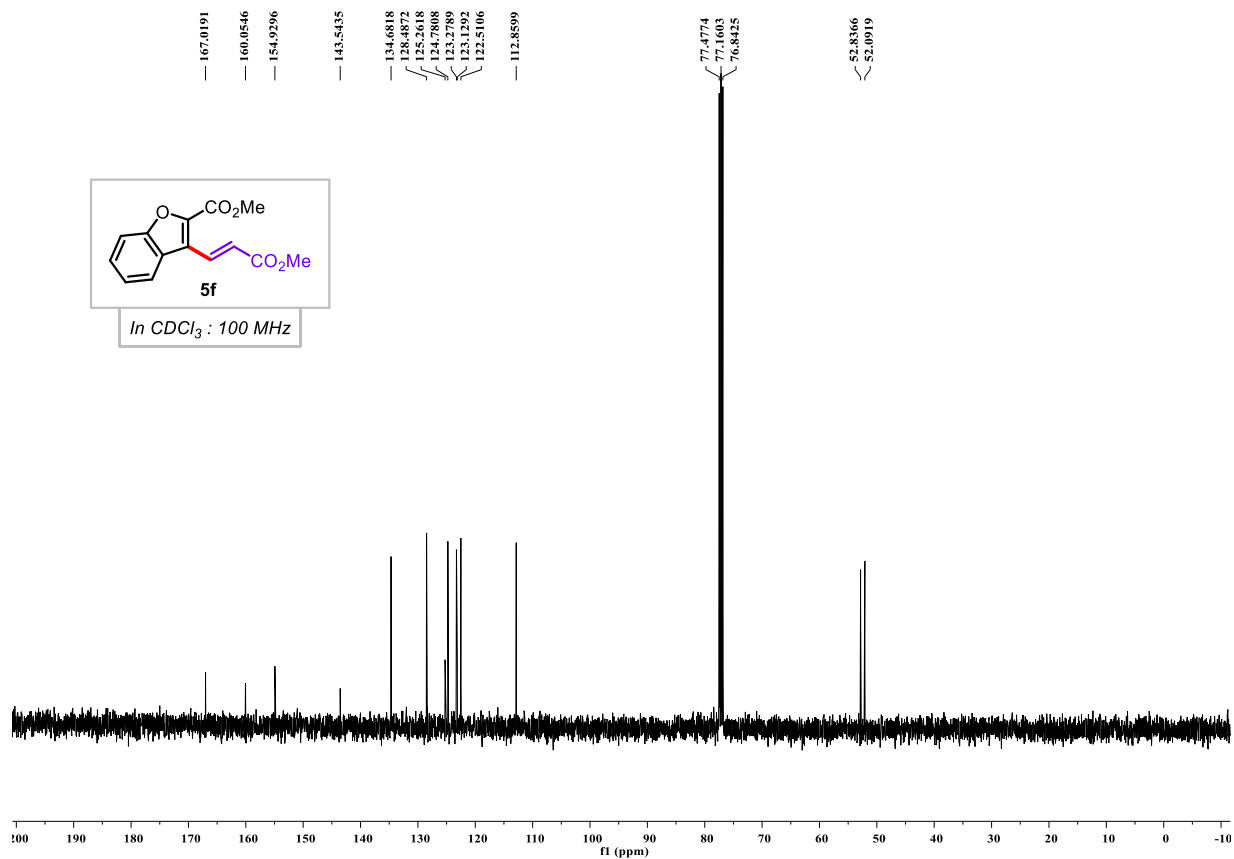



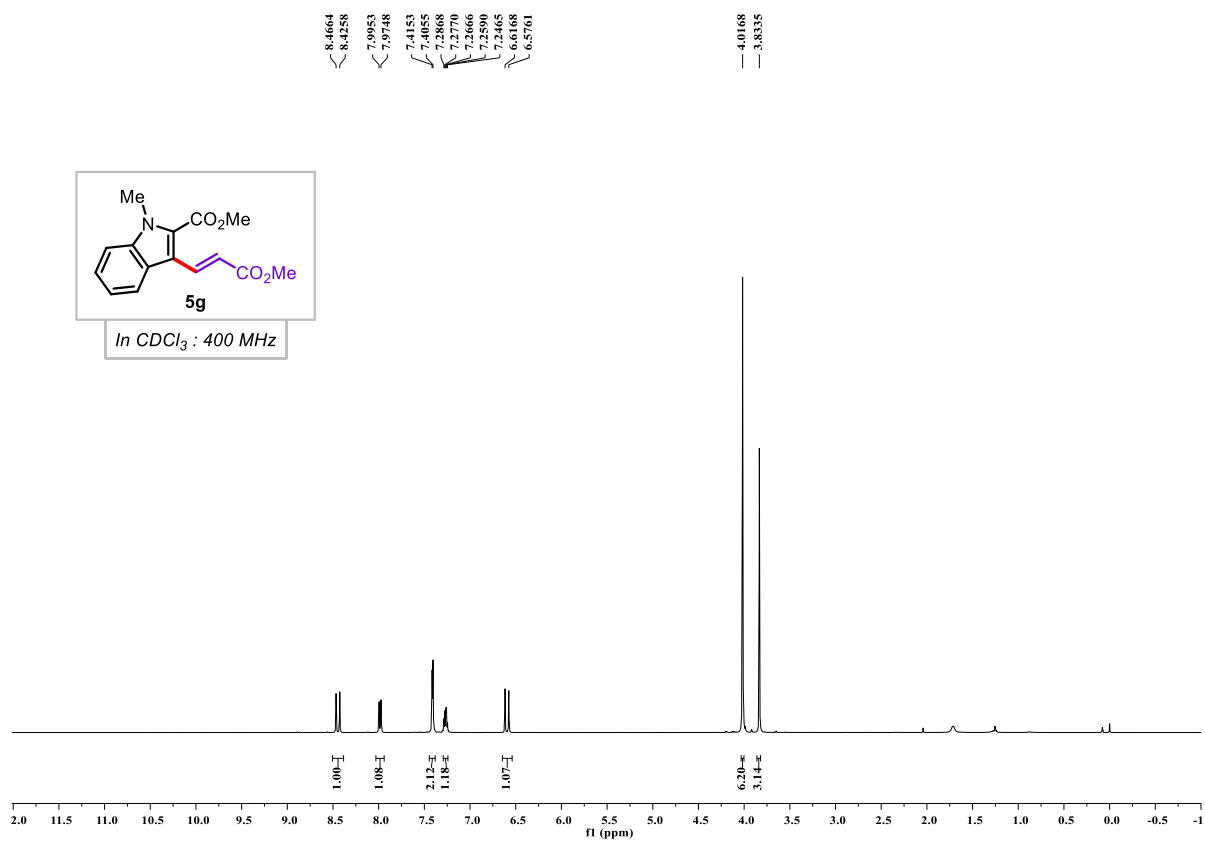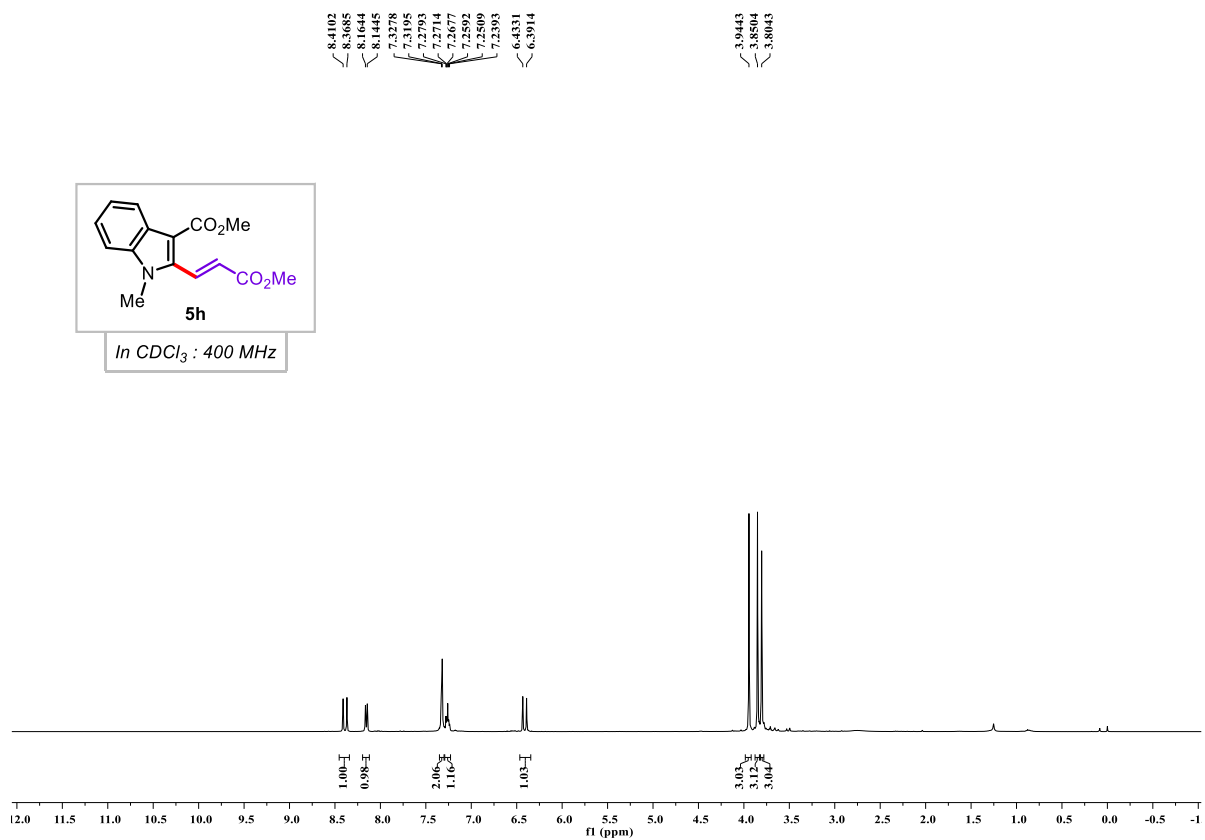

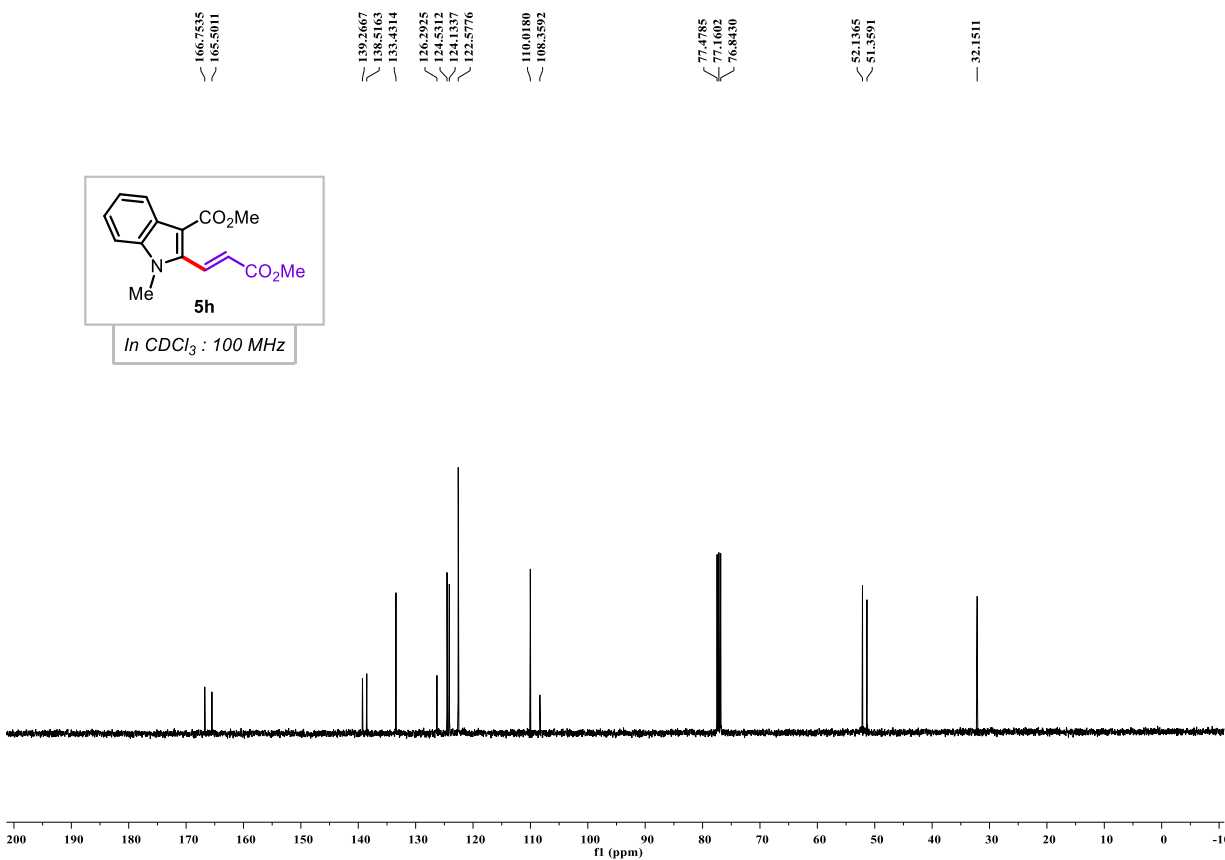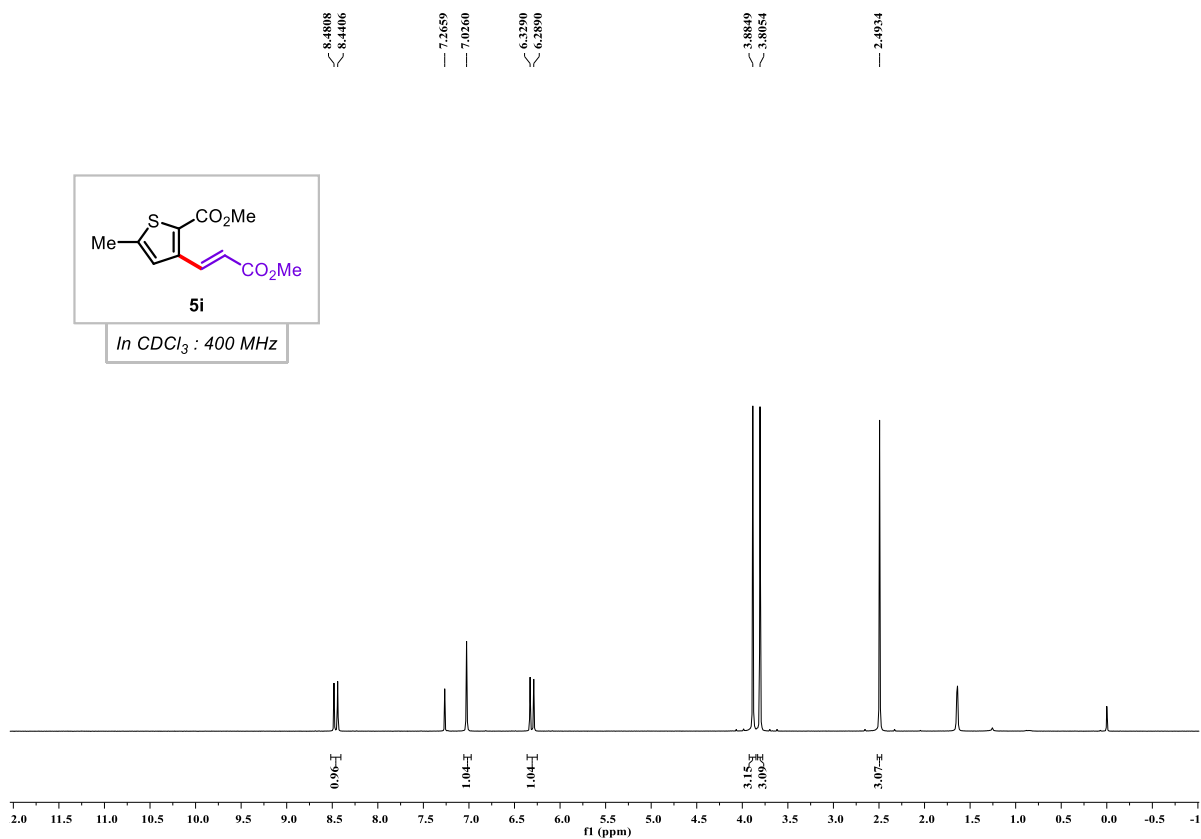

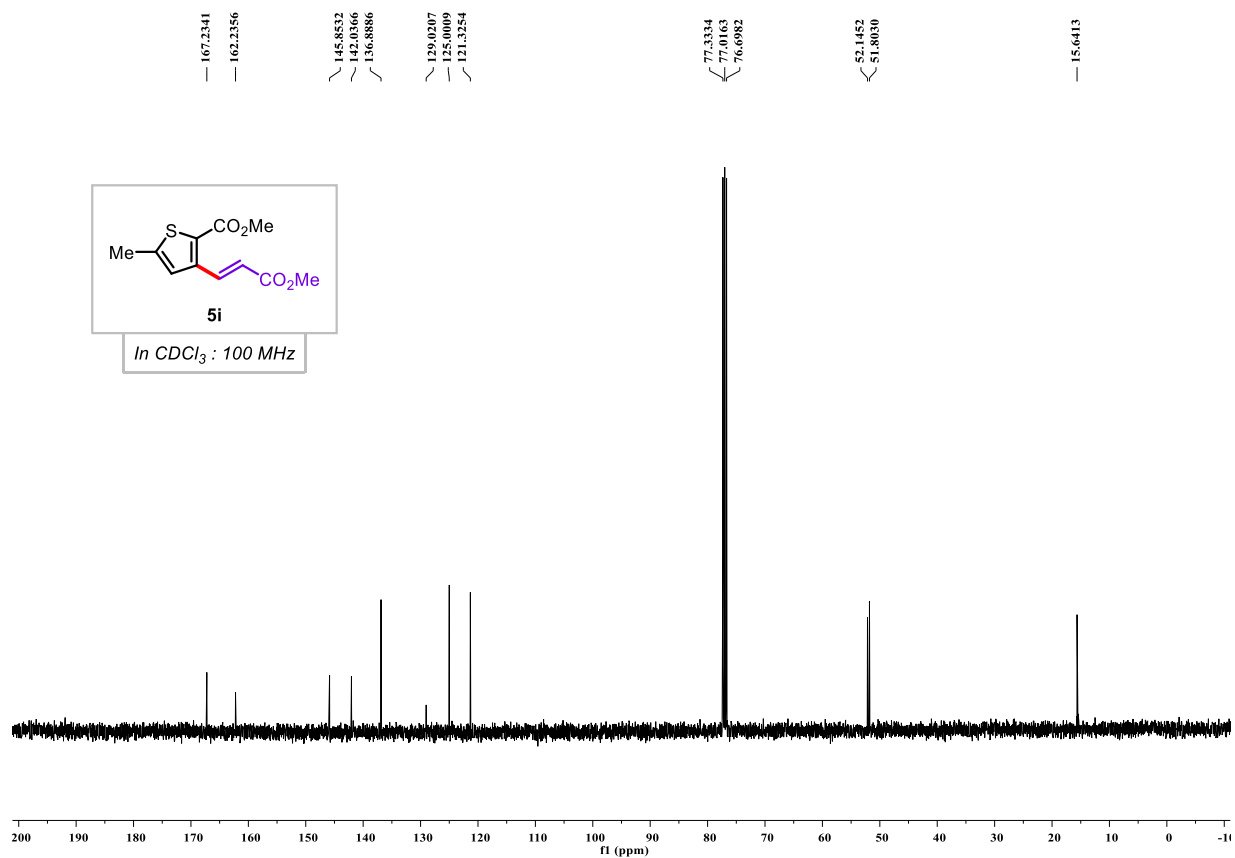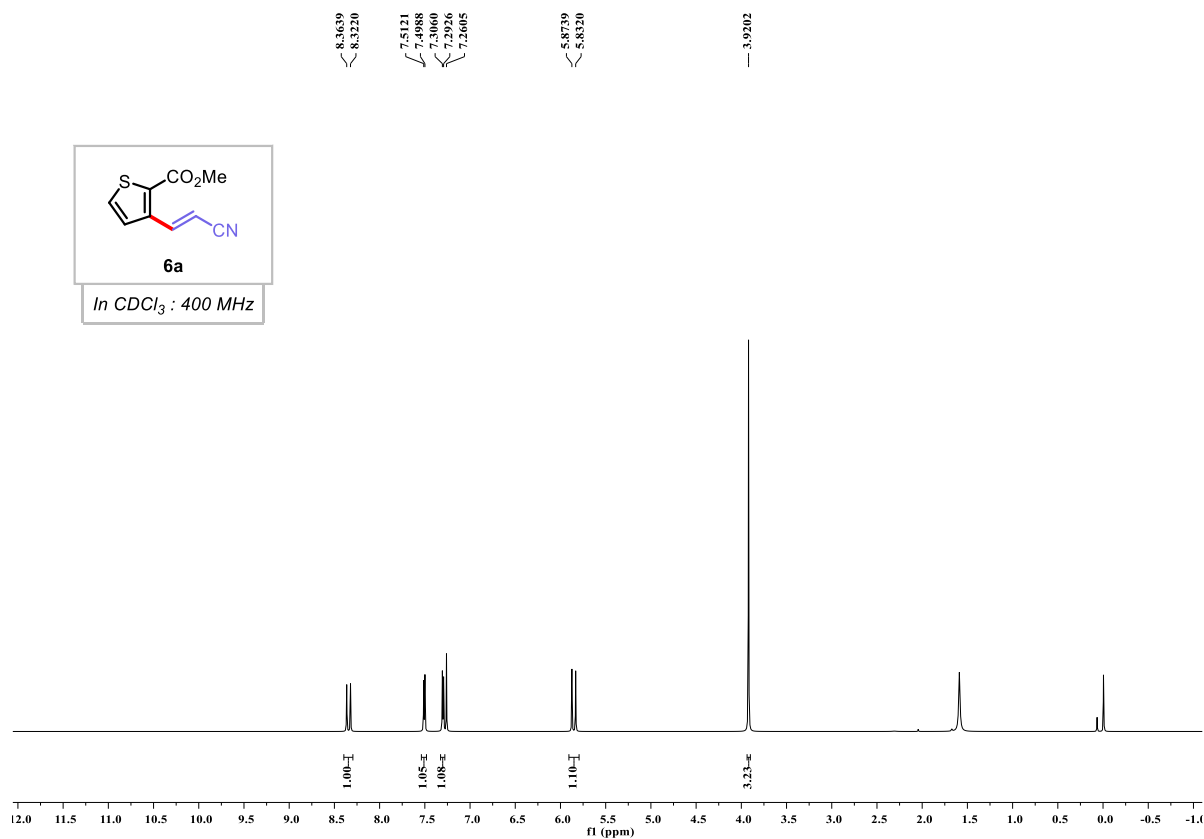

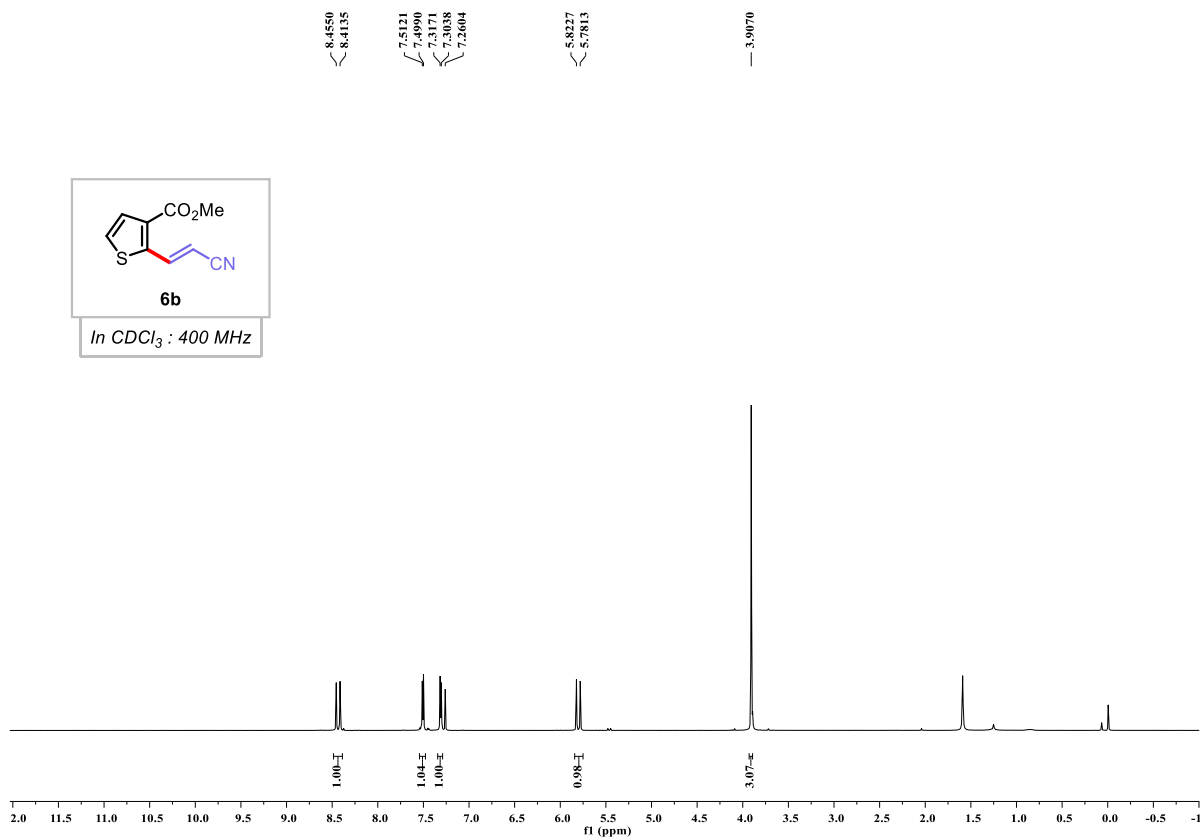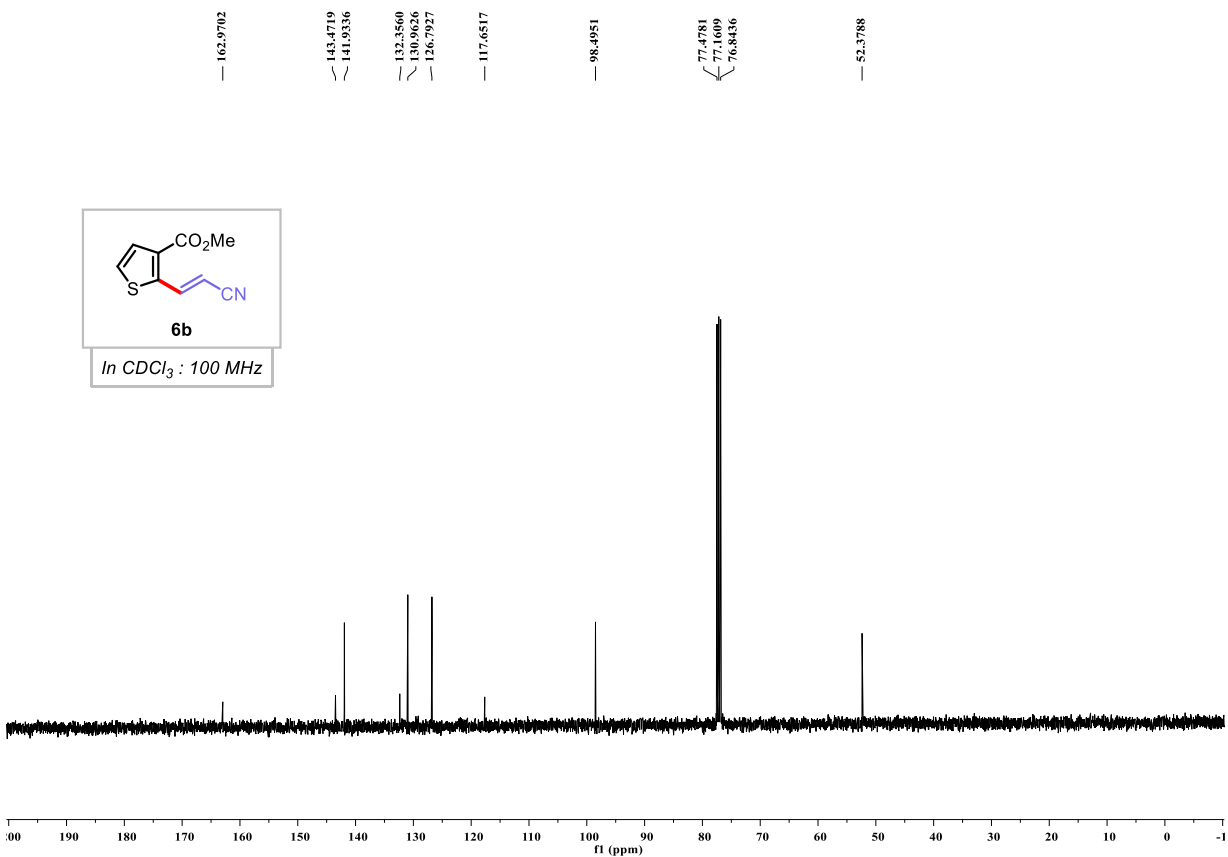

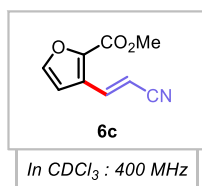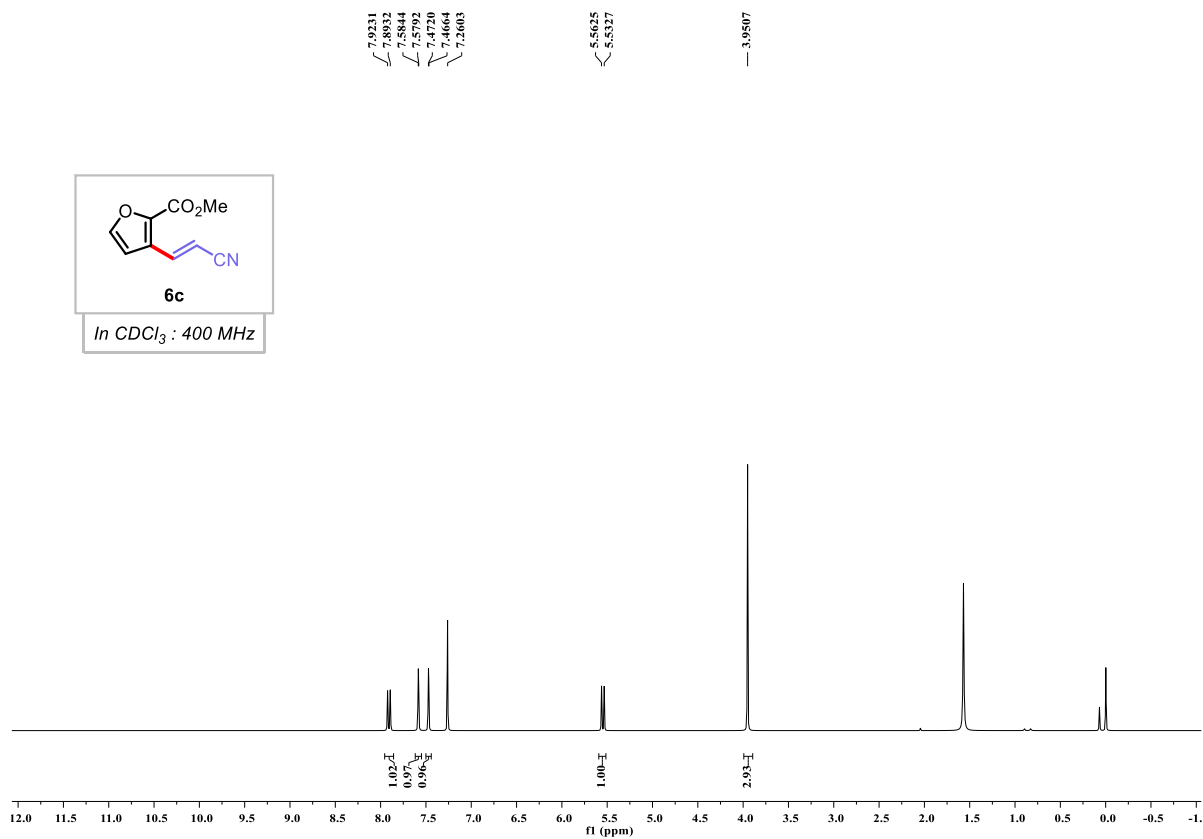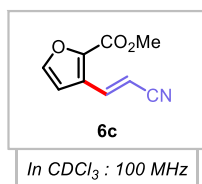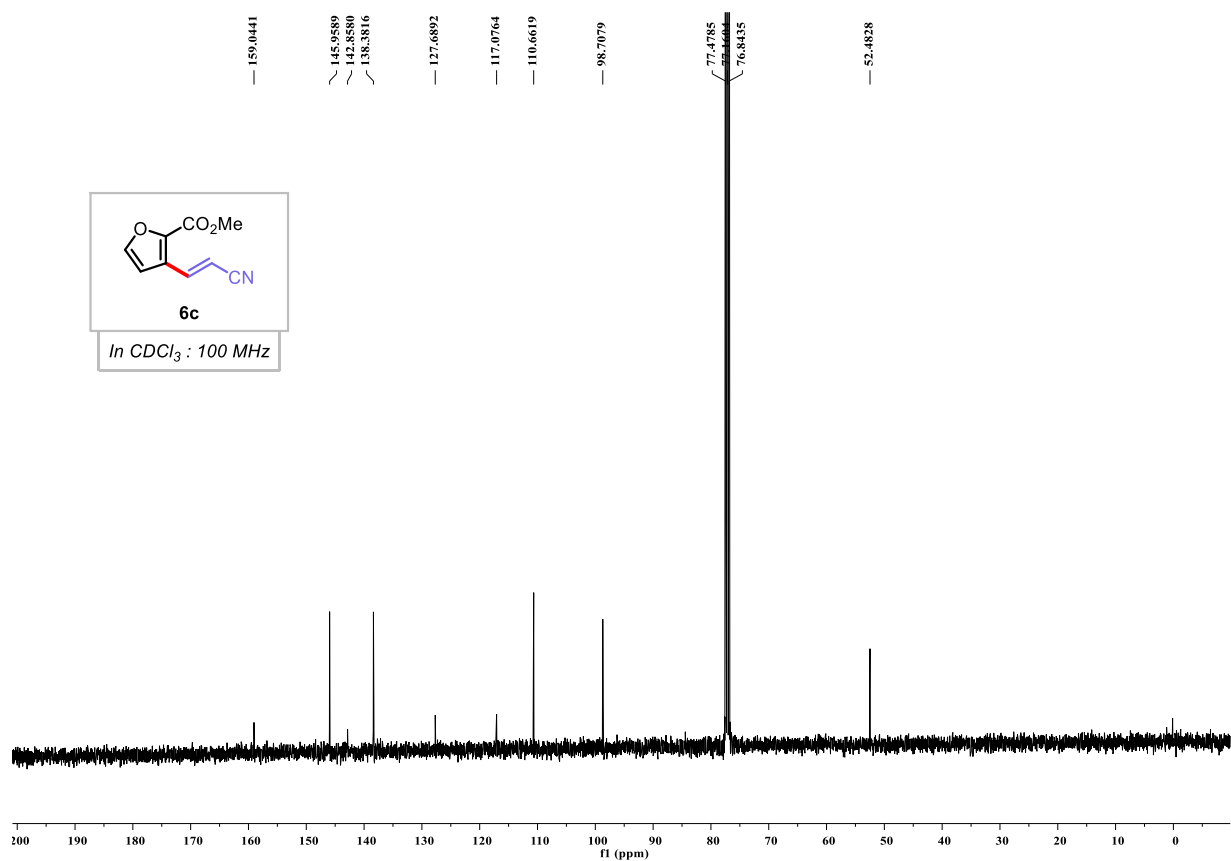

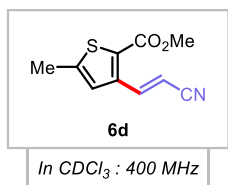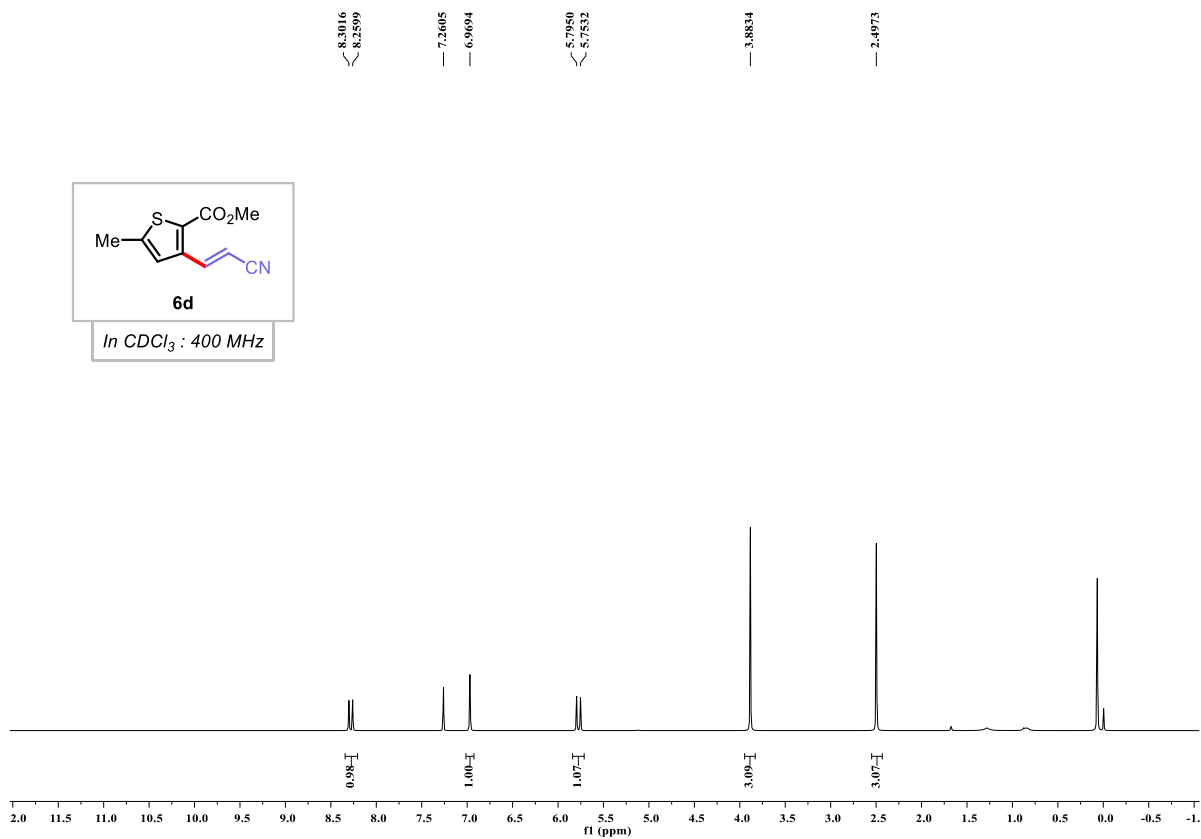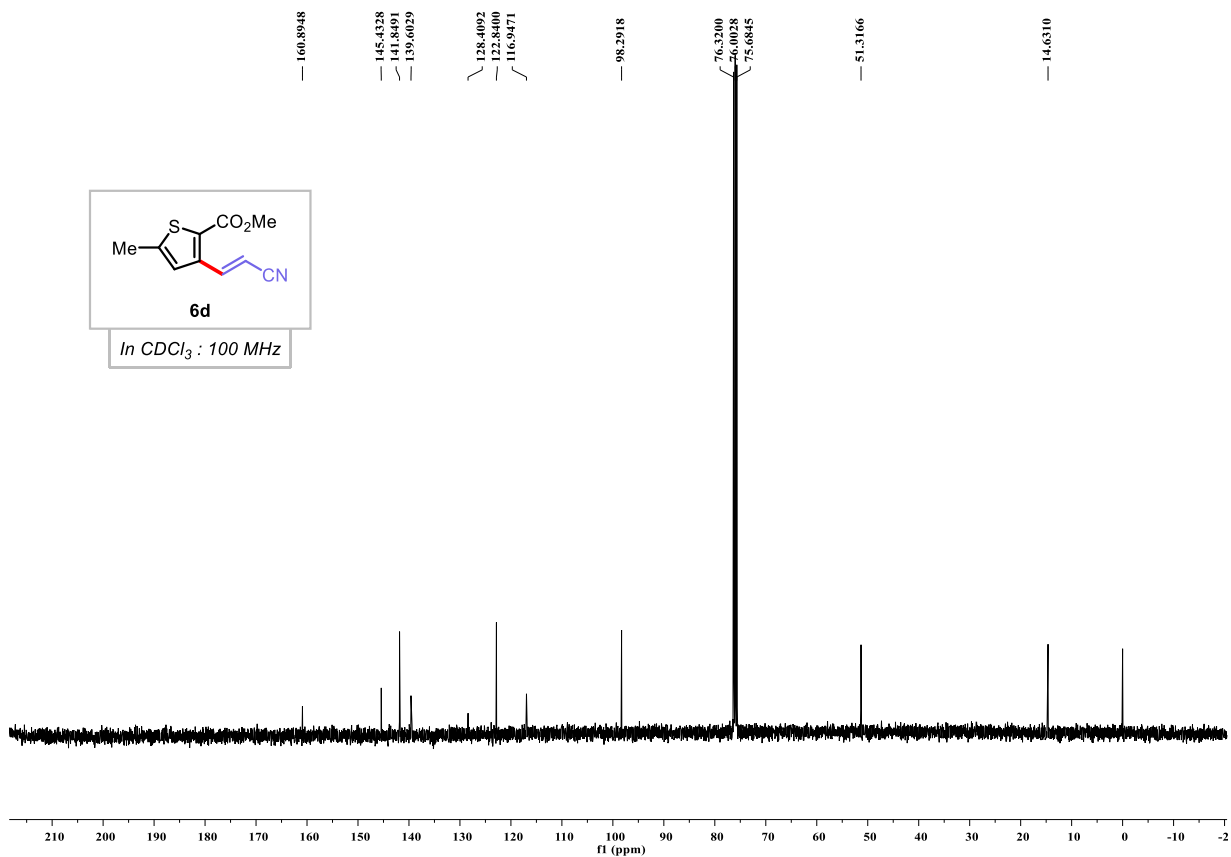

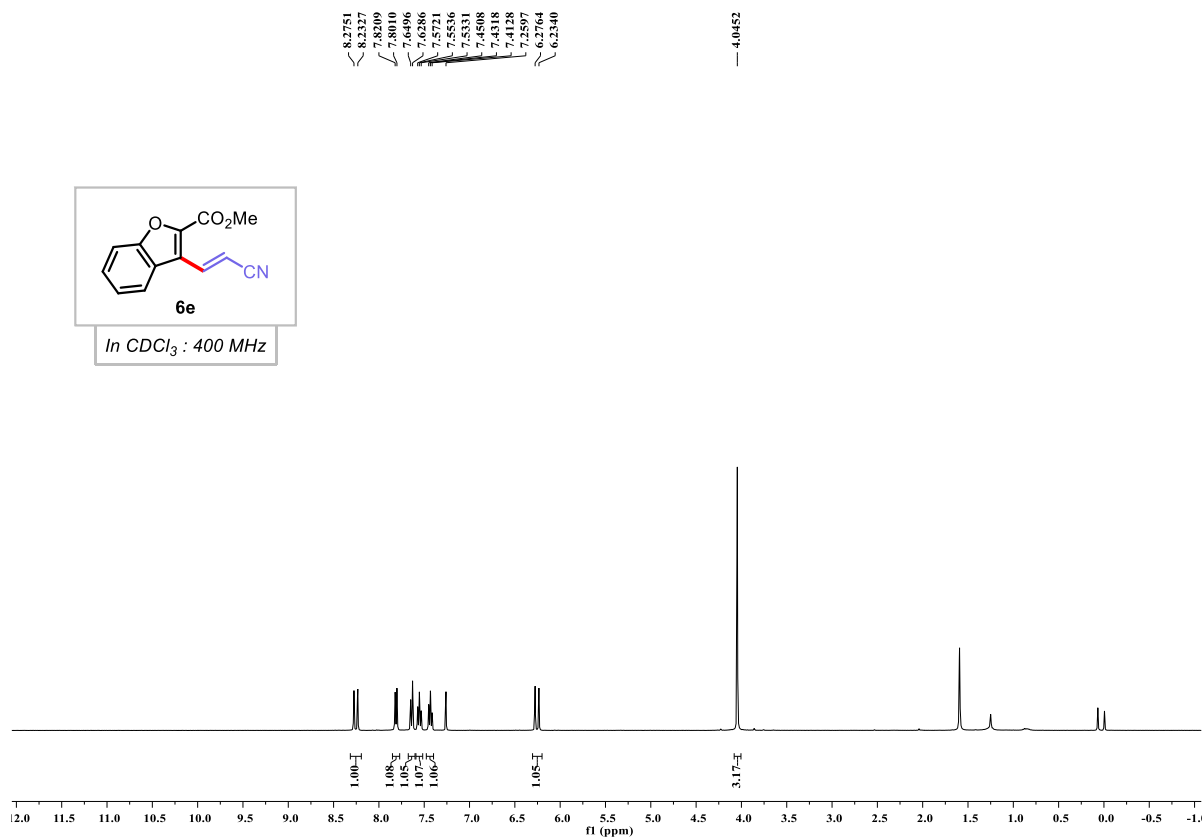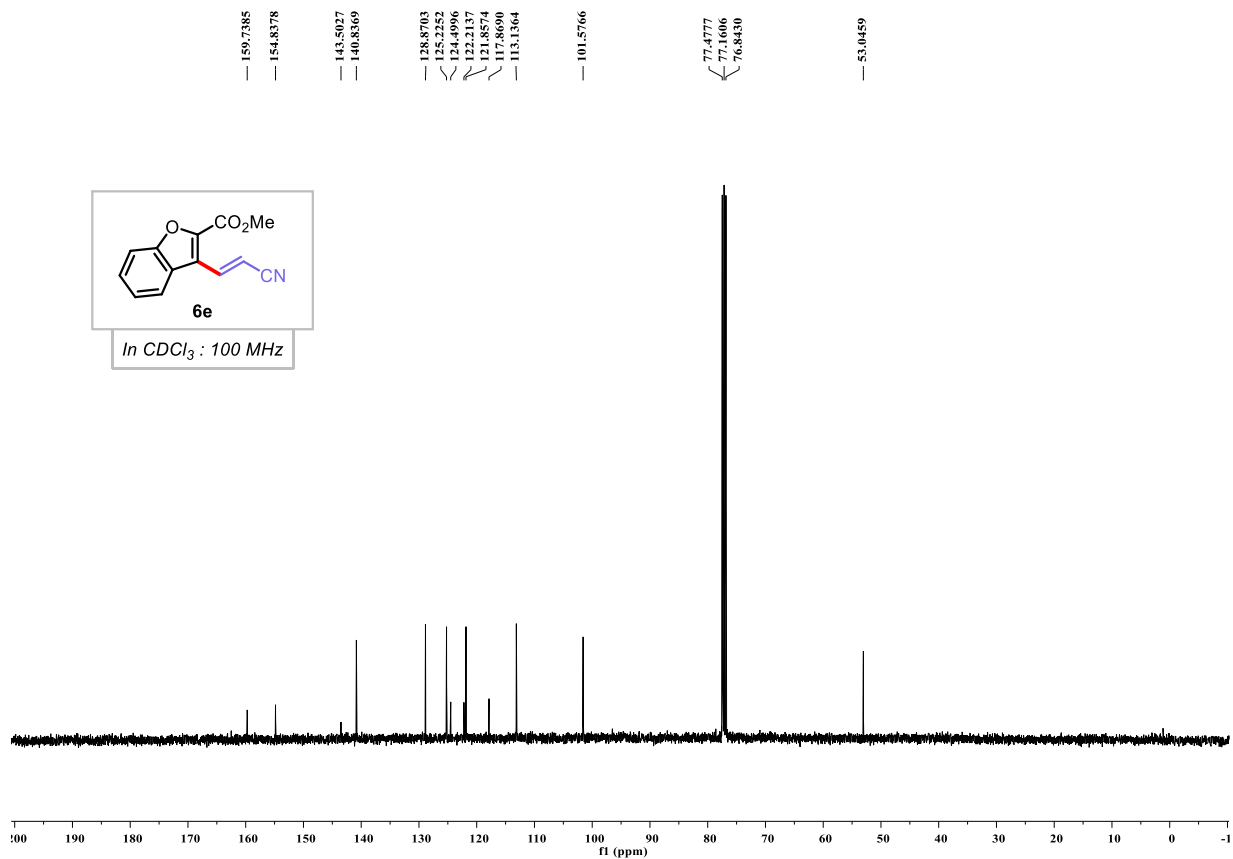

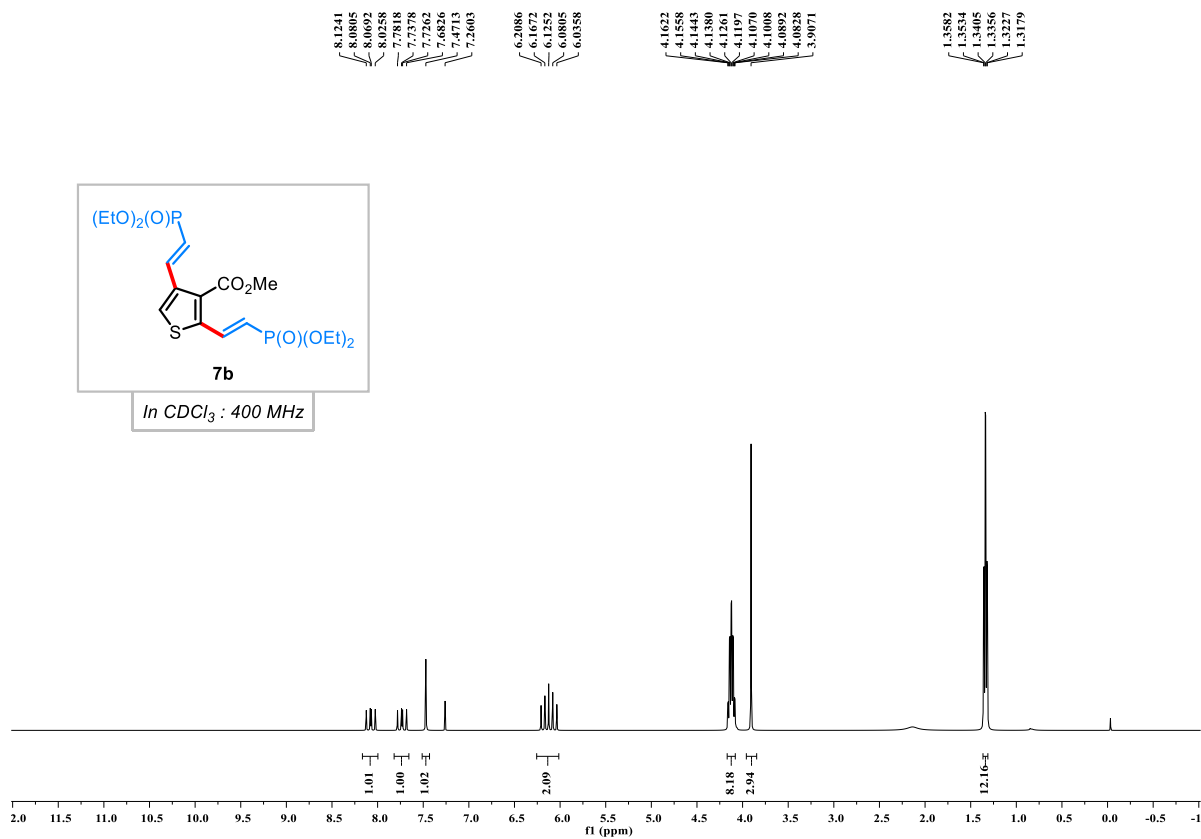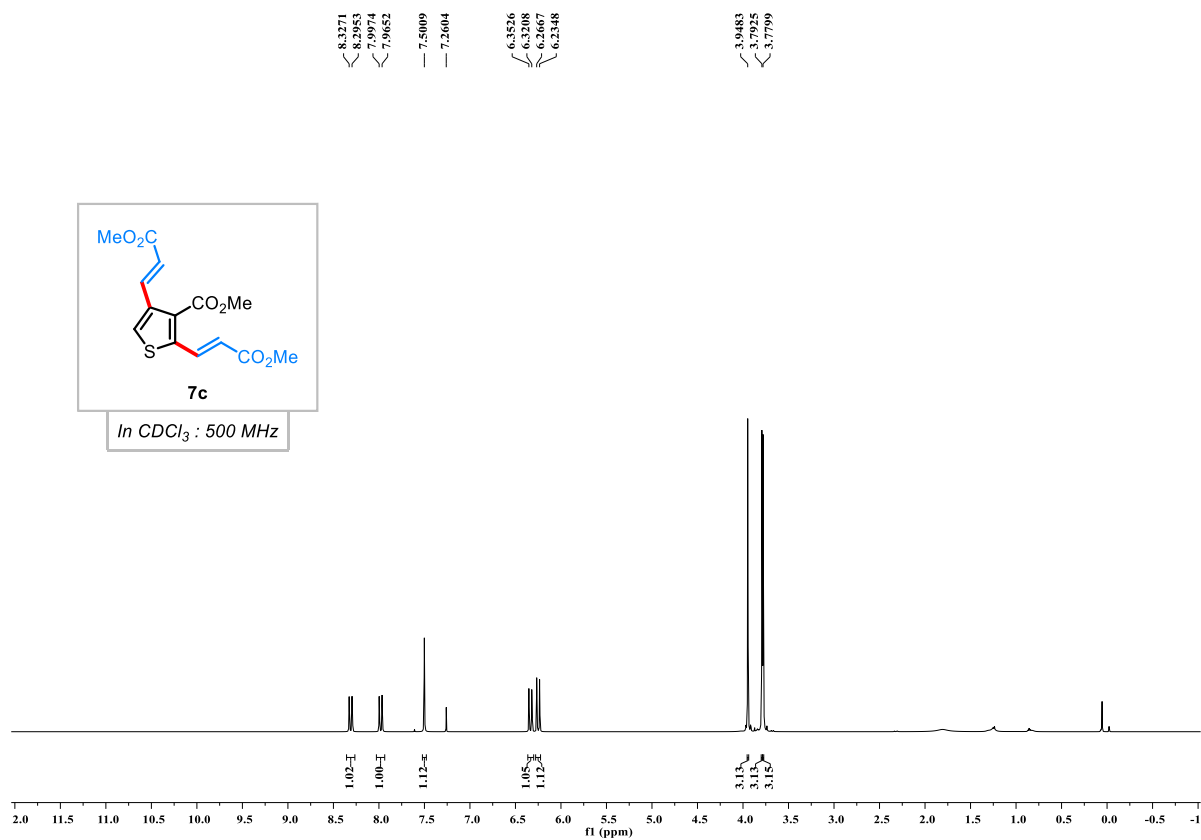



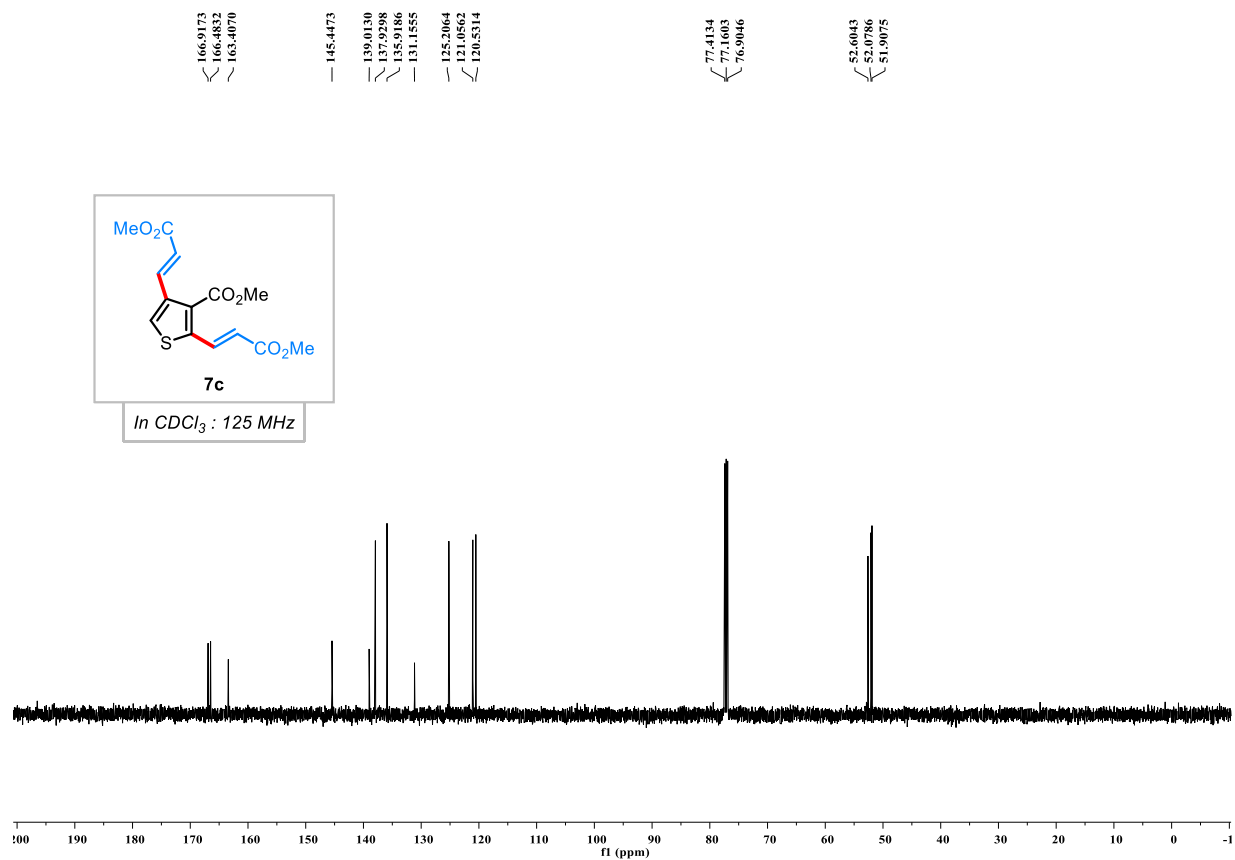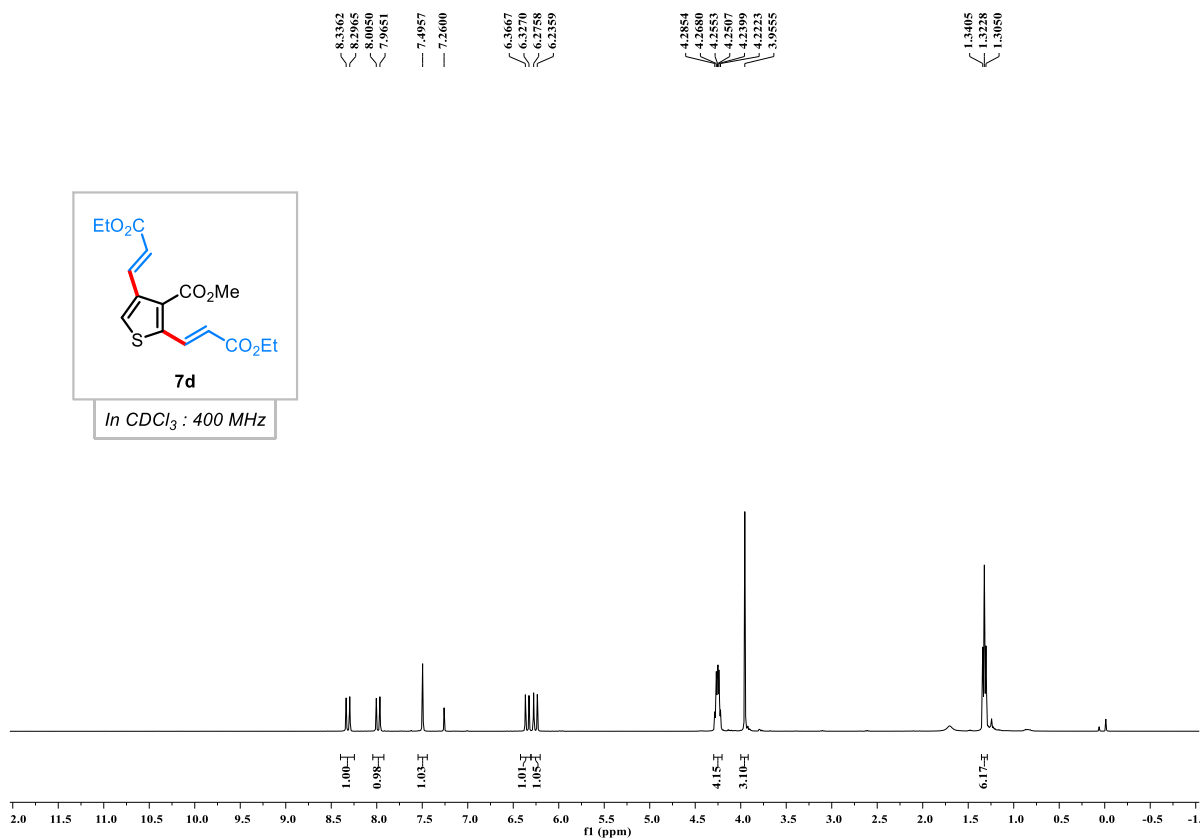

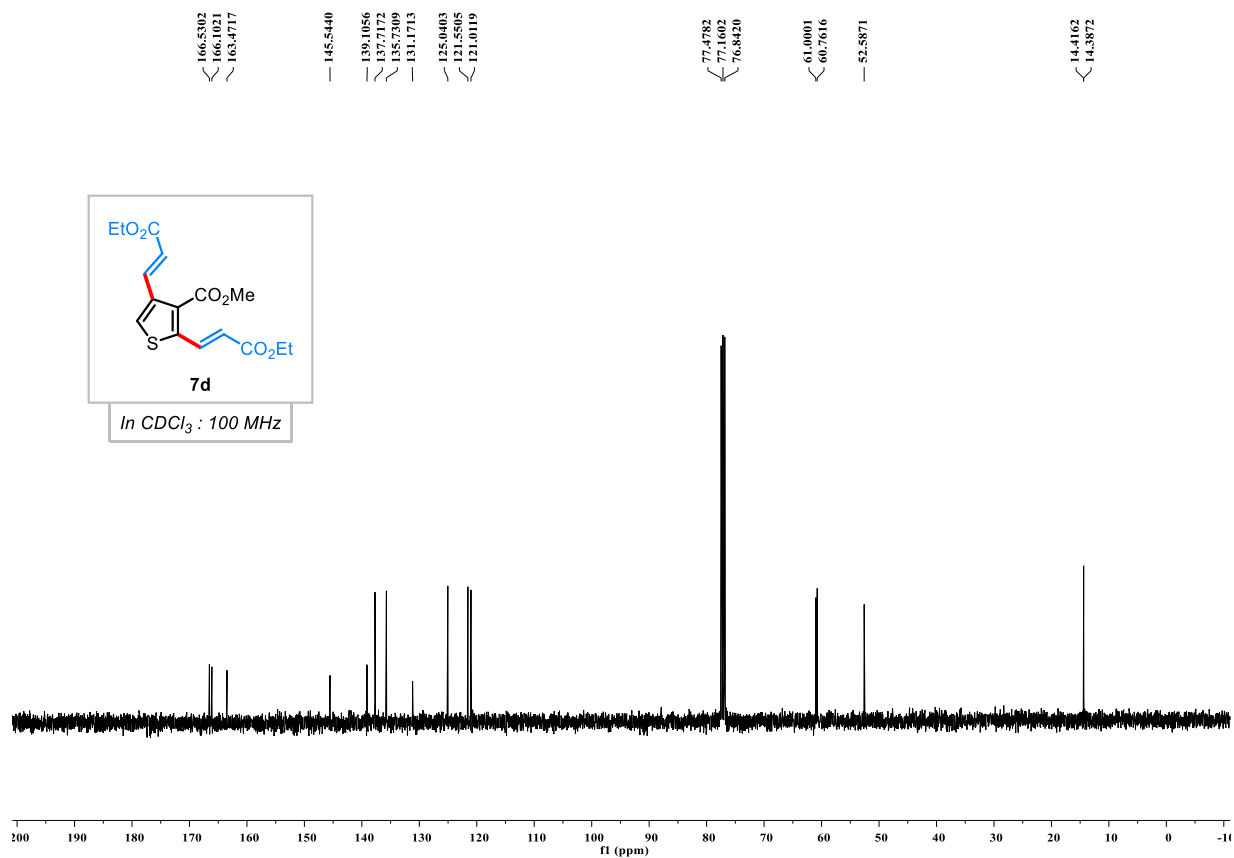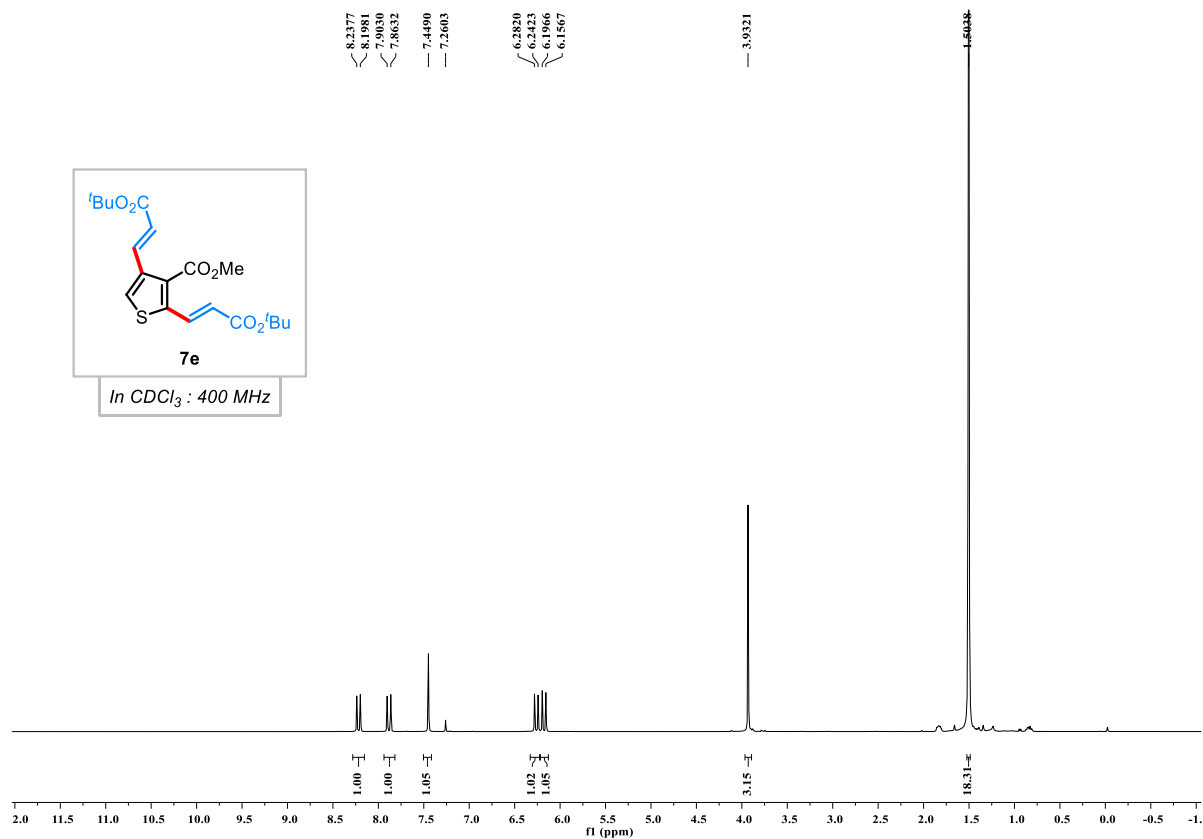

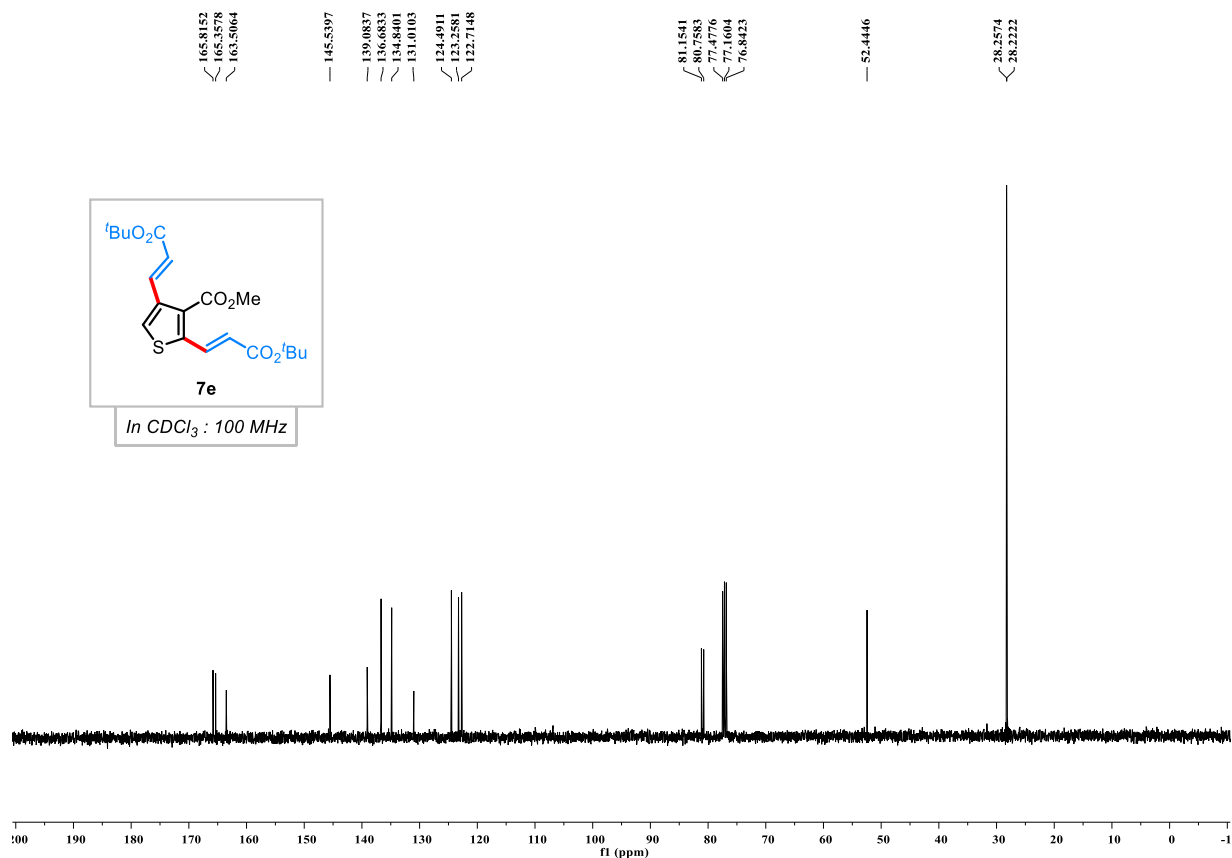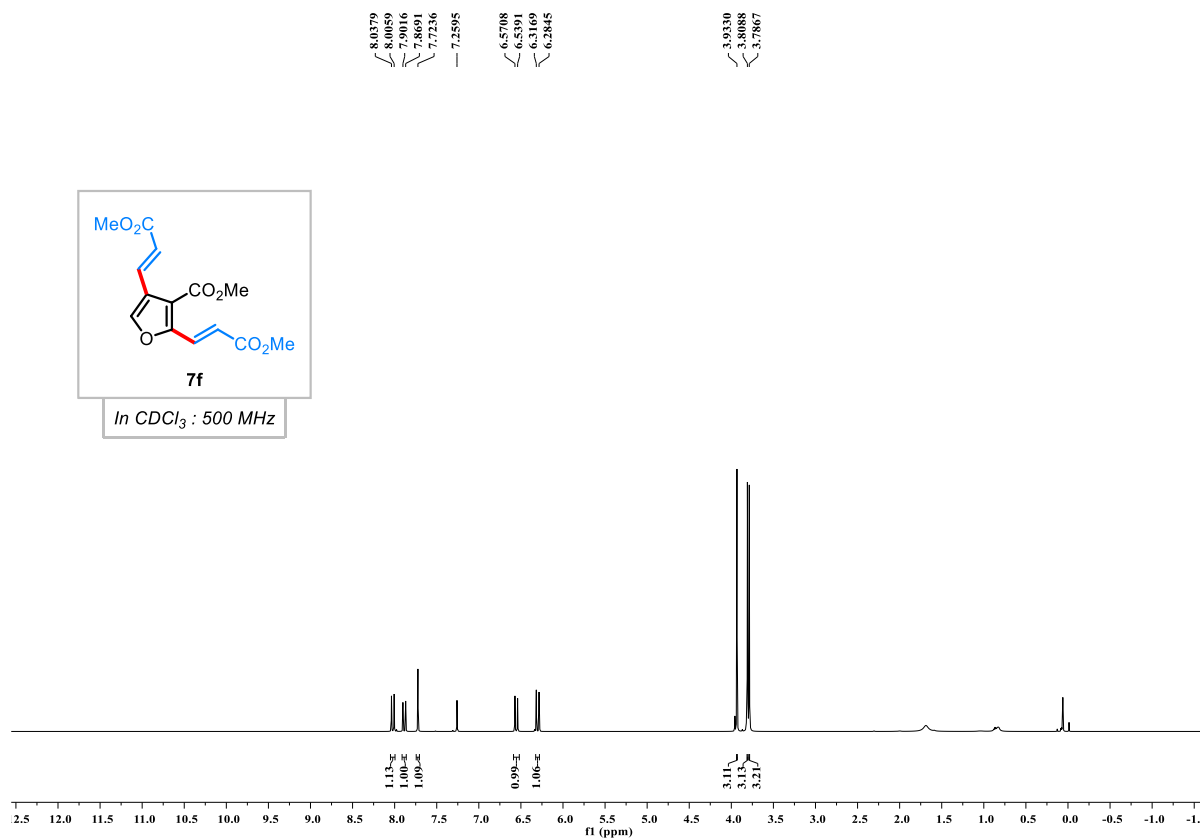

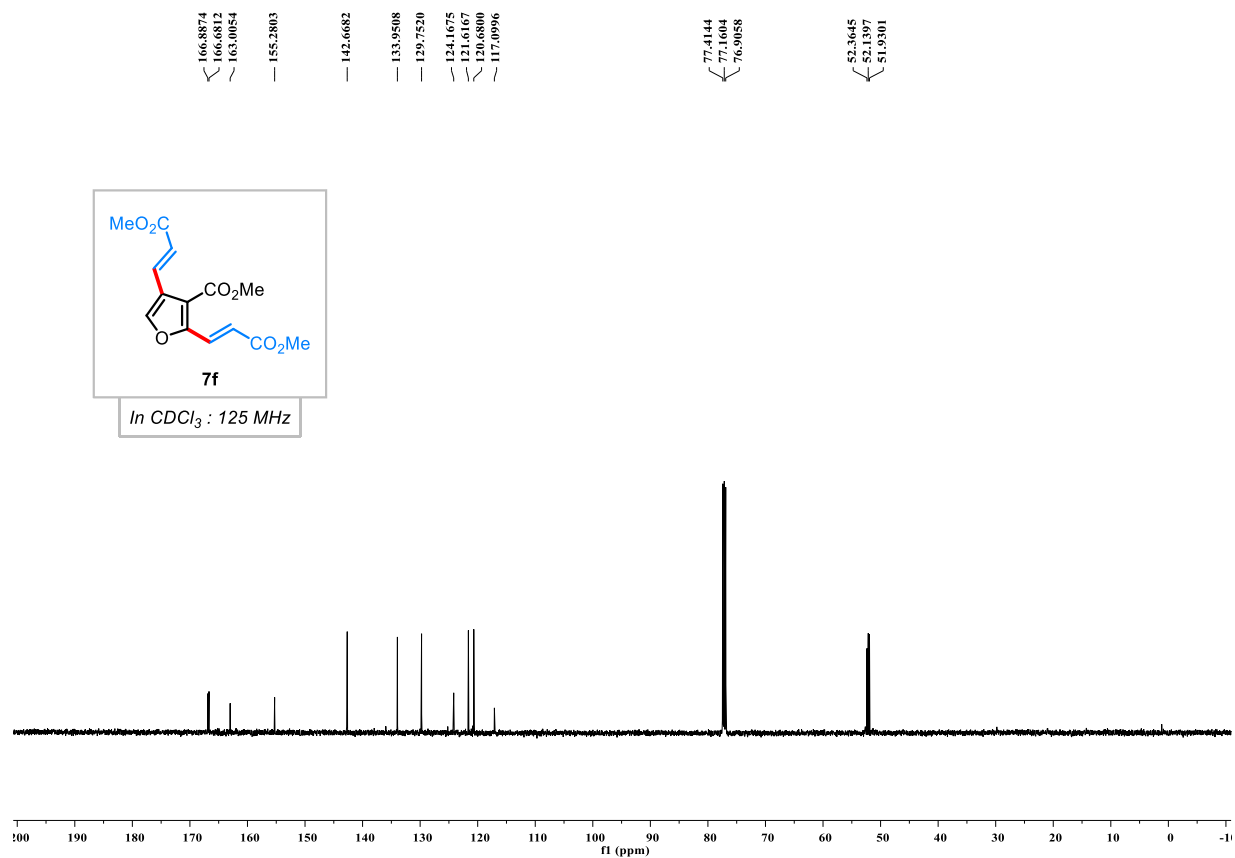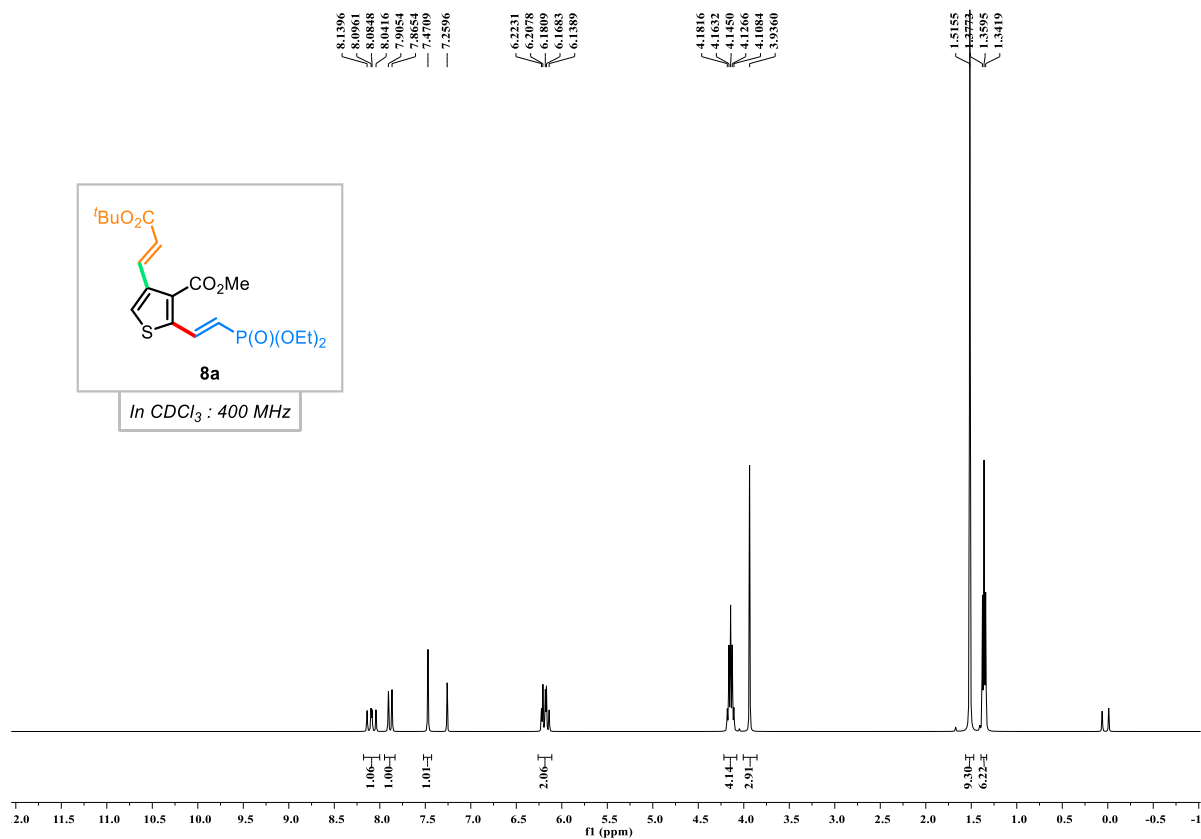

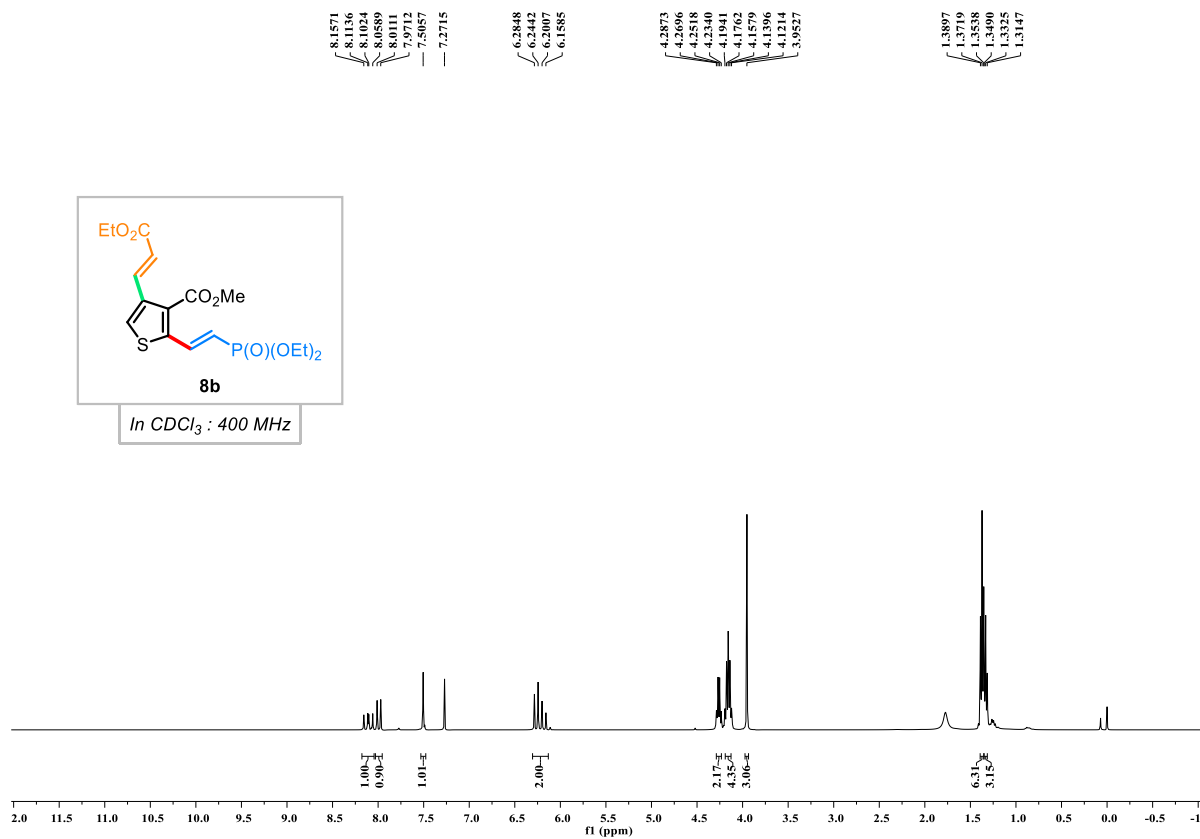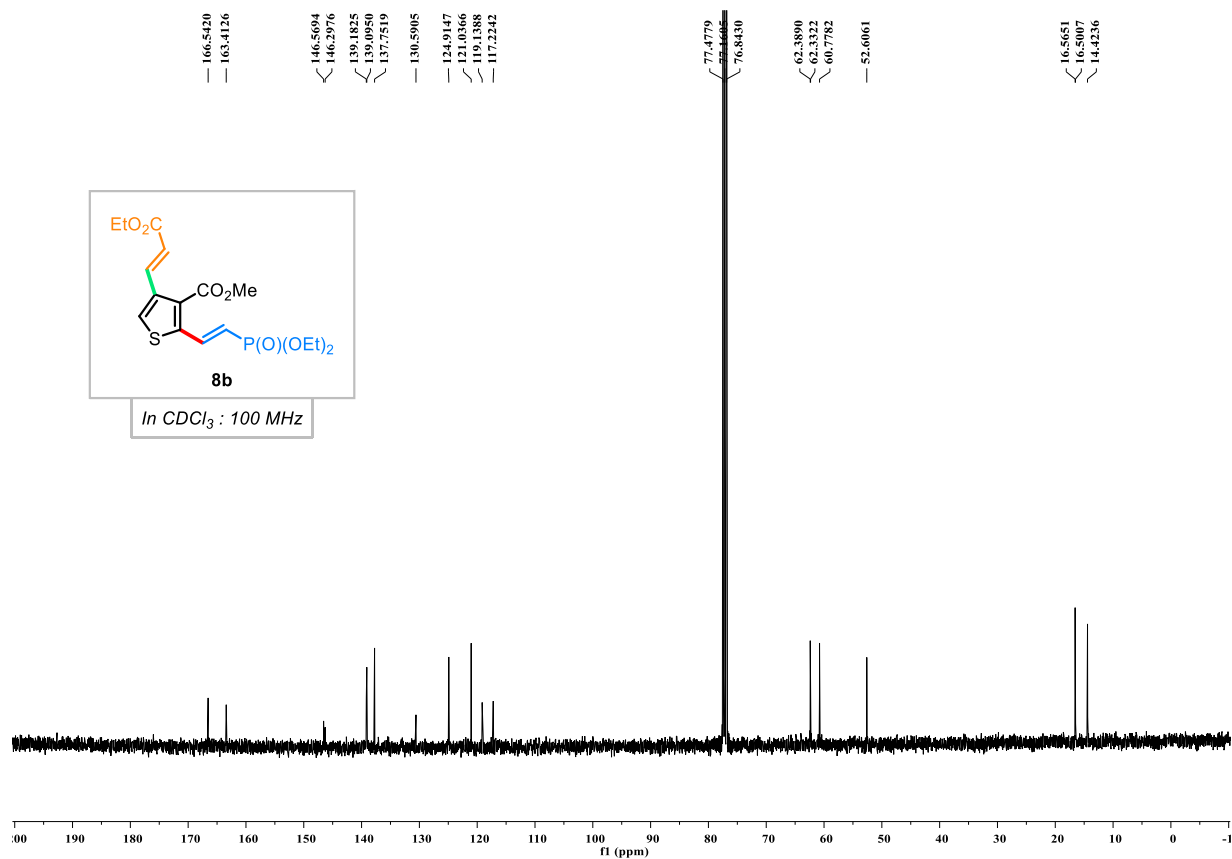

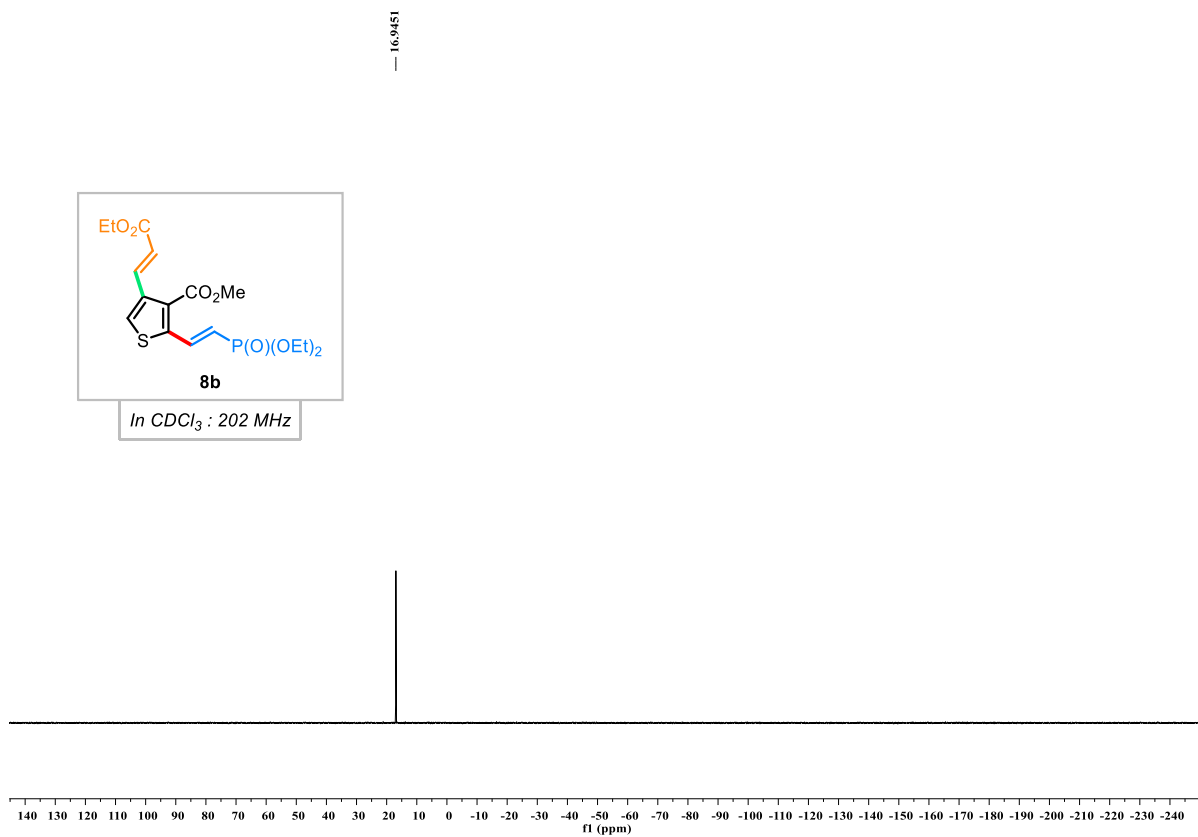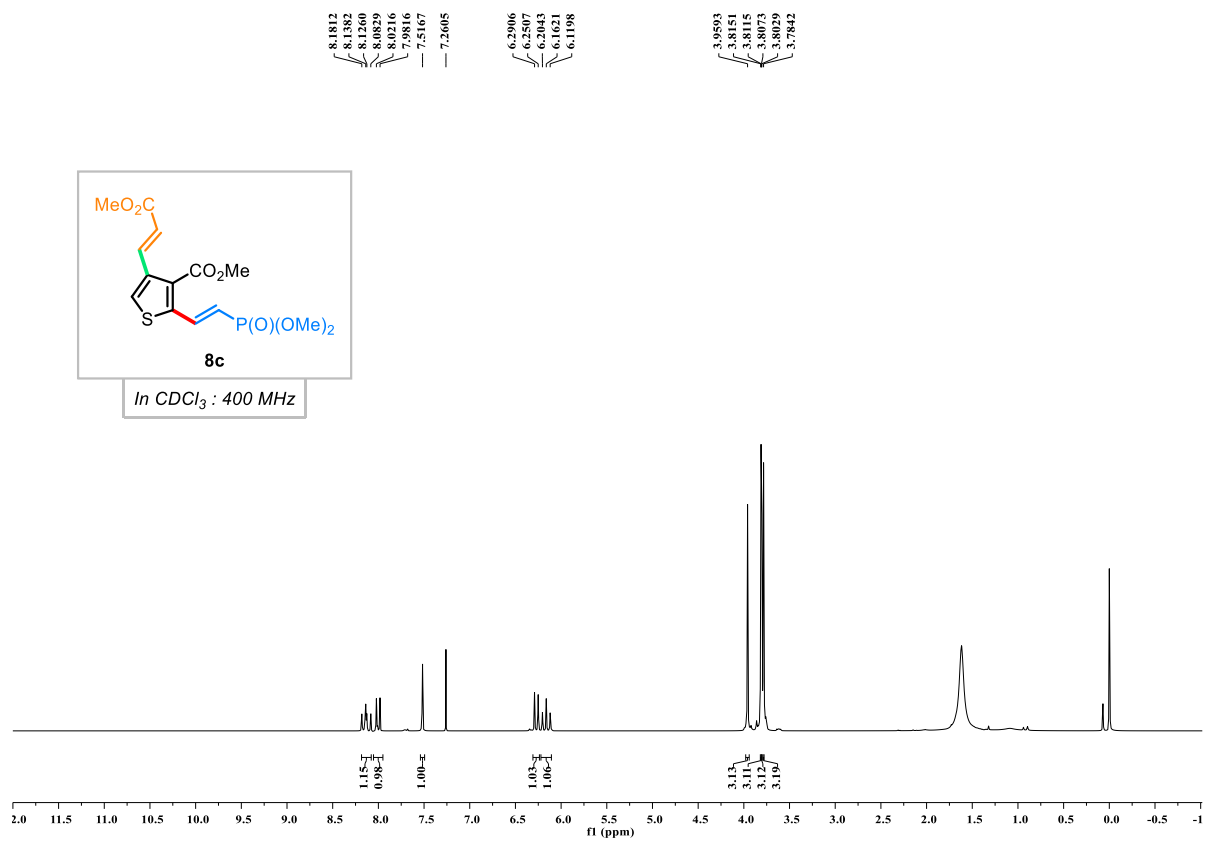

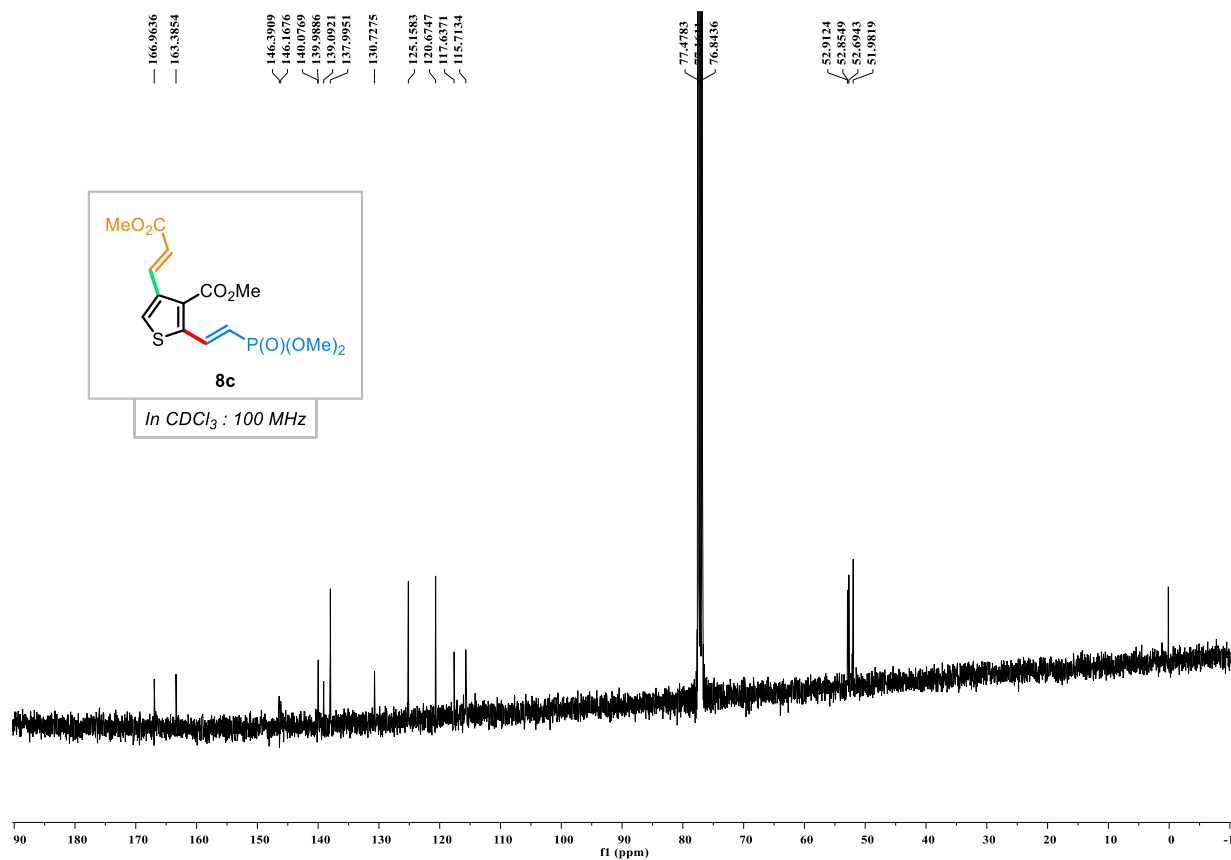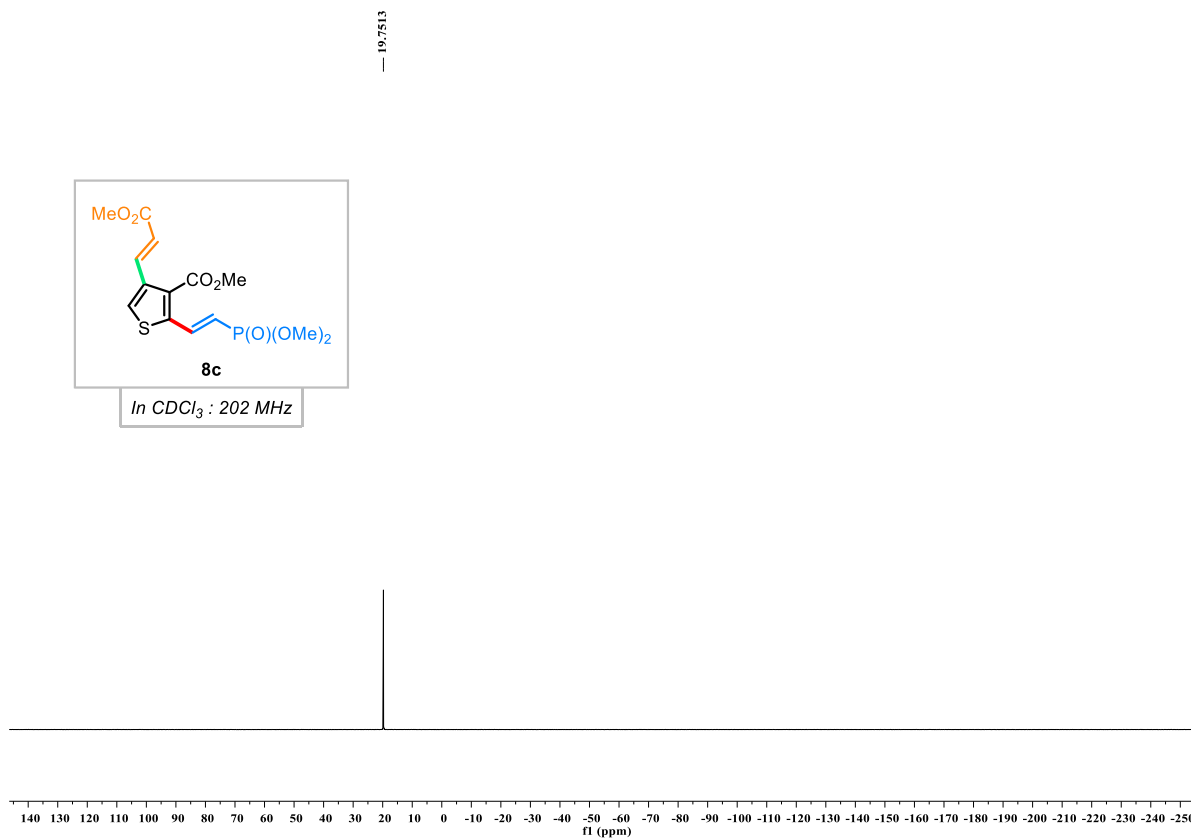

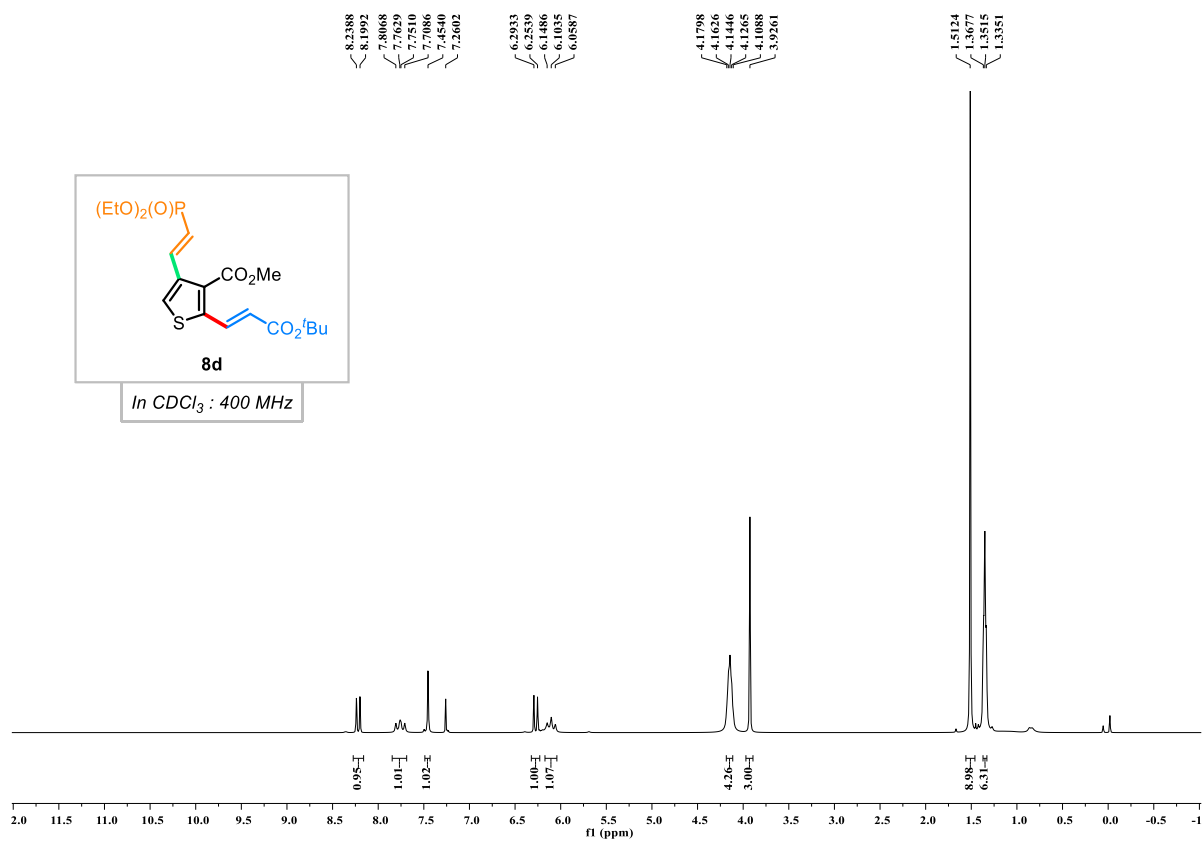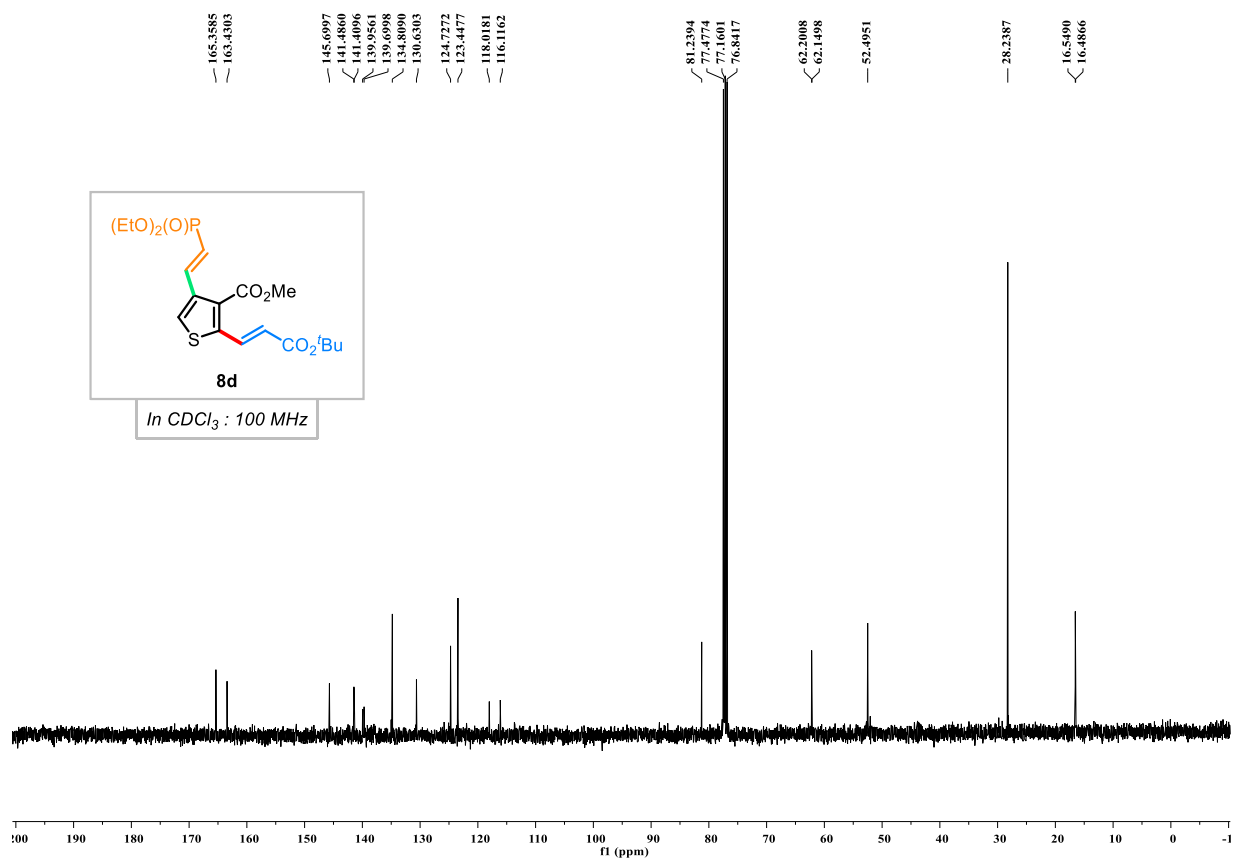



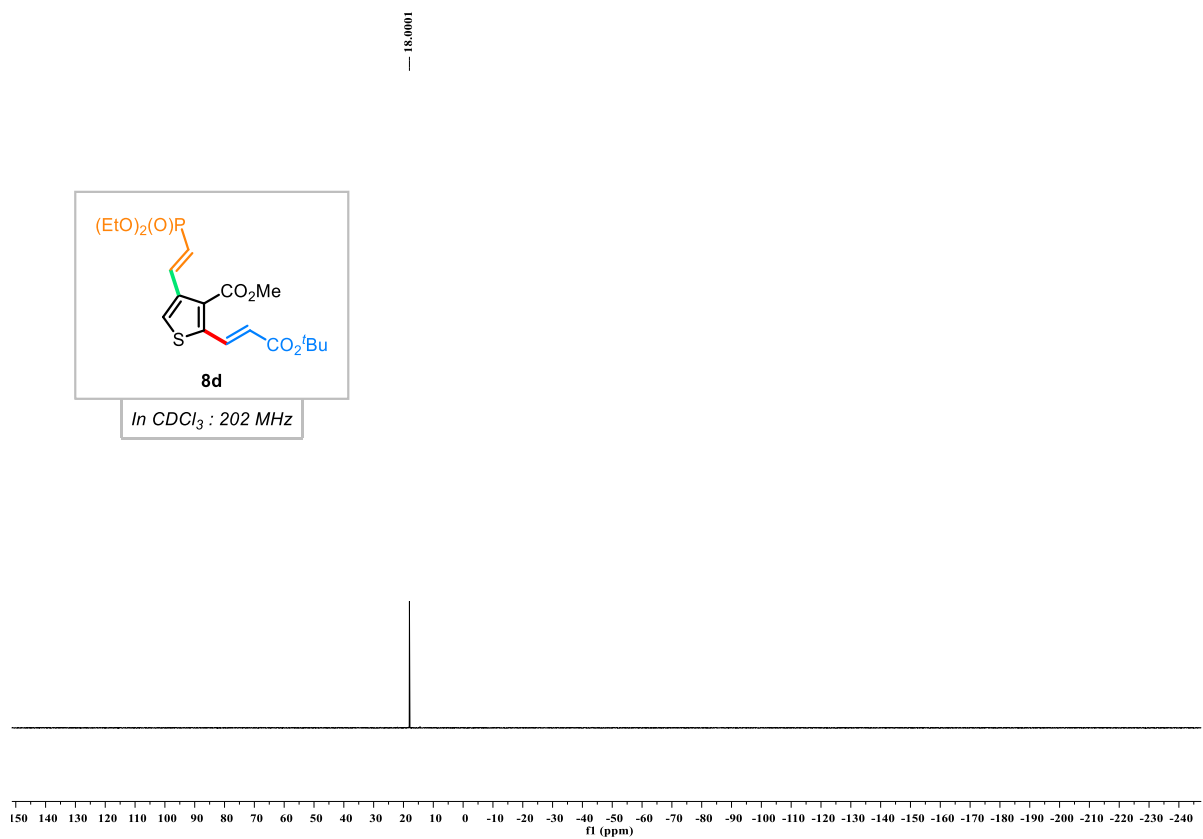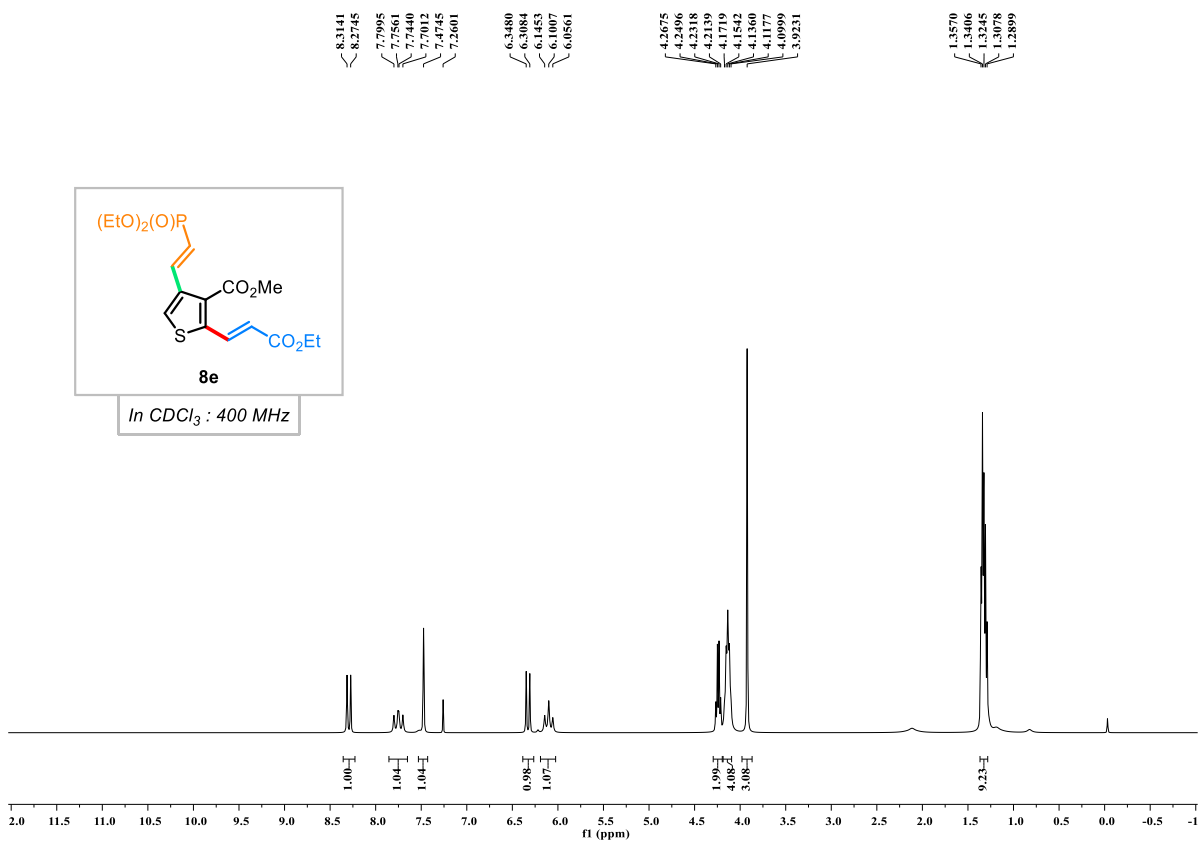

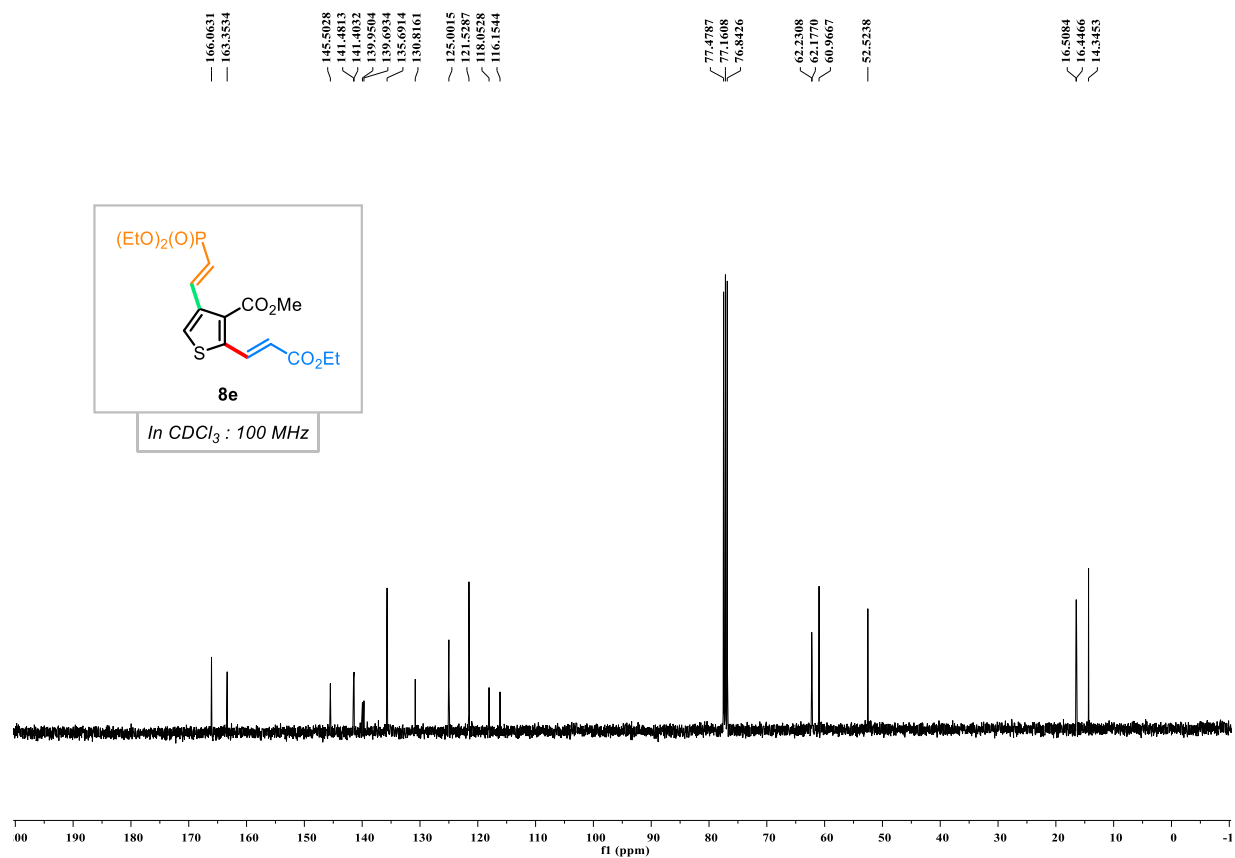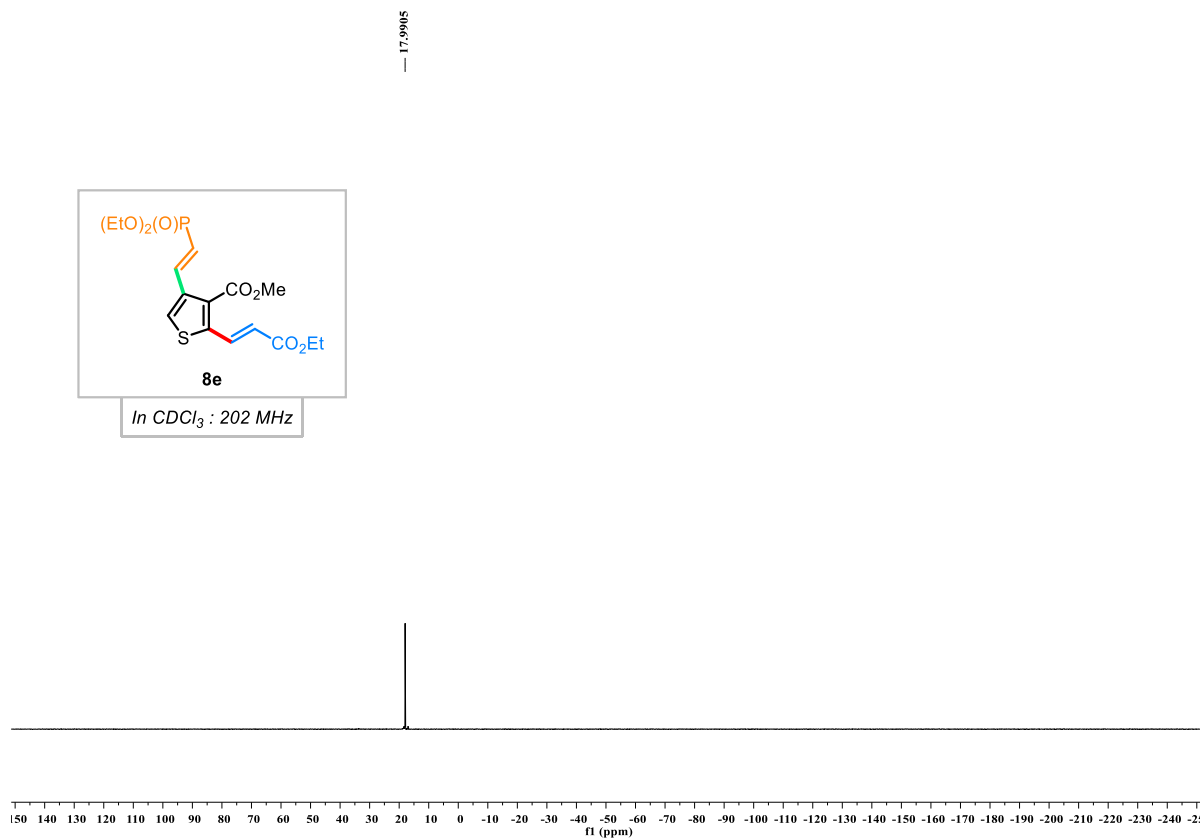

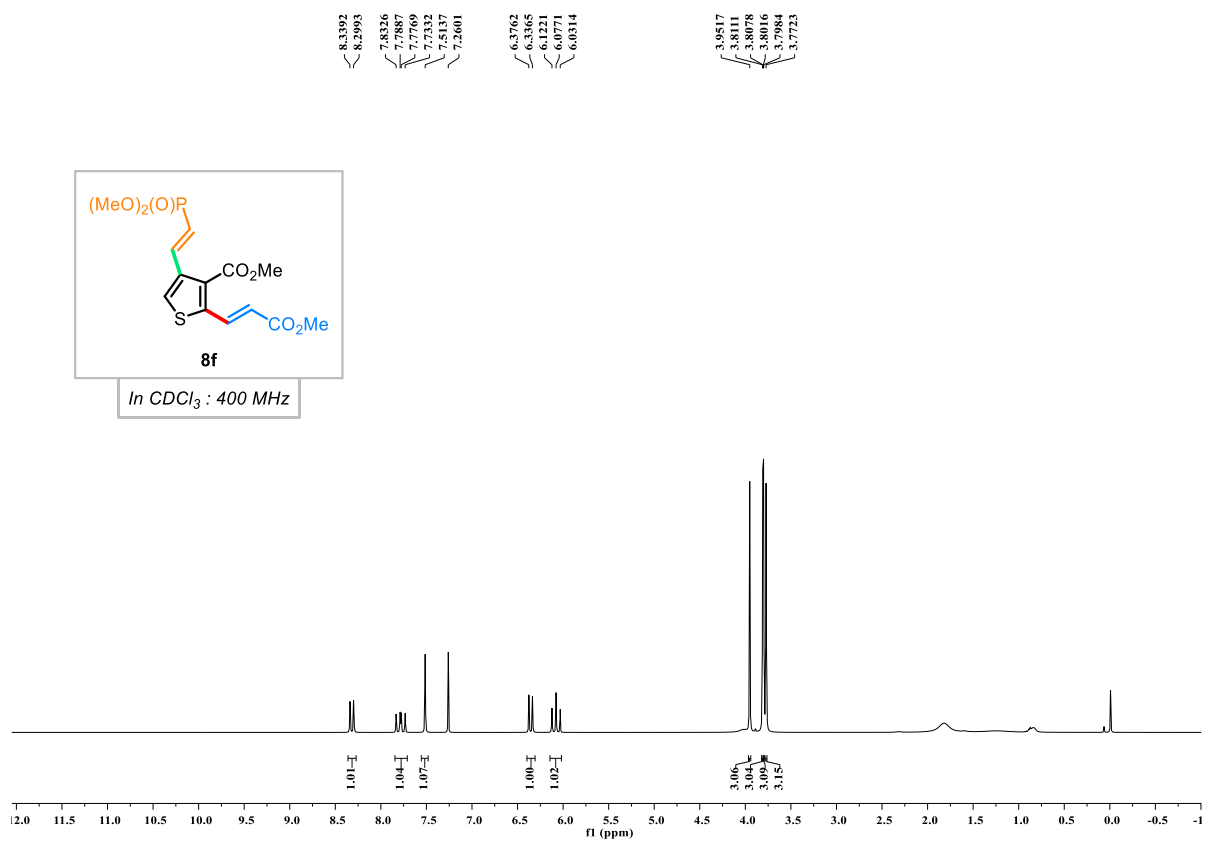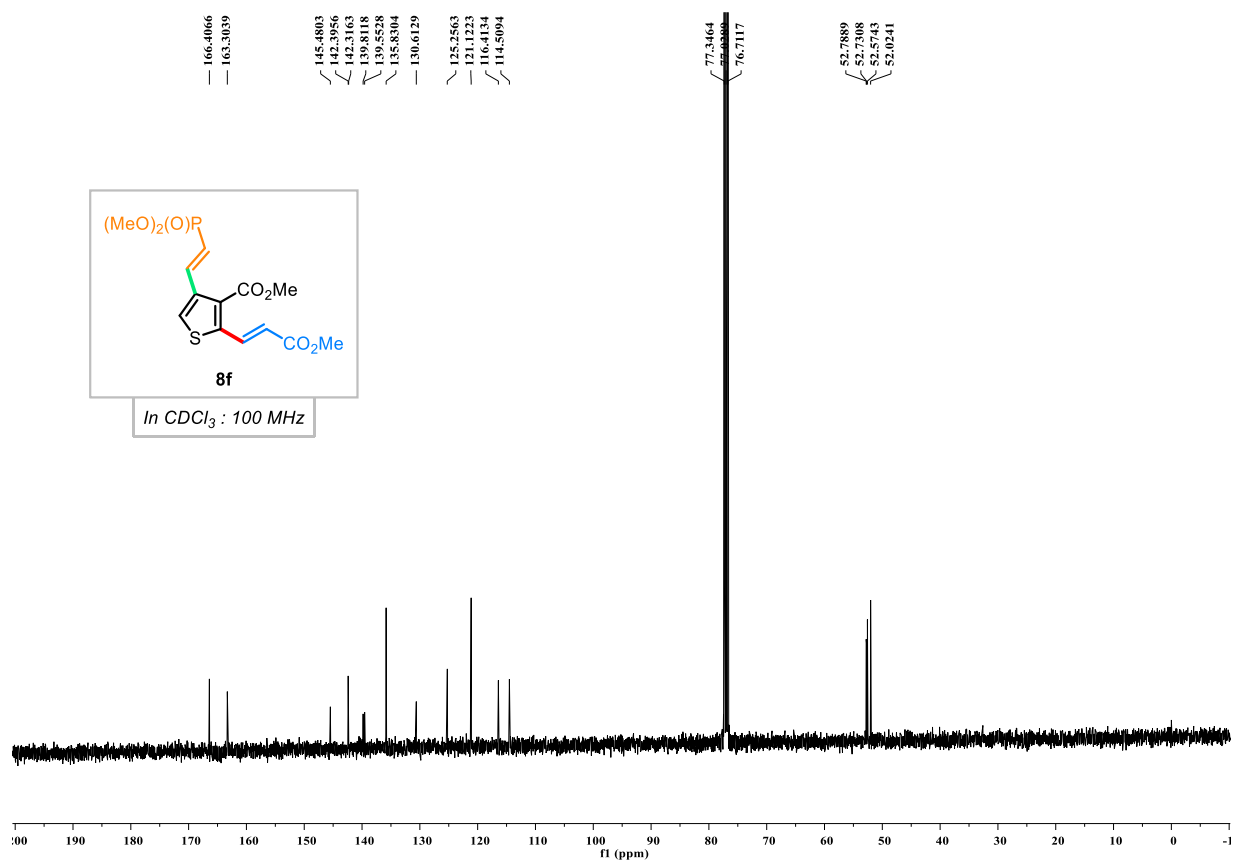

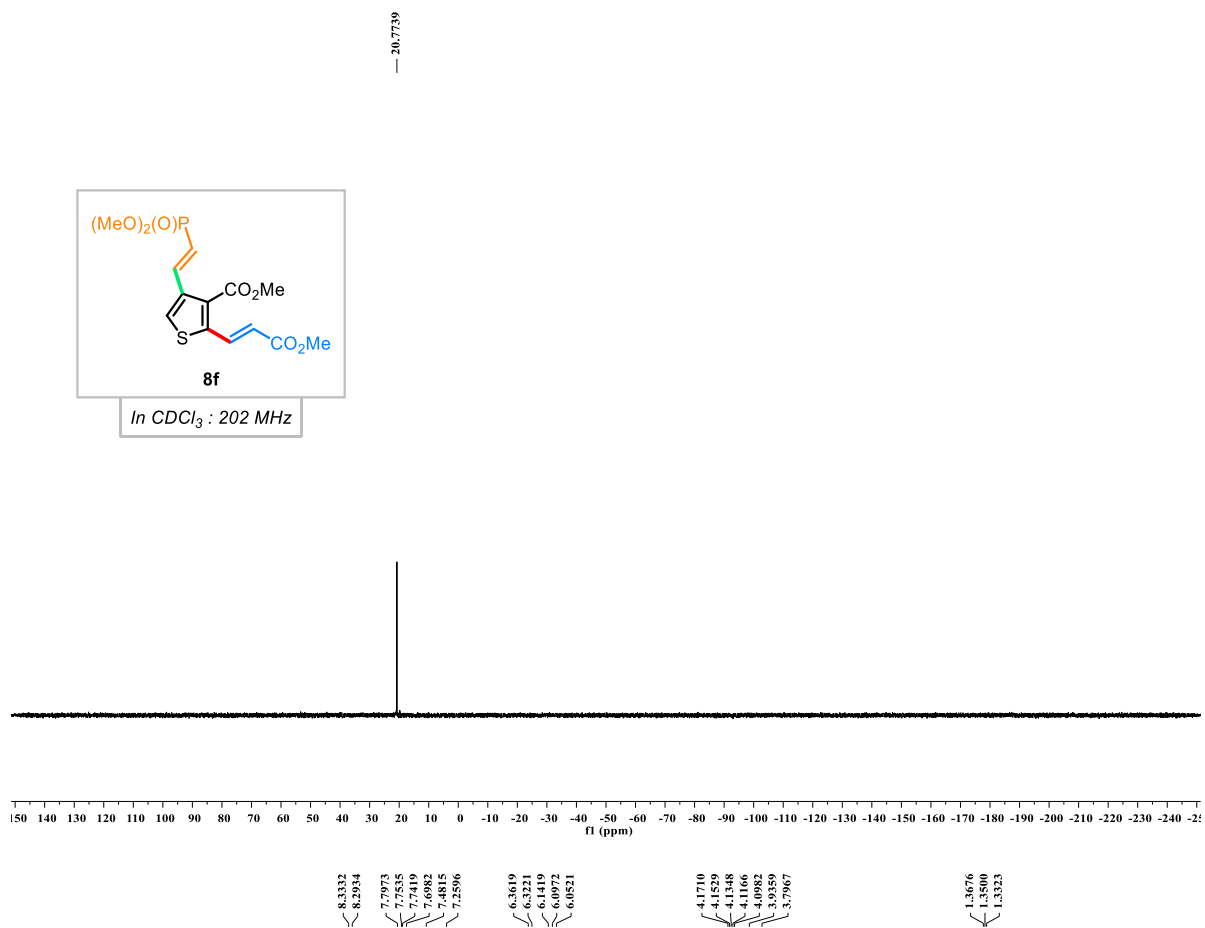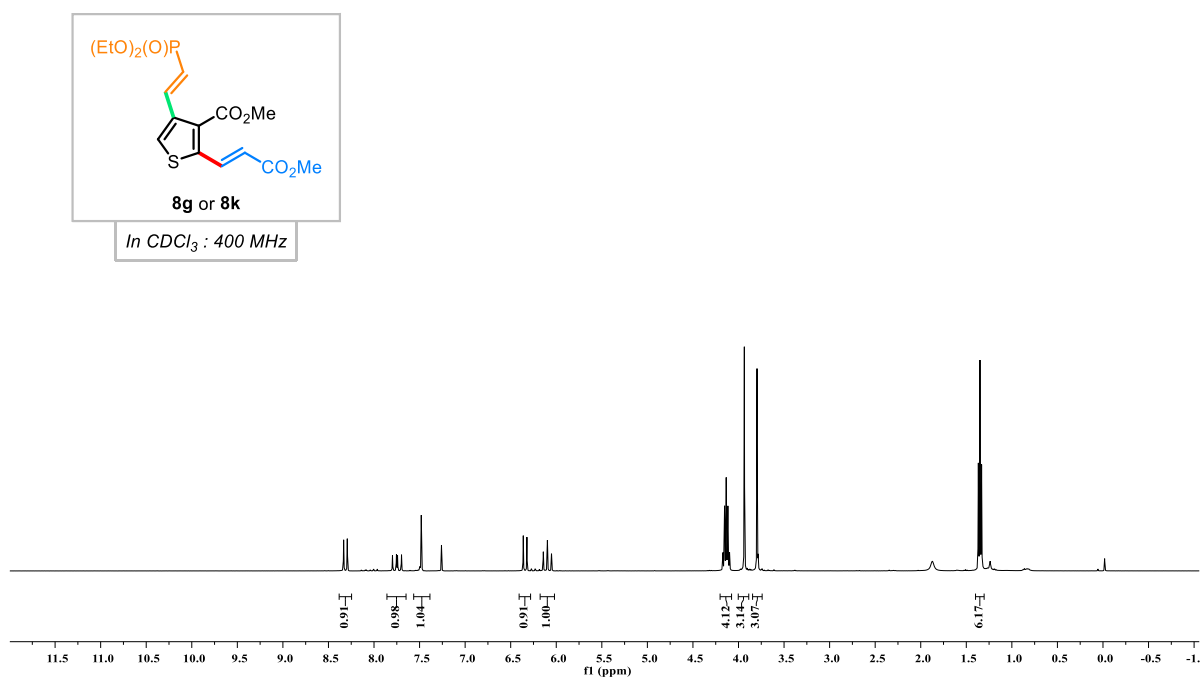

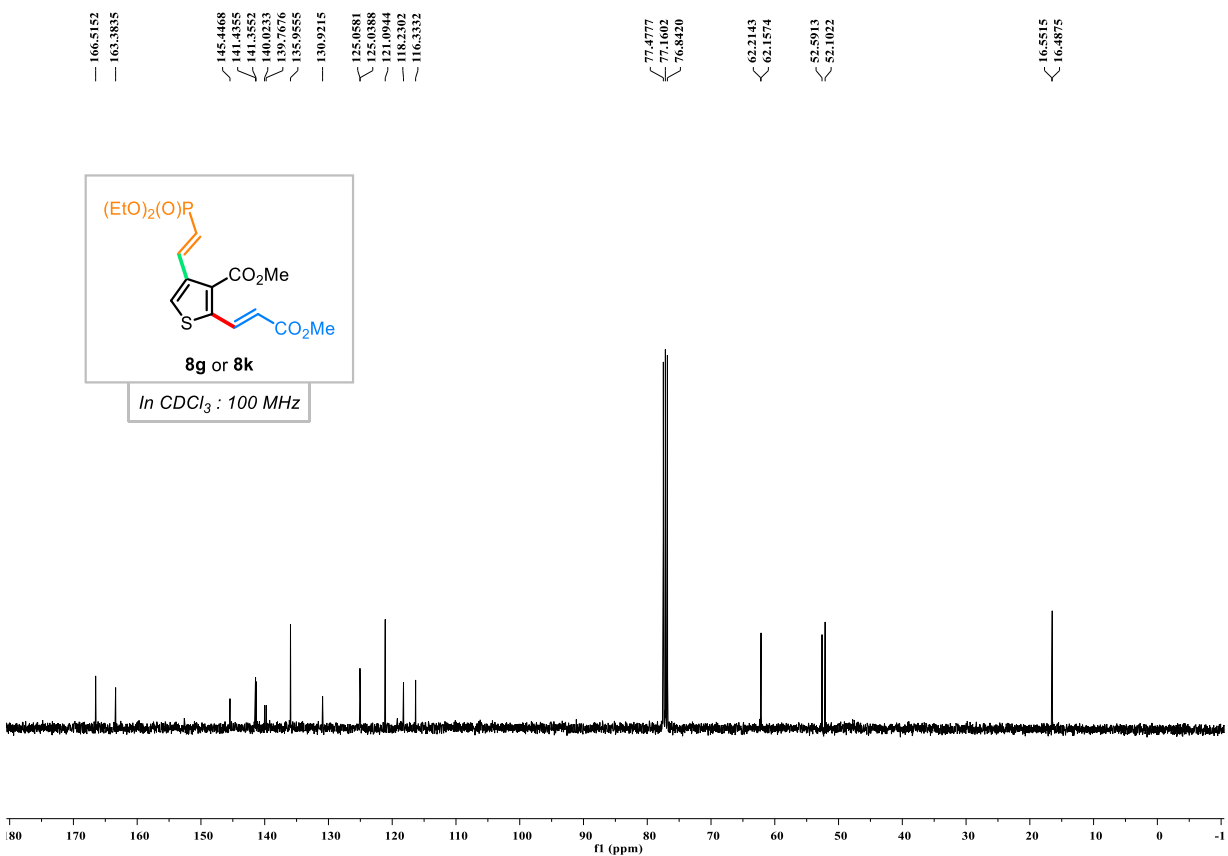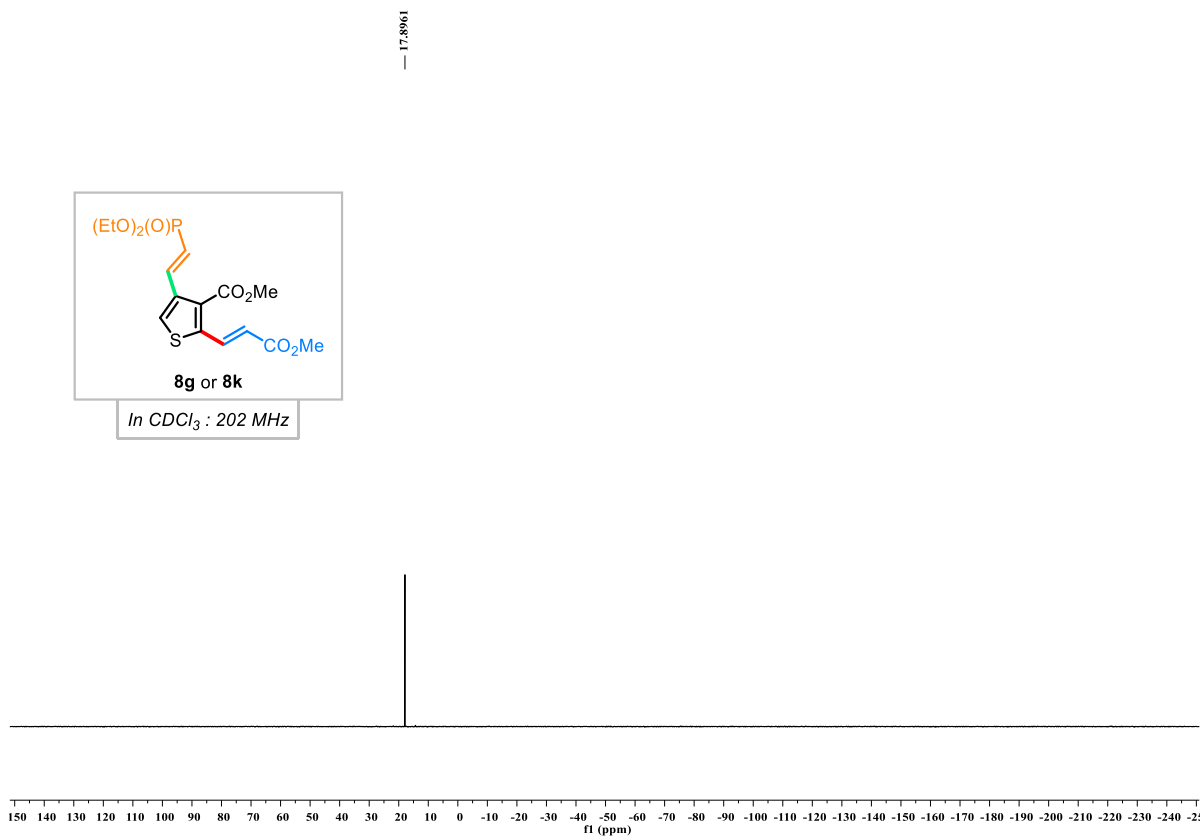

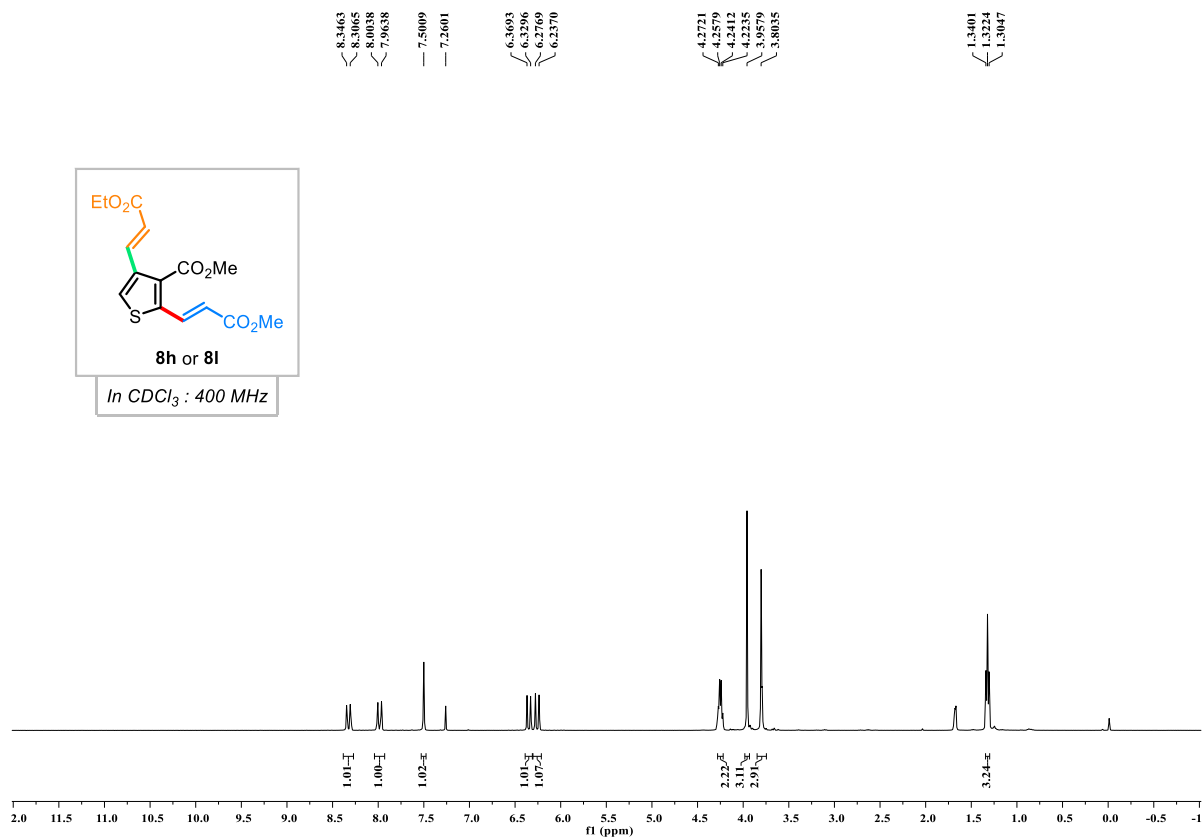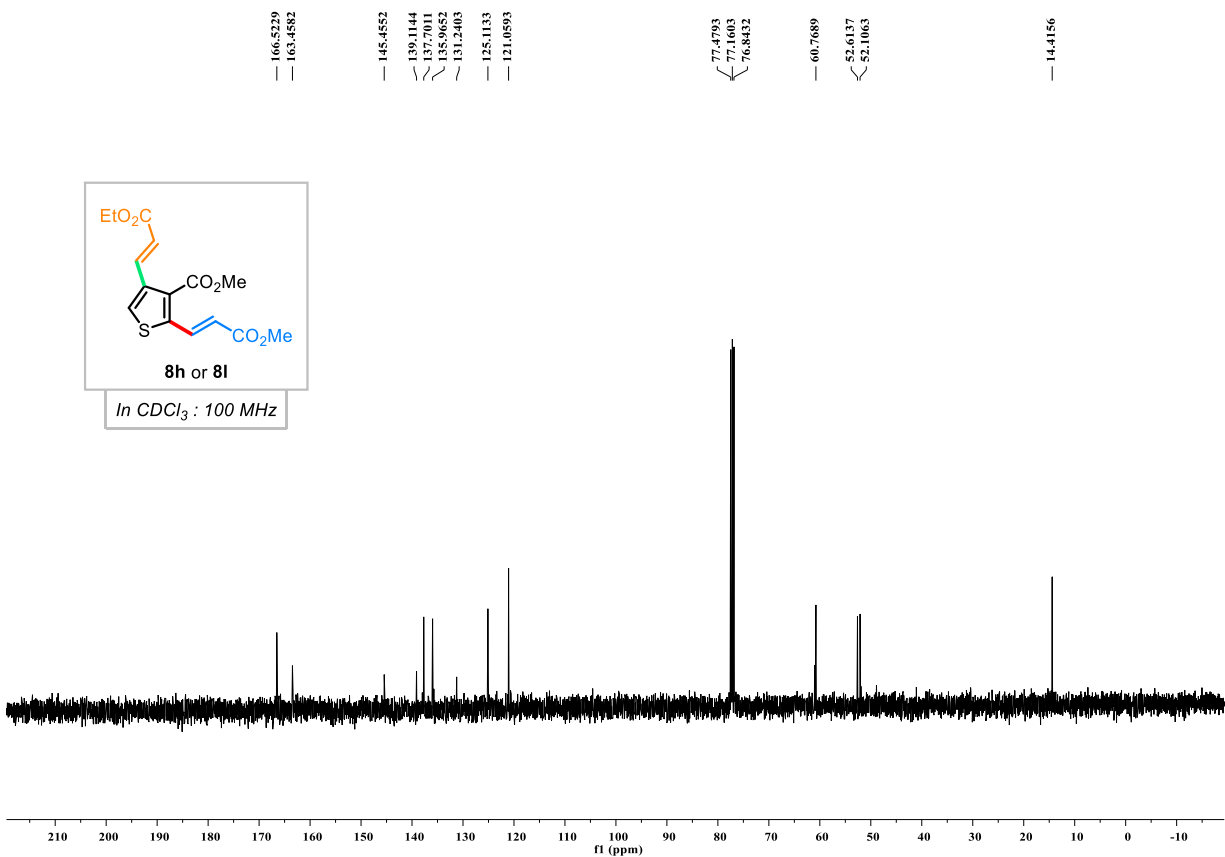

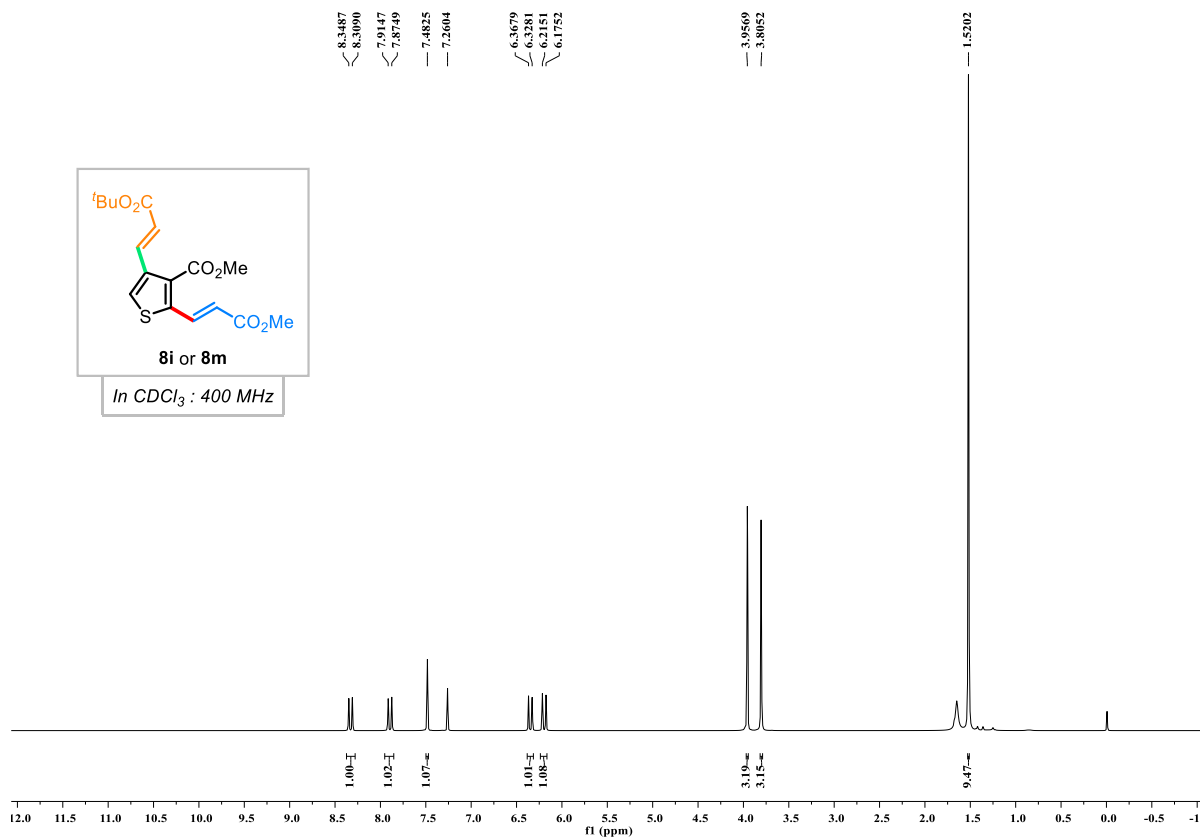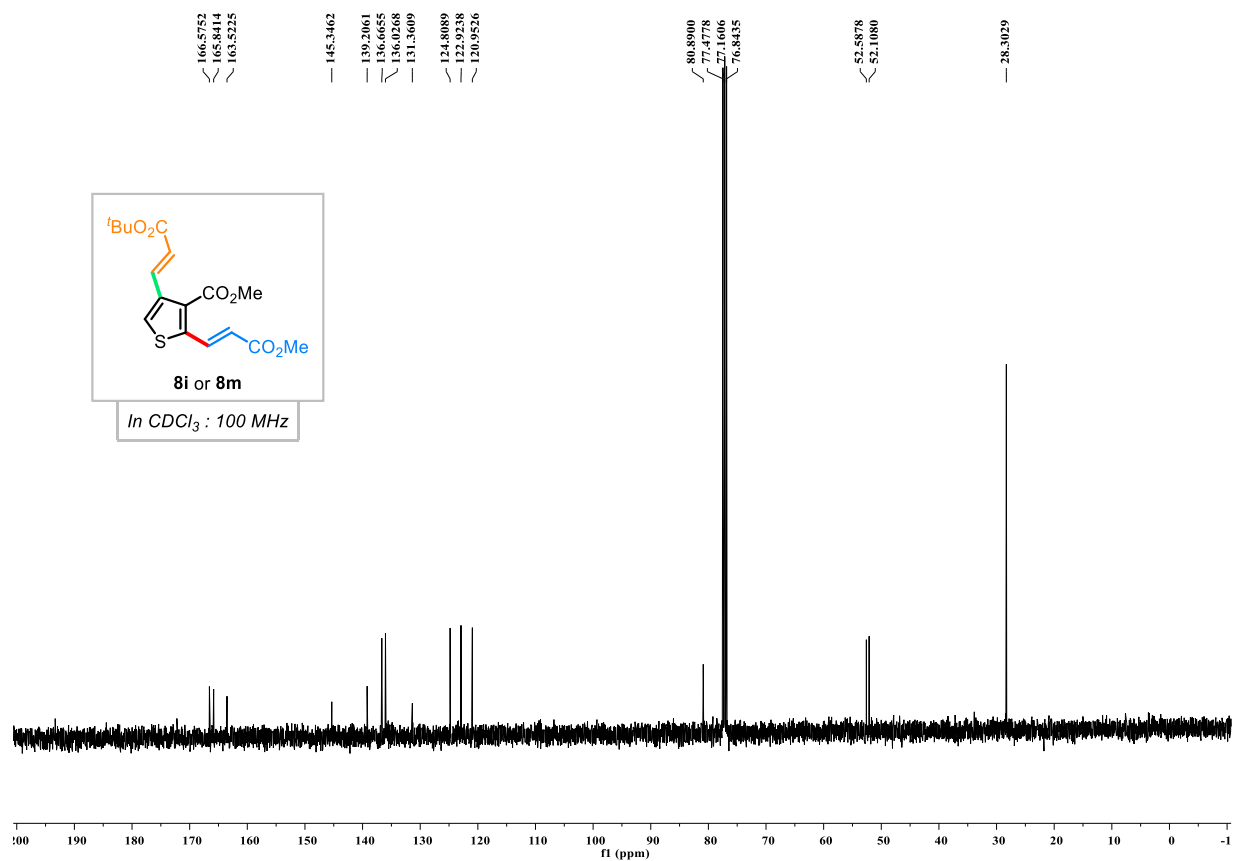

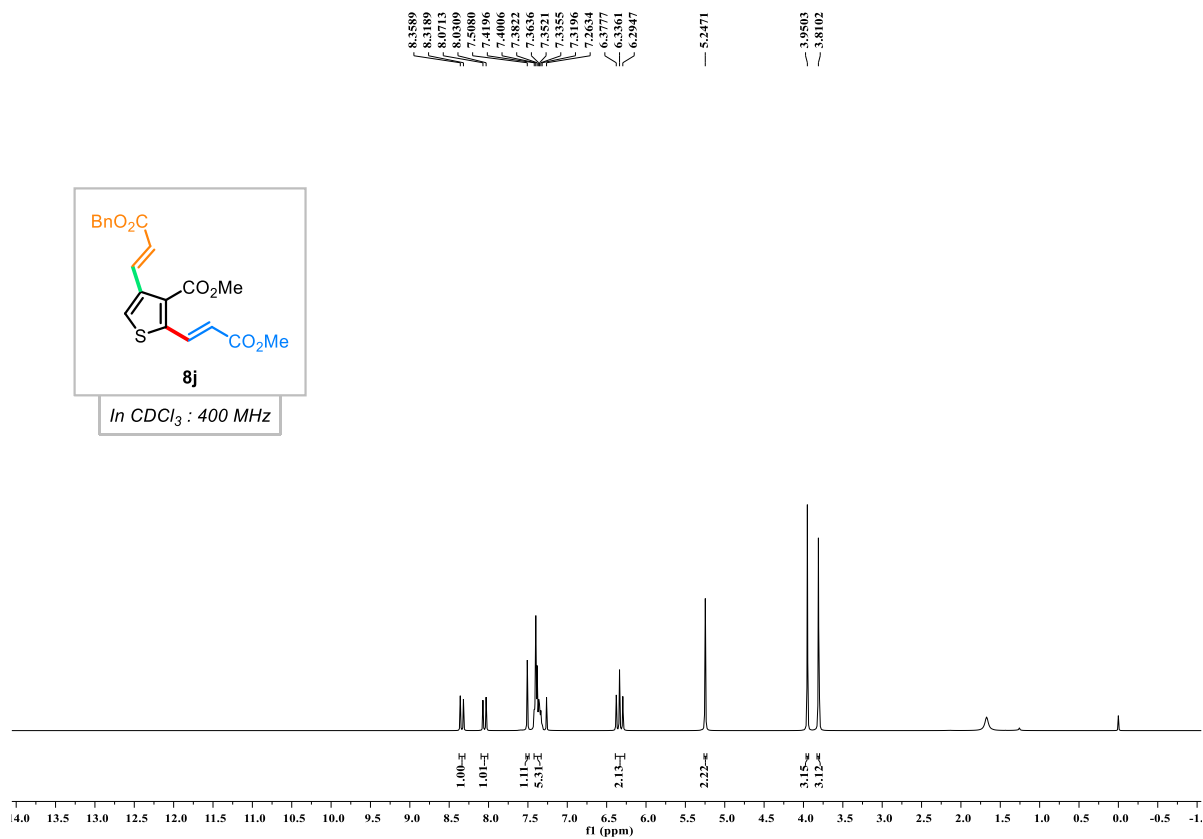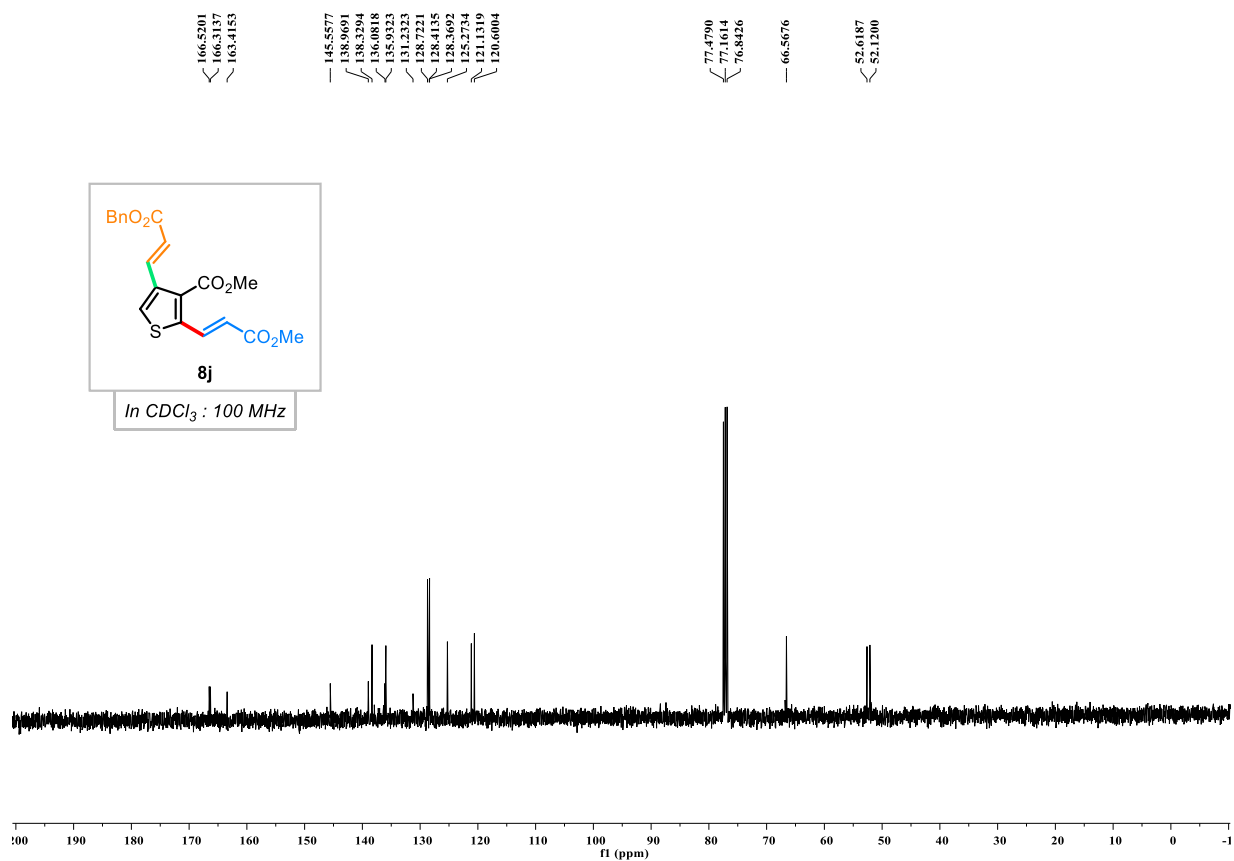



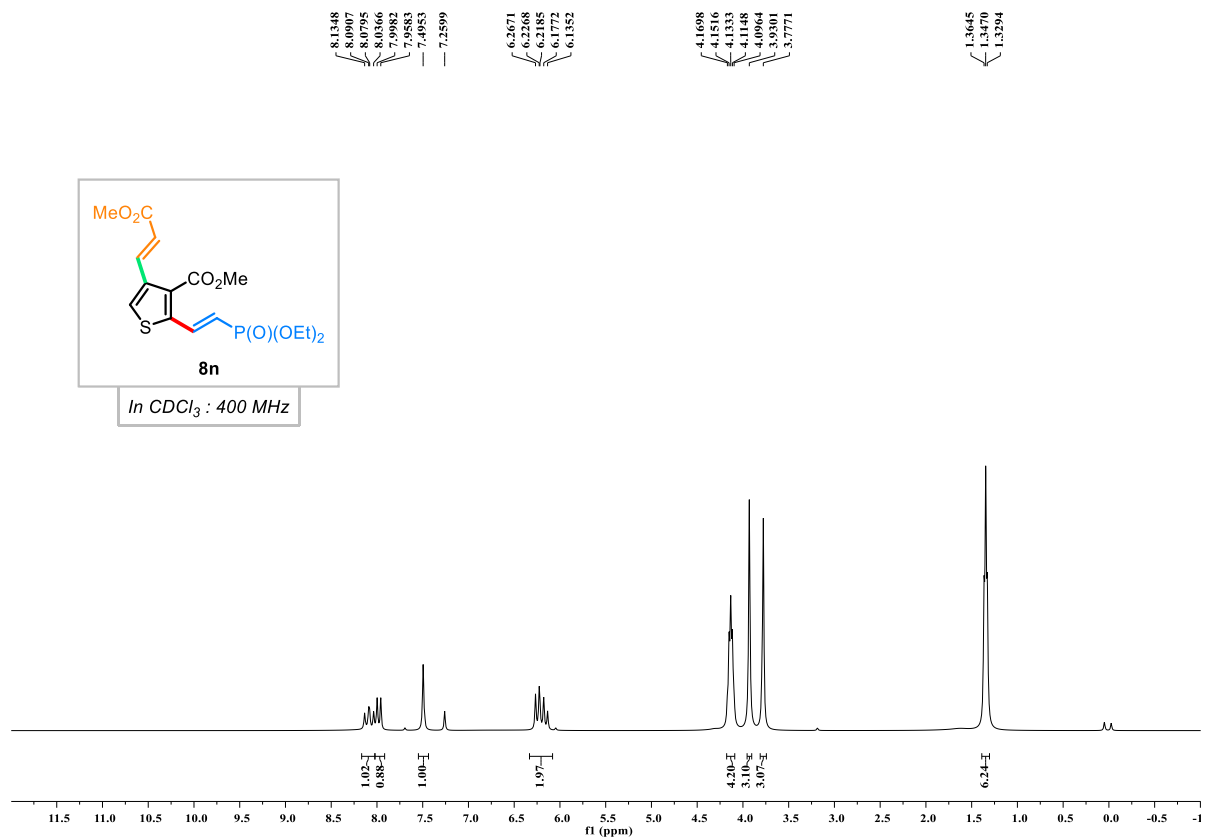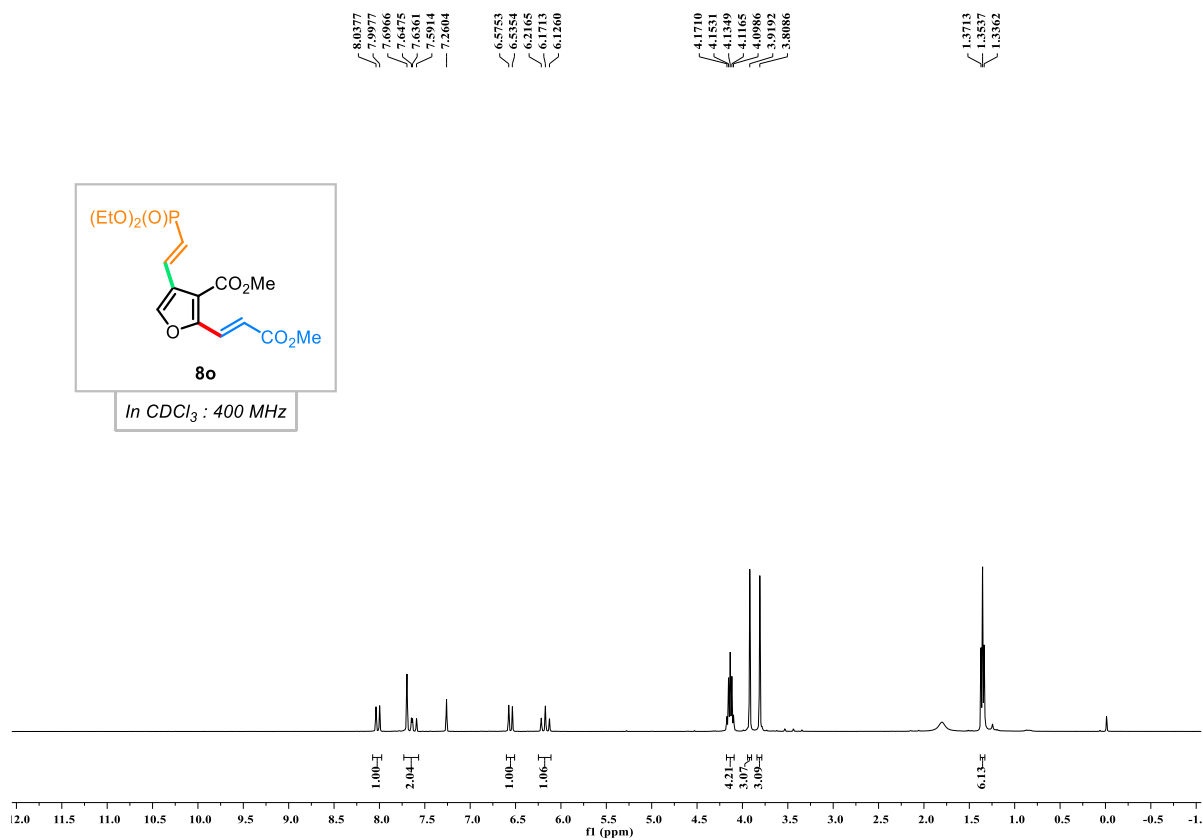

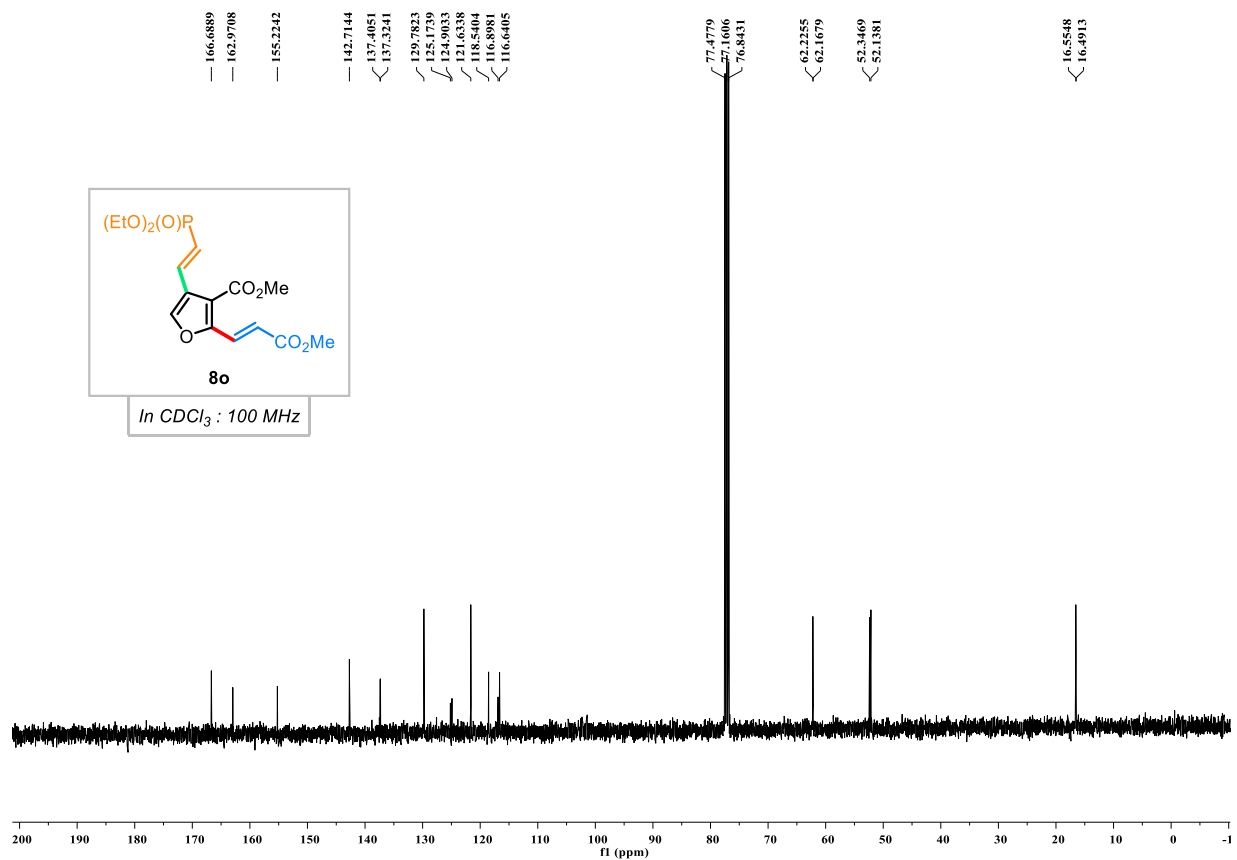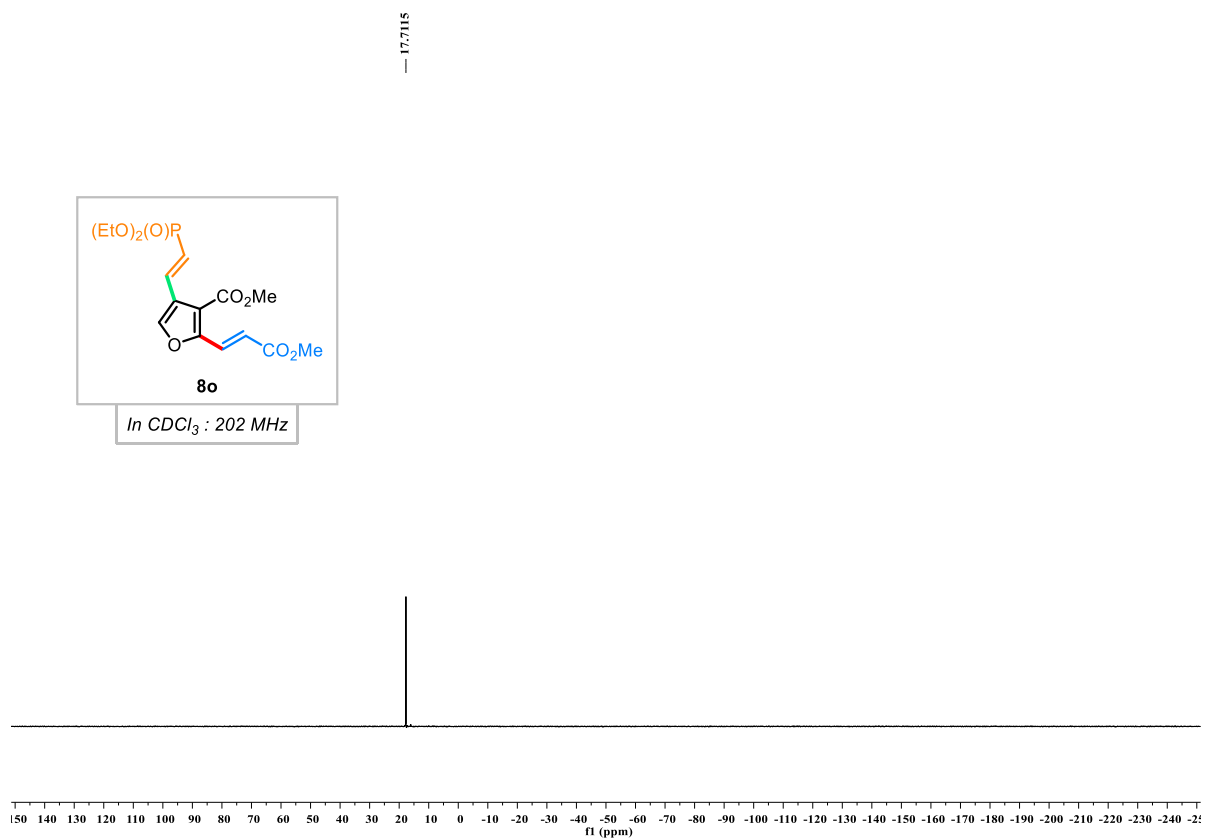

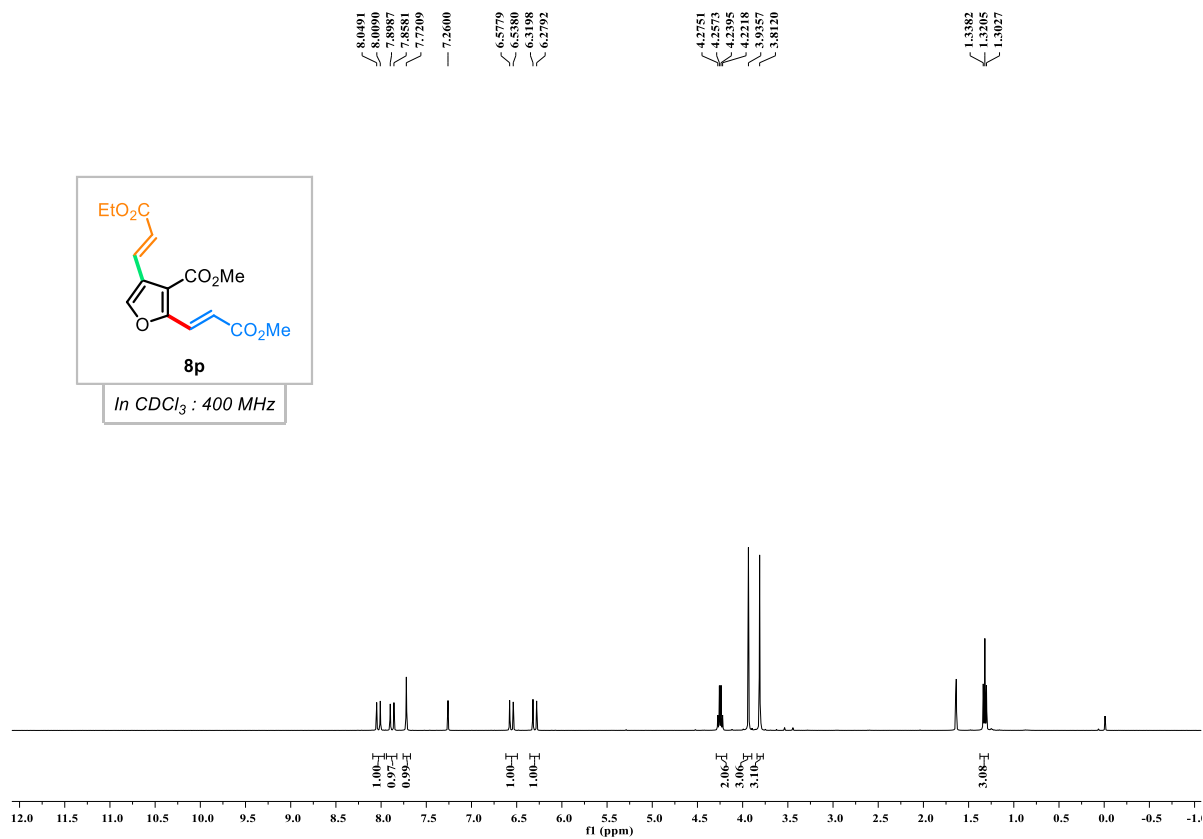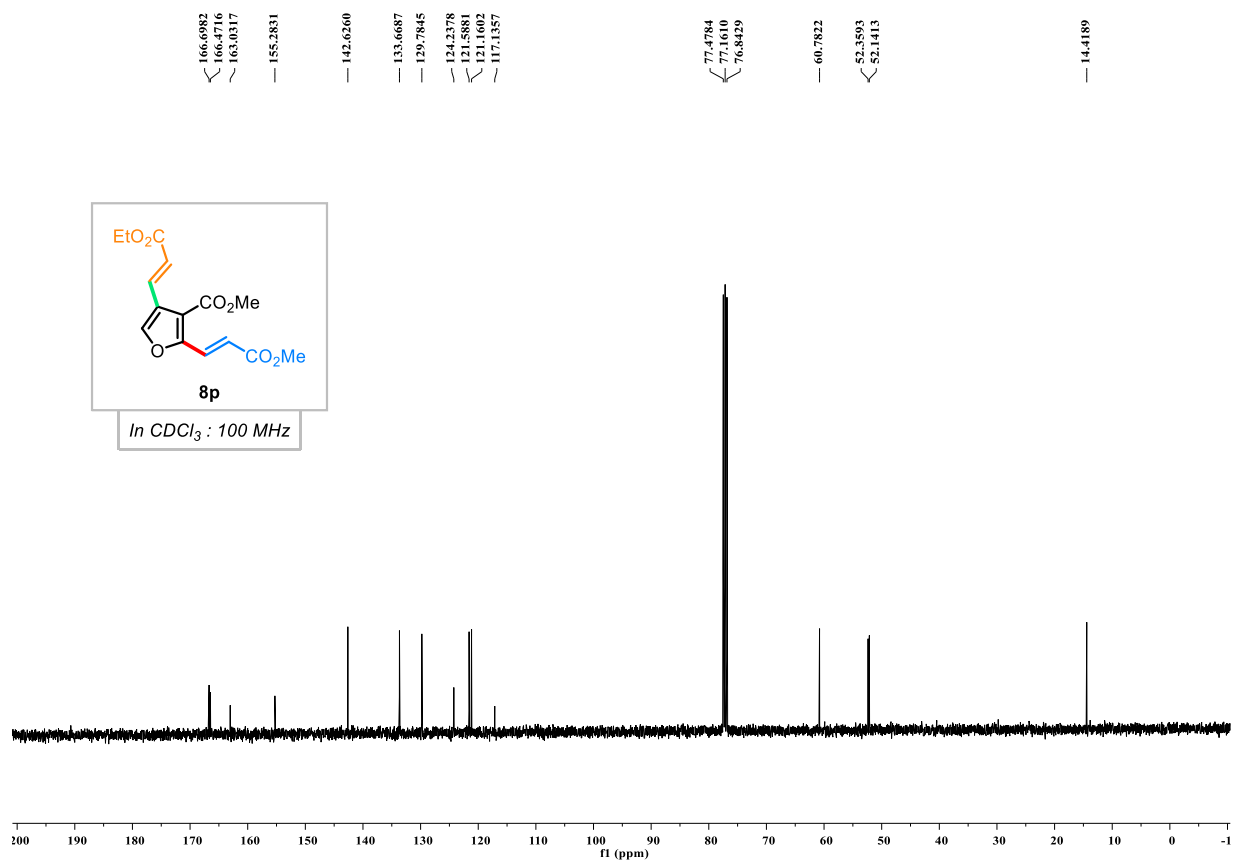

Supplement: Supplementary file 1 [file 25632772]
